# Supplementary material for: Cobalt-catalyzed (Z)-selective semihydrogenation of alkynes with molecular hydrogen
Source: Royal Society of Chemistry journal article supplement (doi:10.1039/c7cc01228d), 2017-01-01
Supplement: c7cc01228d1.pdf [file c7cc01228d1.pdf]

## Supporting Information for

# Cobalt-Catalyzed (Z)-Selective Semihydrogenation of Alkynes with Molecular Hydrogen

Caiyou Chen,<sup>a</sup> Yi Huang,<sup>a</sup> Zongpeng Zhang,<sup>a</sup> Xiu-Qin Dong<sup>\*a</sup>, and Xumu Zhang<sup>\*b, a</sup>

<sup>a</sup> College of Chemistry and Molecular Sciences, Wuhan University, Wuhan, Hubei, 430072, P. R. China

<sup>b</sup> Department of Chemistry South University of Science and Technology of China, Shenzhen, 518055, P.R. China

## Contents

|                                                              |    |
|--------------------------------------------------------------|----|
| General Remarks.....                                         | 2  |
| Synthesis of the alkynes .....                               | 2  |
| General procedure for the semihydrogenation of alkynes ..... | 7  |
| Characterization data of compounds 2a-2v .....               | 8  |
| Control experiments.....                                     | 14 |
| NMR Spectra .....                                            | 15 |
| References .....                                             | 57 |

## General Remarks

All reactions were performed in the argon-filled glovebox or under nitrogen using standard Schlenk techniques, unless otherwise noted. Solvents were degassed through three freeze-pump-thaw cycles. Column chromatography was performed using 400 mesh silica gel. Thin layer chromatography (TLC) was performed on EM reagents 0.25 mm silica 60-F plates.  $^1\text{H}$ ,  $^{13}\text{C}$  spectrum were recorded on Bruker-400, with  $\text{CDCl}_3$  as the solvent and tetramethylsilane (TMS) as the internal standard. Chemical shifts were reported in ppm, upfield to TMS (0.00 ppm) for and relative to  $\text{CDCl}_3$  (7.26 ppm, 77.3 ppm) for  $^1\text{H}$  NMR and  $^{13}\text{C}$  NMR. GC analysis was carried out on SHIMADZU Lab Solution using achiral capillary columns. Unless otherwise noted, all reagents and solvents were purchased from commercial suppliers and used without further purification. Substrates **1a** and **1f** are commercially available. Substrates **2b-2d** were prepared according to the literature procedures<sup>1</sup>.

## Synthesis of the alkynes

### 1. Synthesis of the 3-substituted propargyl amines **1g-1l** and **1w**

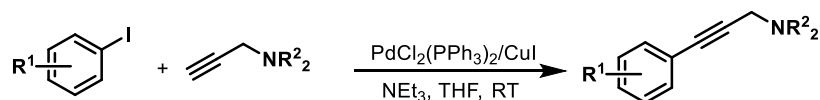

This is a modified procedure based on the literature report<sup>2</sup>: To an oven dried schlenk flask was added phenyl iodides (5 mmol), PdCl<sub>2</sub>(PPh<sub>3</sub>)<sub>2</sub> (0.1 mmol, 70.2 mg), CuI (0.15 mmol, 28.6 mg), and a mixture of dry THF and NEt<sub>3</sub> (THF/NEt<sub>3</sub> = 6 mL/1.5 mL) under N<sub>2</sub> atmosphere. To the resulting solution was added the solution of the terminal alkynes (4-methyl-N-(prop-2-yn-1-yl)benzenesulfonamide, or N,N-dimethylprop-2-yn-1-amine, 6 mmol) in the mixture of dry THF and NEt<sub>3</sub> (THF/NEt<sub>3</sub> = 6 mL/1.5 mL) dropwise. After the addition, the reaction was stirred at room temperature for 12 h. Saturated aqueous solution of NH<sub>4</sub>Cl (30 mL) was added and the organic layer was separated. The aqueous layer was extracted with ethyl acetate (30 mL) three times. The combined organic phases were dried and concentrated under reduced pressure.

The residue was purified by silica gel column chromatography to give the desired products.

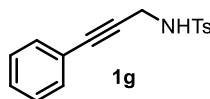

White solid, 81% yield;  $^1\text{H}$  NMR (400 MHz,  $\text{CDCl}_3$ ):  $\delta$  7.82 (d,  $J$  = 8.3 Hz, 2H), 7.29-7.22 (m, 5H), 7.13 (dd,  $J$  = 8.1, 1.4 Hz, 2H), 4.67 (t,  $J$  = 5.9 Hz, 1H), 4.08 (d,  $J$  = 6.1 Hz, 2H), 2.36 (s, 3H) ppm;  $^{13}\text{C}$  NMR (101 MHz,  $\text{CDCl}_3$ ):  $\delta$  144.07, 137.05, 131.81, 129.99, 128.82, 128.44, 127.77, 122.26, 85.00, 83.43, 34.09, 21.76 ppm.

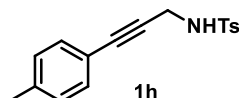

White solid, 75% yield;  $^1\text{H}$  NMR (400 MHz,  $\text{CDCl}_3$ ):  $\delta$  7.87 – 7.73 (m, 2H), 7.27 (d,  $J$  = 8.8 Hz, 2H), 7.10 – 6.93 (m, 4H), 4.79 (t,  $J$  = 5.9 Hz, 1H), 4.06 (d,  $J$  = 6.1 Hz, 2H), 2.36 (s, 3H), 2.32 (s, 3H) ppm;  $^{13}\text{C}$  NMR (101 MHz,  $\text{CDCl}_3$ ):  $\delta$  143.97, 138.94, 137.04, 131.70, 129.95, 129.17, 127.75, 119.17, 85.08, 82.74, 34.09, 21.74, 21.72 ppm.

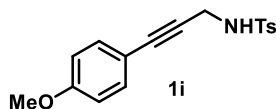

White solid, 71% yield;  $^1\text{H}$  NMR (400 MHz,  $\text{CDCl}_3$ ):  $\delta$  7.81 (d,  $J$  = 8.3 Hz, 2H), 7.28 (d,  $J$  = 8.0 Hz, 2H), 7.08 (d,  $J$  = 8.9 Hz, 2H), 6.80 – 6.74 (m, 2H), 4.69 (t,  $J$  = 6.0 Hz, 1H), 4.05 (d,  $J$  = 6.1 Hz, 2H), 3.79 (s, 3H), 2.38 (s, 3H);  $^{13}\text{C}$  NMR (101 MHz,  $\text{CDCl}_3$ ):  $\delta$  159.97, 143.98, 137.05, 133.30, 129.96, 127.76, 114.32, 114.04, 84.93, 82.03, 55.55, 34.15, 21.78 ppm.

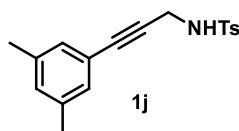

White solid, 78% yield;  $^1\text{H}$  NMR (400 MHz,  $\text{CDCl}_3$ ):  $\delta$  7.82 (d,  $J$  = 8.3 Hz, 2H), 7.29 (d,  $J$  = 8.0 Hz, 2H), 6.92 (s, 1H), 6.75 (s, 2H), 4.79 (t,  $J$  = 6.0 Hz, 1H), 4.06 (d,  $J$  = 6.1 Hz, 2H), 2.37 (s, 3H), 2.24 (s, 6H) ppm;  $^{13}\text{C}$  NMR (101 MHz,  $\text{CDCl}_3$ ):  $\delta$  143.68, 137.73, 136.86, 130.45, 129.73, 129.25, 127.54, 121.65, 85.03, 82.46, 33.83, 21.54, 21.10 ppm.

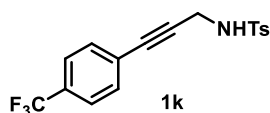

White solid, 70% yield;  $^1\text{H}$  NMR (400 MHz,  $\text{CDCl}_3$ ):  $\delta$  7.82 (d,  $J = 8.3$  Hz, 2H), 7.50 (d,  $J = 8.2$  Hz, 2H), 7.30 – 7.19 (m, 4H), 4.95 (t,  $J = 5.3$  Hz, 1H), 4.10 (d,  $J = 5.8$  Hz, 2H), 2.34 (s, 3H) ppm;  $^{13}\text{C}$  NMR (101 MHz,  $\text{CDCl}_3$ ):  $\delta$  143.88, 136.81, 131.82, 130.25 (q,  $J = 32.7$  Hz), 129.74, 127.54, 125.88, 125.10 (q,  $J = 3.8$  Hz), 123.73 (q,  $J = 272.2$  Hz), 85.83, 83.36, 33.65, 21.47 ppm.

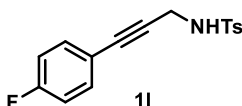

White solid, 76% yield;  $^1\text{H}$  NMR (400 MHz,  $\text{CDCl}_3$ ):  $\delta$  7.88 – 7.75 (m, 2H), 7.32 – 7.25 (m, 2H), 7.18 – 7.05 (m, 2H), 6.99 – 6.87 (m, 2H), 4.93 (t,  $J = 6.0$  Hz, 1H), 4.06 (d,  $J = 6.2$  Hz, 2H), 2.36 (s, 3H);  $^{13}\text{C}$  NMR (101 MHz,  $\text{CDCl}_3$ ):  $\delta$  162.54 (d,  $J = 250.0$  Hz), 143.77, 136.83, 133.50 (d,  $J = 8.4$  Hz), 129.72, 127.53, 118.15 (d,  $J = 3.5$  Hz), 115.48 (d,  $J = 22.1$  Hz), 83.66, 83.00 (d,  $J = 1.4$  Hz), 33.72, 21.51 ppm.

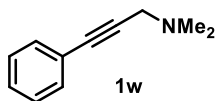

White solid, 68% yield;  $^1\text{H}$  NMR (400 MHz,  $\text{CDCl}_3$ ):  $\delta$  7.48 – 7.40 (m, 2H), 7.32 – 7.27 (m, 3H), 3.47 (s, 2H), 2.37 (s, 6H) ppm;  $^{13}\text{C}$  NMR (101 MHz,  $\text{CDCl}_3$ ):  $\delta$  131.94, 128.49, 128.26, 123.46, 85.45, 84.87, 48.83, 44.54 ppm.

## 2. Synthesis of the 3-substituted propargyl alcohols 1e, 1m-1v and 1x

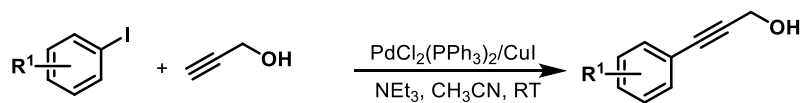

This is a modified procedure based on the literature report <sup>3</sup>: To an oven dried schlenk flask was added phenyl iodides (5 mmol),  $\text{PdCl}_2(\text{PPh}_3)_2$  (0.05 mmol, 35.5 mg),  $\text{CuI}$  (0.1 mmol, 19.1 mg), and a mixture of dry  $\text{CH}_3\text{CN}$  and  $\text{NEt}_3$  ( $\text{CH}_3\text{CN}/\text{NEt}_3 = 3 \text{ mL}/3 \text{ mL}$ ) under  $\text{N}_2$  atmosphere. To the resulting solution was added prop-2-yn-1-ol (5.5 mmol, 308.6 mg) or hex-1-yne (6 mmol, 492 mg) dropwise. After the addition, the reaction was stirred at room temperature for 12 h. Saturated aqueous solution of  $\text{NH}_4\text{Cl}$  (30 mL) was added and the organic layer was separated. The aqueous layer was extracted with ethyl acetate (30 mL) three times. The combined organic phases

were dried and concentrated under reduced pressure. The residue was purified by silica gel column chromatography to give the desired products.

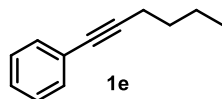

Yellow oil, 92% yield;  $^1\text{H}$  NMR (400 MHz,  $\text{CDCl}_3$ ):  $\delta$  7.43 – 7.35 (m, 2H), 7.31 – 7.23 (m, 3H), 2.40 (t,  $J = 7.0$  Hz, 2H), 1.63 – 1.54 (m, 2H), 1.53 – 1.42 (m, 2H), 0.94 (t,  $J = 7.3$  Hz, 3H) ppm;  $^{13}\text{C}$  NMR (101 MHz,  $\text{CDCl}_3$ ):  $\delta$  131.56, 128.21, 127.49, 124.10, 90.45, 80.56, 30.88, 22.06, 19.14, 13.71 ppm.

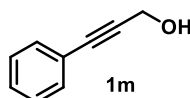

Yellow oil, 90% yield;  $^1\text{H}$  NMR (400 MHz,  $\text{CDCl}_3$ ):  $\delta$  7.49 – 7.40 (m, 2H), 7.37 – 7.27 (m, 3H), 4.50 (s, 2H), 1.87 (s, 1H) ppm;  $^{13}\text{C}$  NMR (101 MHz,  $\text{CDCl}_3$ ):  $\delta$  131.72, 128.55, 128.36, 122.52, 87.21, 85.72, 51.67 ppm.

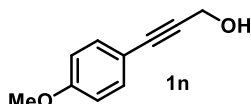

White solid, 85% yield;  $^1\text{H}$  NMR (400 MHz,  $\text{CDCl}_3$ ):  $\delta$  7.39 – 7.36 (m, 2H), 6.86 – 6.83 (m, 2H), 4.48 (s, 2H), 3.81 (s, 3H), 1.93 (s, 1H) ppm;  $^{13}\text{C}$  NMR (101 MHz,  $\text{CDCl}_3$ ):  $\delta$  159.73, 133.21, 114.60, 113.96, 85.89, 85.65, 55.31, 51.72 ppm.

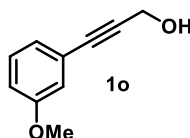

White solid, 88% yield;  $^1\text{H}$  NMR (400 MHz,  $\text{CDCl}_3$ ):  $\delta$  7.25 – 7.18 (m, 1H), 7.03 (dt,  $J = 7.6, 1.1$  Hz, 1H), 6.97 (dd,  $J = 2.5, 1.4$  Hz, 1H), 6.88 (ddd,  $J = 8.4, 2.6, 0.9$  Hz, 1H), 4.49 (s, 2H), 3.79 (s, 3H), 2.09 (s, 1H) ppm;  $^{13}\text{C}$  NMR (101 MHz,  $\text{CDCl}_3$ ):  $\delta$  159.25, 129.44, 124.23, 123.52, 116.54, 115.09, 87.09, 85.59, 55.29, 51.61 ppm.

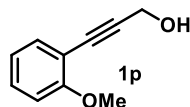

White solid, 78% yield;  $^1\text{H}$  NMR (400 MHz,  $\text{CDCl}_3$ )  $\delta$  7.41 (dd,  $J = 7.6, 1.7$  Hz, 1H), 7.35 – 7.27 (m, 1H), 6.96 – 6.82 (m, 2H), 4.55 (s, 2H), 3.88 (s, 3H), 2.37 (s, 1H)

ppm;  $^{13}\text{C}$  NMR (101 MHz,  $\text{CDCl}_3$ ):  $\delta$  159.94, 133.78, 130.02, 120.53, 111.61, 110.57, 91.49, 81.87, 55.79, 51.83 ppm.

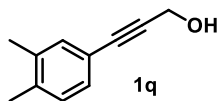

White solid, 85% yield;  $^1\text{H}$  NMR (400 MHz,  $\text{CDCl}_3$ ):  $\delta$  7.22 (s, 1H), 7.18 (d,  $J$  = 7.8 Hz, 1H), 7.07 (d,  $J$  = 7.7 Hz, 1H), 4.48 (s, 2H), 2.25 (s, 3H), 2.23 (s, 3H), 1.81 (s, 1H) ppm;  $^{13}\text{C}$  NMR (101 MHz,  $\text{CDCl}_3$ ):  $\delta$  137.50, 136.70, 132.75, 129.65, 129.15, 119.72, 86.28, 85.99, 51.73, 19.80, 19.61 ppm.

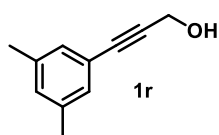

White solid, 81% yield;  $^1\text{H}$  NMR (400 MHz,  $\text{CDCl}_3$ ):  $\delta$  7.06 (s, 2H), 6.95 (s, 1H), 4.48 (s, 2H), 2.27 (s, 6H), 2.17 (s, 1H) ppm;  $^{13}\text{C}$  NMR (101 MHz,  $\text{CDCl}_3$ ):  $\delta$  137.92, 130.44, 129.39, 122.15, 86.57, 85.99, 51.63, 21.12 ppm.

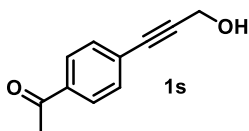

Yellow oil, 83% yield;  $^1\text{H}$  NMR (400 MHz,  $\text{CDCl}_3$ ):  $\delta$  7.90 (d,  $J$  = 8.6 Hz, 2H), 7.51 (d,  $J$  = 8.5 Hz, 2H), 4.53 (s, 2H), 2.61 (s, 3H), 2.00 (s, 1H) ppm;  $^{13}\text{C}$  NMR (101 MHz,  $\text{CDCl}_3$ ):  $\delta$  197.52, 136.42, 131.82, 128.27, 127.47, 90.58, 84.86, 51.61, 26.69 ppm.

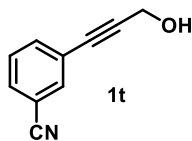

Yellow oil, 79% yield;  $^1\text{H}$  NMR (400 MHz,  $\text{CDCl}_3$ ):  $\delta$  7.69 (t,  $J$  = 1.4 Hz, 1H), 7.64 (dt,  $J$  = 7.8, 1.4 Hz, 1H), 7.60 (dt,  $J$  = 7.8, 1.4 Hz, 1H), 7.43 (td,  $J$  = 7.8, 0.4 Hz, 1H), 4.52 (s, 2H), 2.32 (s, 1H) ppm;  $^{13}\text{C}$  NMR (101 MHz,  $\text{CDCl}_3$ ):  $\delta$  135.84, 134.98, 131.72, 129.33, 124.24, 118.05, 112.72, 89.91, 83.16, 51.34 ppm.

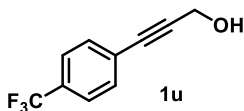

Yellow solid, 83% yield;  $^1\text{H}$  NMR (400 MHz,  $\text{CDCl}_3$ ):  $\delta$  7.54 (q,  $J$  = 8.4 Hz, 4H), 4.53 (s, 2H), 2.15 (s, 1H) ppm;  $^{13}\text{C}$  NMR (101 MHz,  $\text{CDCl}_3$ ):  $\delta$  131.91, 130.24 (q,  $J$  = 32.7 Hz), 126.33 (q,  $J$  = 1.3 Hz), 125.28 (q,  $J$  = 3.8 Hz), 123.85 (q,  $J$  = 272.2 Hz), 89.61, 84.35, 51.51 ppm.

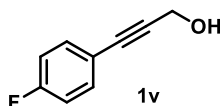

Yellow solid, 81% yield;  $^1\text{H}$  NMR (400 MHz,  $\text{CDCl}_3$ ):  $\delta$  7.47 – 7.36 (m, 2H), 7.07 – 6.93 (m, 2H), 4.49 (s, 2H), 2.09 (s, 1H) ppm;  $^{13}\text{C}$  NMR (101 MHz,  $\text{CDCl}_3$ )  $\delta$  162.62 (d,  $J$  = 249.7 Hz), 133.63 (d,  $J$  = 8.4 Hz), 118.60 (d,  $J$  = 3.6 Hz), 115.65 (d,  $J$  = 22.1 Hz), 86.91 (d,  $J$  = 1.4 Hz), 84.66, 51.56 ppm.

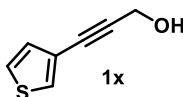

Yellow oil, 68% yield;  $^1\text{H}$  NMR (400 MHz,  $\text{CDCl}_3$ ):  $\delta$  7.25 (dd,  $J$  = 5.2, 1.2 Hz, 1H), 7.21 (dd,  $J$  = 3.6, 1.1 Hz, 1H), 6.96 (dd,  $J$  = 5.2, 3.6 Hz, 1H), 4.50 (s, 2H), 2.35 (s, 1H) ppm;  $^{13}\text{C}$  NMR (101 MHz,  $\text{CDCl}_3$ ):  $\delta$  132.45, 127.49, 127.03, 122.43, 91.22, 79.02, 51.65 ppm.

## General procedure for the semihydrogenation of alkynes

In an argon-filled glove box,  $\text{Co}(\text{OAc})_2 \cdot (\text{H}_2\text{O})_4$  and  $\text{NaBH}_4$  were dissolved in degassed EtOH and stirred for 10 min. Ethylenediamine (Ethylenediamine/ $\text{Co}$ / $\text{NaBH}_4$  = 8:2:1, the detailed amounts for each substrate were described in Table 2) was then added and the resulting suspension was stirred for another 10 min. The resulting suspension was transferred by syringe into the vials charged with different substrates (0.5 mmol for each). Additional degassed EtOH, THF, and water was added to bring the total reaction volume to 2.1 mL (EtOH/THF/ $\text{H}_2\text{O}$  = 1.0 : 1.0 : 0.1 mL). The vials were subsequently transferred into an autoclave which was purged with hydrogen three times and charged with hydrogen (3 bar). The reaction was then stirred at rt for different times (The reaction was monitored by GC-MS or  $^1\text{H}$  NMR, prolonged reaction time would decrease the selectivity to give increased amount of (E)-alkenes

and alkanes). The hydrogen gas was released slowly and carefully. The desired compounds **2** were then obtained by column chromatography.

## Characterization data of compounds **2a-2v**

According to the above mentioned procedure, compounds **2a-2v** can be obtained. Characterization data are as follows.

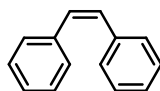

**2a**

S/C = 100, 24 h  
> 99% Conv.  
Z:E:A = 21 : 1 : 3

>99% conv., colorless oil,  $^1\text{H}$  NMR (400 MHz,  $\text{CDCl}_3$ ):  $\delta$  7.27 – 7.15 (m, 10H), 6.59 (s, 2H) ppm;  $^{13}\text{C}$  NMR (101 MHz,  $\text{CDCl}_3$ ):  $\delta$  137.48, 130.50, 129.13, 128.47, 127.35.

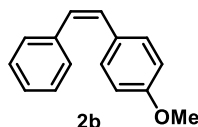

**2b**

S/C = 50, 16 h  
> 99% Conv.  
Z:E:A = 18 : 1 : 1

>99% conv., colorless oil,  $^1\text{H}$  NMR (400 MHz,  $\text{CDCl}_3$ ):  $\delta$  7.38 – 7.07 (m, 7H), 6.78 – 6.72 (m, 2H), 6.52 (d,  $J$  = 1.9 Hz, 2H), 3.78 (s, 3H) ppm;  $^{13}\text{C}$  NMR (101 MHz,  $\text{CDCl}_3$ ):  $\delta$  158.90, 137.86, 130.41, 130.01, 129.89, 129.07, 129.01, 128.50, 127.16, 113.82, 55.46 ppm.

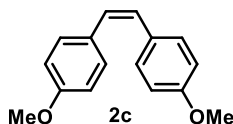

**2c**

S/C = 50, 24 h  
> 99% Conv.  
Z:E:A = 18 : 1 : 1

>99% conv., colorless oil;  $^1\text{H}$  NMR (400 MHz,  $\text{CDCl}_3$ ):  $\delta$  7.20 (d,  $J$  = 8.8 Hz, 4H), 6.76 (d,  $J$  = 8.8 Hz, 4H), 6.44 (s, 2H), 3.77 (s, 6H) ppm;  $^{13}\text{C}$  NMR (101 MHz,  $\text{CDCl}_3$ ):  $\delta$  158.73, 130.29, 130.21, 128.60, 113.82, 55.42 ppm.



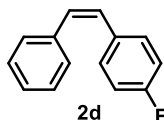

S/C = 50, 16 h  
 > 99% Conv.  
 Z:E:A = 15 : 1 : 1

>99% conv., colorless oil;  $^1\text{H}$  NMR (400 MHz,  $\text{CDCl}_3$ ):  $\delta$  7.24 – 7.16 (m, 7H), 6.94 – 6.87 (m, 2H), 6.56 (q,  $J$  = 12.2 Hz, 2H) ppm;  $^{13}\text{C}$  NMR (101 MHz,  $\text{CDCl}_3$ ):  $\delta$  162.06 (d,  $J$  = 246.6 Hz), 137.28, 133.42 (d,  $J$  = 3.5 Hz), 130.79 (d,  $J$  = 7.9 Hz), 130.50 (d,  $J$  = 1.2 Hz), 129.33, 129.08, 128.58, 127.46, 115.42 (d,  $J$  = 21.4 Hz) ppm.

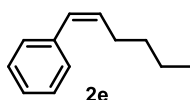

S/C = 200, 24 h  
 > 99% Conv.  
 Z:E:A = 10 : 1 : 2

>99% conv., colorless oil,  $^1\text{H}$  NMR (400 MHz,  $\text{CDCl}_3$ ):  $\delta$  7.37 – 7.24 (m, 4H), 7.24 – 7.16 (m, 1H), 6.40 (d,  $J$  = 11.6 Hz, 1H), 5.66 (dt,  $J$  = 11.7, 7.3 Hz, 1H), 2.33 (q,  $J$  = 7.3 Hz, 2H), 1.46 – 1.33 (m, 4H), 0.89 (t,  $J$  = 7.1 Hz, 3H) ppm;  $^{13}\text{C}$  NMR (101 MHz,  $\text{CDCl}_3$ ):  $\delta$  137.85, 133.29, 128.79, 128.69, 128.13, 126.44, 32.22, 28.41, 22.48, 14.04 ppm.

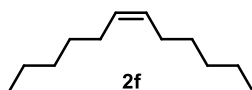

S/C = 100, 12 h  
 > 99% Conv.  
 Z:E:A = 20 : 1 : 1

>99% conv., colorless oil,  $^1\text{H}$  NMR (400 MHz,  $\text{CDCl}_3$ ):  $\delta$  5.35 (ddd,  $J$  = 5.5, 4.4, 1.0 Hz, 2H), 2.02 (dd,  $J$  = 12.6, 6.9 Hz, 4H), 1.44 – 1.17 (m, 12H), 1.01 – 0.78 (m, 6H) ppm;  $^{13}\text{C}$  NMR (101 MHz,  $\text{CDCl}_3$ ):  $\delta$  130.19, 31.82, 29.75, 27.46, 22.88, 14.38 ppm.

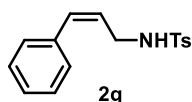

S/C = 20, 24 h  
 > 99% Conv.  
 Z:E:A = 33 : 1 : 3

>99% conv, white solid,  $^1\text{H}$  NMR (400 MHz,  $\text{CDCl}_3$ ):  $\delta$  7.73 (d,  $J = 7.2$  Hz, 2H), 7.35 – 7.20 (m, 6H), 7.09 (d,  $J = 7.5$  Hz, 2H), 6.52 (d,  $J = 11.5$  Hz, 1H), 5.56 (dt,  $J = 13.3, 6.8$  Hz, 1H), 4.63 (t,  $J = 5.6$  Hz, 1H), 3.85 (t,  $J = 6.4$  Hz, 2H), 2.43 (s, 3H) ppm;  $^{13}\text{C}$  NMR (101 MHz,  $\text{CDCl}_3$ ):  $\delta$  143.79, 137.02, 136.04, 132.92, 130.00, 128.84, 128.61, 127.71, 127.45, 126.70, 41.57, 21.82 ppm.

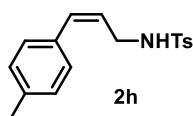

S/C = 20, 24 h  
> 99% Conv.  
Z:E:A = 25 : 1 : 2

>99% conv. white solid,  $^1\text{H}$  NMR (400 MHz,  $\text{CDCl}_3$ )  $\delta$  7.76 – 7.70 (m, 2H), 7.28 (d,  $J = 8.0$  Hz, 2H), 7.09 (d,  $J = 7.9$  Hz, 2H), 6.98 (d,  $J = 8.0$  Hz, 2H), 6.47 (d,  $J = 11.5$  Hz, 1H), 5.50 (dt,  $J = 11.6, 6.8$  Hz, 1H), 4.64 (t,  $J = 5.9$  Hz, 1H), 3.85 (td,  $J = 6.9, 1.7$  Hz, 2H), 2.43 (s, 3H), 2.33 (s, 3H) ppm;  $^{13}\text{C}$  NMR (101 MHz,  $\text{CDCl}_3$ ):  $\delta$  143.53, 137.34, 136.81, 132.94, 132.59, 129.77, 129.08, 128.56, 127.22, 125.68, 41.41, 21.59, 21.23 ppm.

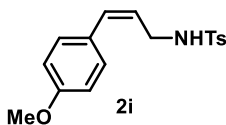

S/C = 20, 24 h  
> 99% Conv.  
Z:E:A = 51 : 1 : 3

>99% conv., white solid,  $^1\text{H}$  NMR (400 MHz,  $\text{CDCl}_3$ )  $\delta$  7.73 (dd,  $J = 8.4, 1.9$  Hz, 2H), 7.29 (d,  $J = 8.0$  Hz, 2H), 7.03 (d,  $J = 8.6$  Hz, 2H), 6.85 – 6.78 (m, 2H), 6.44 (d,  $J = 11.5$  Hz, 1H), 5.45 (dt,  $J = 11.5, 6.8$  Hz, 1H), 4.73 (t,  $J = 5.7$  Hz, 1H), 3.91 – 3.81 (m, 2H), 3.80 (s, 3H), 2.43 (s, 3H) ppm;  $^{13}\text{C}$  NMR (101 MHz,  $\text{CDCl}_3$ )  $\delta$  159.11, 143.76, 136.99, 132.44, 130.18, 129.98, 128.64, 127.44, 124.88, 113.99, 55.52, 41.63, 21.80 ppm.

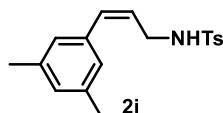

S/C = 20, 24 h  
> 99% Conv.  
Z:E:A = 65 : 1 : 5

>99% conv., white solid;  $^1\text{H}$  NMR (400 MHz,  $\text{CDCl}_3$ ):  $\delta$  7.73 (d,  $J = 8.2$  Hz, 2H), 7.29 – 7.23 (m, 2H), 6.88 (s, 1H), 6.72 (s, 2H), 6.44 (d,  $J = 11.6$  Hz, 1H), 5.49

(dt,  $J = 11.6, 6.9$  Hz, 1H), 4.78 (t,  $J = 5.7$  Hz, 1H), 3.95 – 3.77 (m, 2H), 2.41 (s, 3H), 2.26 (s, 6H) ppm;  $^{13}\text{C}$  NMR (101 MHz,  $\text{CDCl}_3$ ):  $\delta$  143.70, 138.10, 137.05, 135.96, 133.04, 129.95, 129.34, 127.40, 126.62, 126.27, 41.64, 21.77, 21.49 ppm.

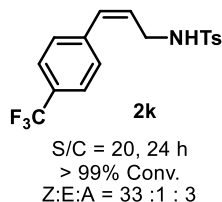

>99% conv., white solid;  $^1\text{H}$  NMR (400 MHz,  $\text{CDCl}_3$ ):  $\delta$  7.74 – 7.69 (m, 2H), 7.52 (d,  $J = 8.1$  Hz, 2H), 7.30 – 7.25 (m, 2H), 7.19 (d,  $J = 8.2$  Hz, 2H), 6.55 (d,  $J = 11.6$  Hz, 1H), 5.70 (dt,  $J = 11.6, 6.9$  Hz, 1H), 4.93 (s, 1H), 3.88 – 3.71 (m, 2H), 2.42 (s, 3H) ppm;  $^{13}\text{C}$  NMR (101 MHz,  $\text{CDCl}_3$ ):  $\delta$  144.02, 139.59, 136.71, 131.64, 130.04,  $\delta$  129.59 (q,  $J = 32.5$  Hz), 129.07, 128.82, 127.44, 125.51 (q,  $J = 3.8$  Hz), 124.27 (q,  $J = 272.0$  Hz), 41.36, 21.75 ppm.

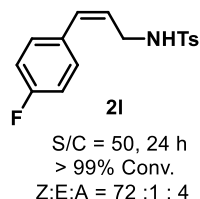

>99% conv., white solid;  $^1\text{H}$  NMR (400 MHz,  $\text{CDCl}_3$ ):  $\delta$  7.76 – 7.70 (m, 2H), 7.30 – 7.25 (m, 2H), 7.09 – 7.02 (m, 2H), 6.99 – 6.92 (m, 2H), 6.46 (d,  $J = 11.5$  Hz, 1H), 5.55 (dt,  $J = 11.6, 6.9$  Hz, 1H), 4.93 (t,  $J = 5.6$  Hz, 1H), 3.87 – 3.73 (m, 2H), 2.43 (s, 3H) ppm;  $^{13}\text{C}$  NMR (101 MHz,  $\text{CDCl}_3$ ):  $\delta$  162.17 (d,  $J = 247.4$  Hz), 143.86, 136.83, 132.09 (d,  $J = 3.4$  Hz), 131.80, 130.51 (d,  $J = 8.1$  Hz), 129.99, 127.42, 126.58 (d,  $J = 1.2$  Hz), 115.52 (d,  $J = 21.5$  Hz), 41.40, 21.78 ppm.

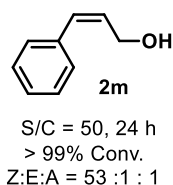

>99% conv., colorless oil;  $^1\text{H}$  NMR (400 MHz,  $\text{CDCl}_3$ ):  $\delta$  7.35 (ddd,  $J = 7.6, 4.4, 1.2$  Hz, 2H), 7.26 (ddd,  $J = 7.4, 3.9, 2.4$  Hz, 1H), 7.23 – 7.17 (m, 2H), 6.56 (d,  $J = 11.7$  Hz, 1H), 5.86 (dt,  $J = 11.8, 6.4$  Hz, 1H), 4.43 (dd,  $J = 6.4, 1.6$  Hz, 2H), 1.77 (s, 1H) ppm;  $^{13}\text{C}$  NMR (101 MHz,  $\text{CDCl}_3$ ):  $\delta$  136.74, 131.41, 131.22, 129.03, 128.52, 127.51, 59.93 ppm.

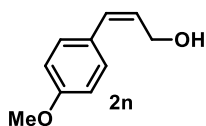

S/C = 20, 24 h  
> 99% Conv.  
Z:E:A = 50 : 1 : 2

>99% conv., colorless oil;  $^1\text{H}$  NMR (400 MHz,  $\text{CDCl}_3$ ):  $\delta$  7.15 (d,  $J = 8.7$  Hz, 2H), 6.93 – 6.85 (m, 2H), 6.50 (d,  $J = 11.7$  Hz, 1H), 5.86 – 5.68 (m, 1H), 4.43 (d,  $J = 6.4$  Hz, 2H), 3.81 (s, 3H), 1.79 (s, 1H) ppm;  $^{13}\text{C}$  NMR (101 MHz,  $\text{CDCl}_3$ )  $\delta$  158.79, 130.58, 130.13, 129.47, 129.21, 113.70, 59.77, 55.31 ppm.

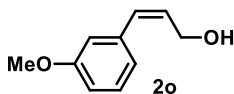

S/C = 20, 24 h  
> 99% Conv.  
Z:E:A = > 99 : 1 : 1

>99% conv., colorless oil;  $^1\text{H}$  NMR (400 MHz,  $\text{CDCl}_3$ ):  $\delta$  7.26 (t,  $J = 7.9$  Hz, 1H), 6.81 (dd,  $J = 13.2, 5.0$  Hz, 2H), 6.77 – 6.71 (m, 1H), 6.53 (d,  $J = 11.7$  Hz, 1H), 5.94 – 5.80 (m, 1H), 4.44 (d,  $J = 6.3$  Hz, 2H), 3.81 (s, 3H), 1.79 (s, 1H) ppm;  $^{13}\text{C}$  NMR (101 MHz,  $\text{CDCl}_3$ )  $\delta$  159.66, 138.13, 131.72, 131.08, 129.51, 121.53, 114.58, 113.00, 59.98, 55.48 ppm.

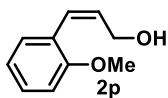

S/C = 20, 24 h  
> 99% Conv.  
Z:E:A = > 99 : 1 : 1

>99% conv., colorless oil;  $^1\text{H}$  NMR (400 MHz,  $\text{CDCl}_3$ ):  $\delta$  7.30 – 7.22 (m, 1H), 7.10 (dd,  $J = 7.5, 1.5$  Hz, 1H), 7.00 – 6.83 (m, 2H), 6.68 (d,  $J = 11.6$  Hz, 1H), 5.92 (dt,  $J = 11.7, 6.7$  Hz, 1H), 4.31 (d,  $J = 6.7$  Hz, 2H), 3.84 (s, 3H), 1.71 (s, 1H) ppm;  $^{13}\text{C}$  NMR (101 MHz,  $\text{CDCl}_3$ ):  $\delta$  157.08, 131.18, 130.51, 129.13, 127.08, 125.55, 120.46, 110.68, 60.14, 55.72 ppm.

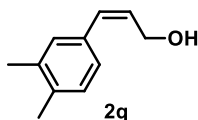

S/C = 200, 12 h  
> 99% Conv.  
Z:E:A = 25 : 1 : 1

>99% conv., colorless oil;  $^1\text{H}$  NMR (400 MHz,  $\text{CDCl}_3$ ):  $\delta$  7.11 (d,  $J = 7.6$  Hz, 1H), 7.02 – 6.89 (m, 2H), 6.51 (d,  $J = 11.7$  Hz, 1H), 5.80 (dt,  $J = 11.8, 6.4$  Hz, 1H), 4.44 (dd,  $J = 6.4, 1.3$  Hz, 2H), 2.26 (s, 6H), 1.68 (s, 1H) ppm;  $^{13}\text{C}$  NMR (101 MHz,  $\text{CDCl}_3$ ):  $\delta$  136.69, 136.06, 134.37, 131.20, 130.55, 130.34, 129.78, 126.48, 60.09, 20.08, 19.78 ppm.

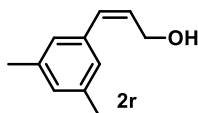

S/C = 200, 12 h  
> 99% Conv.  
Z:E:A = 18 : 1 : 2

>99% conv., colorless oil;  $^1\text{H}$  NMR (400 MHz,  $\text{CDCl}_3$ ):  $\delta$  6.91 (s, 1H), 6.82 (s, 2H), 6.50 (d,  $J = 11.8$  Hz, 1H), 5.82 (dt,  $J = 11.8, 6.4$  Hz, 1H), 4.44 (dd,  $J = 6.4, 1.6$  Hz, 2H), 2.31 (d,  $J = 0.5$  Hz, 6H), 1.65 (s, 1H) ppm;  $^{13}\text{C}$  NMR (101 MHz,  $\text{CDCl}_3$ ):  $\delta$  138.02, 136.68, 131.33, 131.11, 129.20, 126.84, 60.08, 21.58 ppm.

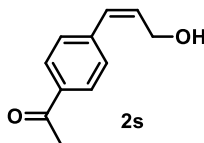

S/C = 200, 12 h  
> 99% Conv.  
Z:E:A = 11 : 1 : 1

>99% conv., colorless oil;  $^1\text{H}$  NMR (400 MHz,  $\text{CDCl}_3$ )  $\delta$  7.93 (d,  $J = 8.4$  Hz, 2H), 7.30 (d,  $J = 8.2$  Hz, 2H), 6.59 (d,  $J = 11.8$  Hz, 1H), 6.00 (dt,  $J = 11.9, 6.4$  Hz, 1H), 4.45 (d,  $J = 5.5$  Hz, 2H), 2.61 (s, 3H) ppm;  $^{13}\text{C}$  NMR (101 MHz,  $\text{CDCl}_3$ ):  $\delta$  197.83, 141.33, 135.66, 133.55, 129.93, 128.95, 128.40, 59.64, 26.68 ppm.

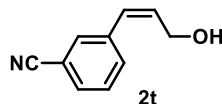

S/C = 100, 24 h  
> 99% Conv.  
Z:E:A = 17 : 1 : 1

>99% conv., colorless oil;  $^1\text{H}$  NMR (400 MHz,  $\text{CDCl}_3$ ):  $\delta$  7.57 – 7.53 (m, 1H), 7.50 (s, 1H), 7.47 – 7.43 (m, 2H), 6.54 (d,  $J = 11.8$  Hz, 1H), 6.01 (dt,  $J = 11.8, 6.5$  Hz, 1H), 4.39 (dd,  $J = 6.5, 1.6$  Hz, 2H), 1.97 (s, 1H) ppm;  $^{13}\text{C}$  NMR (101 MHz,  $\text{CDCl}_3$ ):  $\delta$  137.87, 133.79, 133.32, 132.34, 130.94, 129.39, 129.09, 118.96, 112.65, 59.43 ppm.

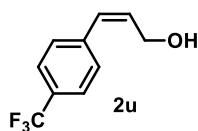

S/C = 100, 12 h  
> 99% Conv.  
Z:E:A = 18 : 1 : 1

>99% conv., colorless oil;  $^1\text{H}$  NMR (400 MHz,  $\text{CDCl}_3$ ):  $\delta$  7.60 (d,  $J$  = 8.1 Hz, 2H), 7.31 (d,  $J$  = 8.4 Hz, 2H), 6.59 (d,  $J$  = 11.8 Hz, 1H), 5.99 (dt,  $J$  = 11.8, 6.5 Hz, 1H), 4.42 (dd,  $J$  = 6.5, 1.5 Hz, 2H), 1.80 (s, 1H) ppm;  $^{13}\text{C}$  NMR (101 MHz,  $\text{CDCl}_3$ ):  $\delta$  140.23 (q,  $J$  = 1.3 Hz), 133.44, 130.04, 129.46 (q,  $J$  = 32.4 Hz), 129.24, 125.47 (q,  $J$  = 3.8 Hz), 124.38 (q,  $J$  = 271.9 Hz), 59.71 ppm.

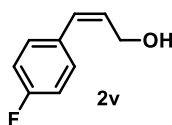

S/C = 50, 24 h  
> 99% Conv  
Z:E:A = 28 : 1 : 1

>99% conv., colorless oil;  $^1\text{H}$  NMR (400 MHz,  $\text{CDCl}_3$ ):  $\delta$  7.23 – 7.14 (m, 2H), 7.07 – 6.98 (m, 2H), 6.52 (d,  $J$  = 11.7 Hz, 1H), 5.93 – 5.78 (m, 1H), 4.40 (dd,  $J$  = 6.5, 1.5 Hz, 2H), 1.78 (s, 1H) ppm;  $^{13}\text{C}$  NMR (101 MHz,  $\text{CDCl}_3$ )  $\delta$  161.96 (d,  $J$  = 247.0 Hz), 132.55 (d,  $J$  = 3.4 Hz), 130.89 (d,  $J$  = 1.2 Hz), 130.44 (d,  $J$  = 8.0 Hz), 130.08, 115.23 (d,  $J$  = 21.5 Hz), 59.52 ppm.

## Control experiments

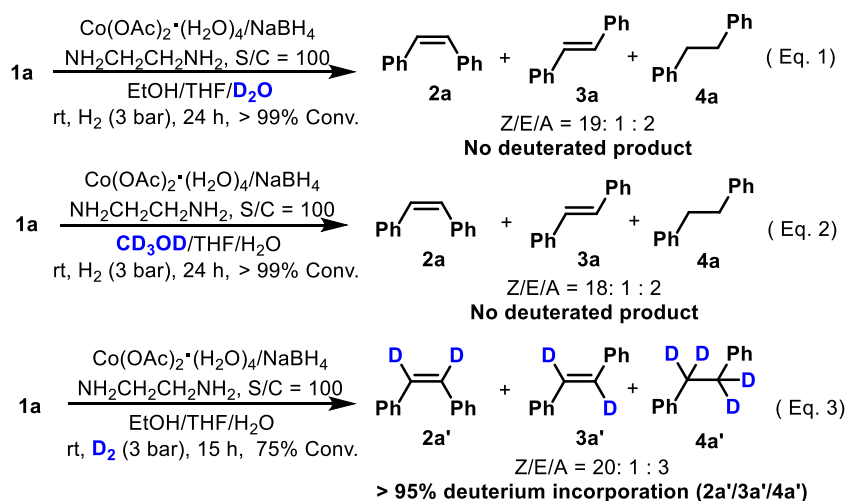

The reaction procedure was the same as the general procedure described for the semihydrogenation of alkynes except using MeOD,  $\text{D}_2\text{O}$  or  $\text{D}_2$ .

# NMR Spectra

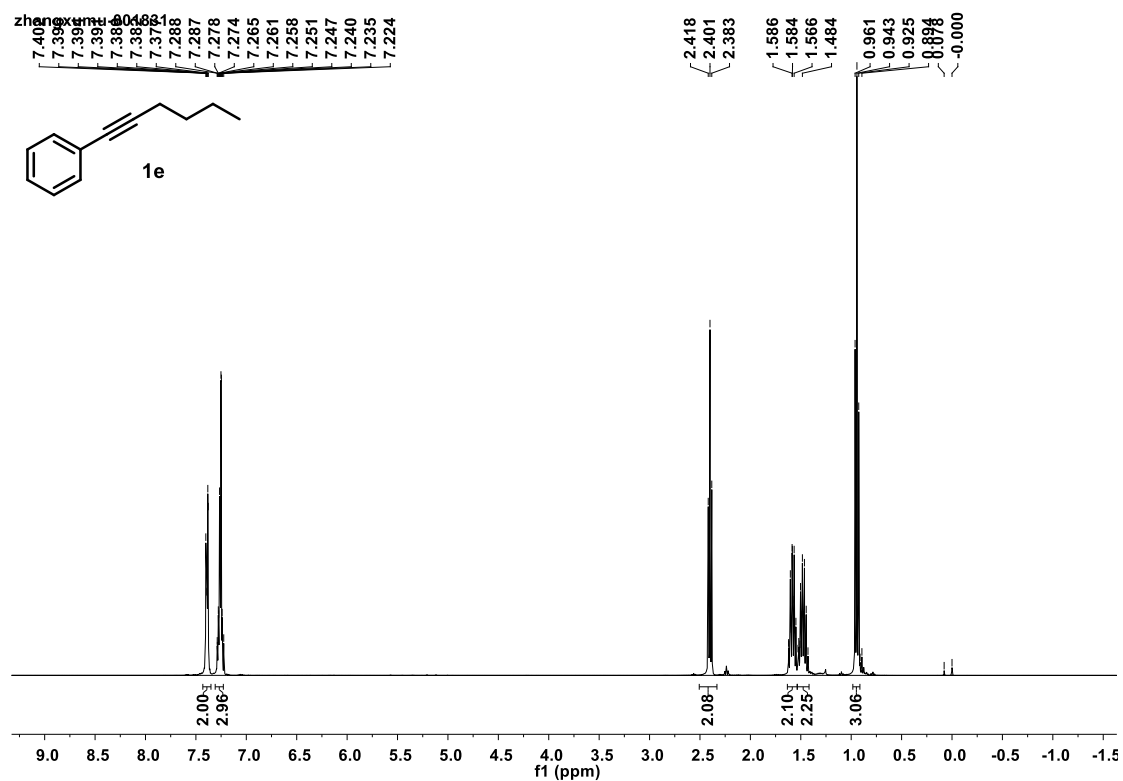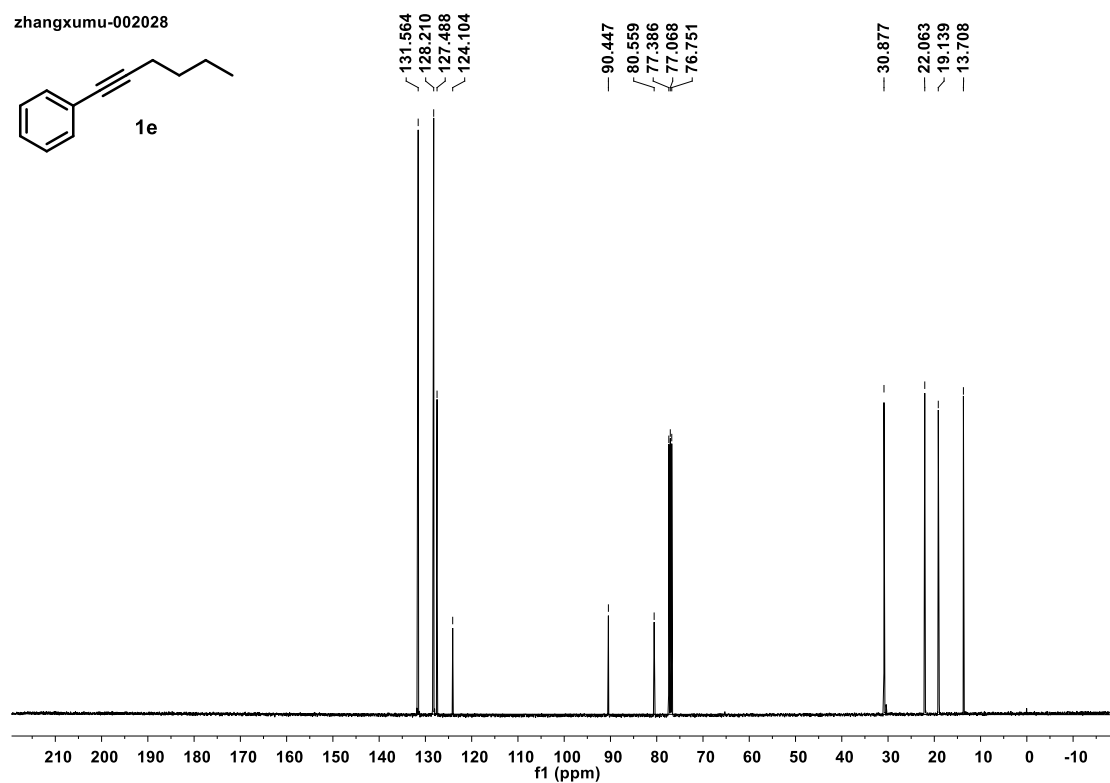

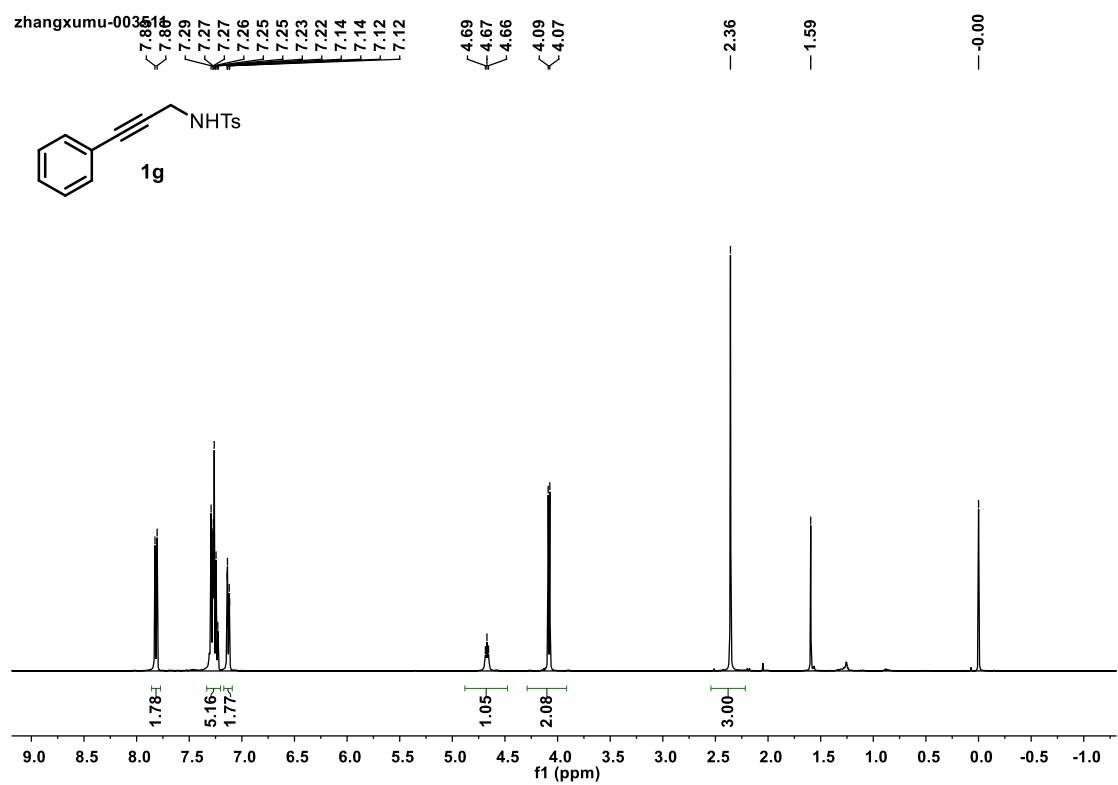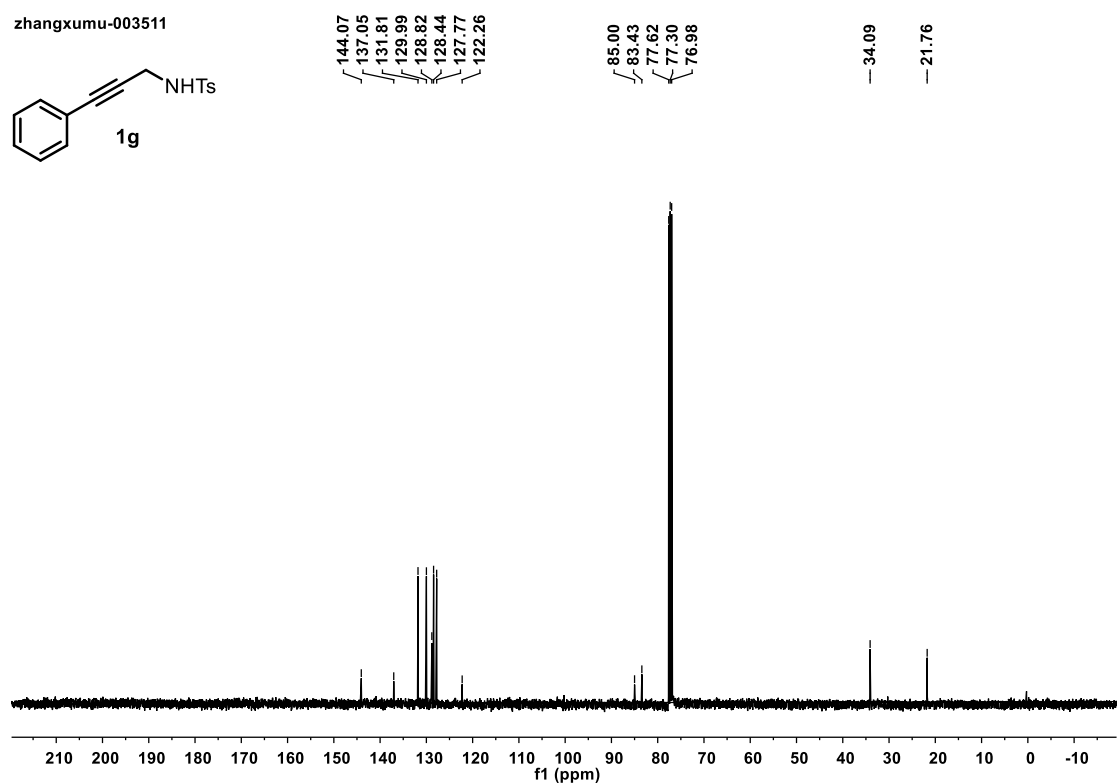



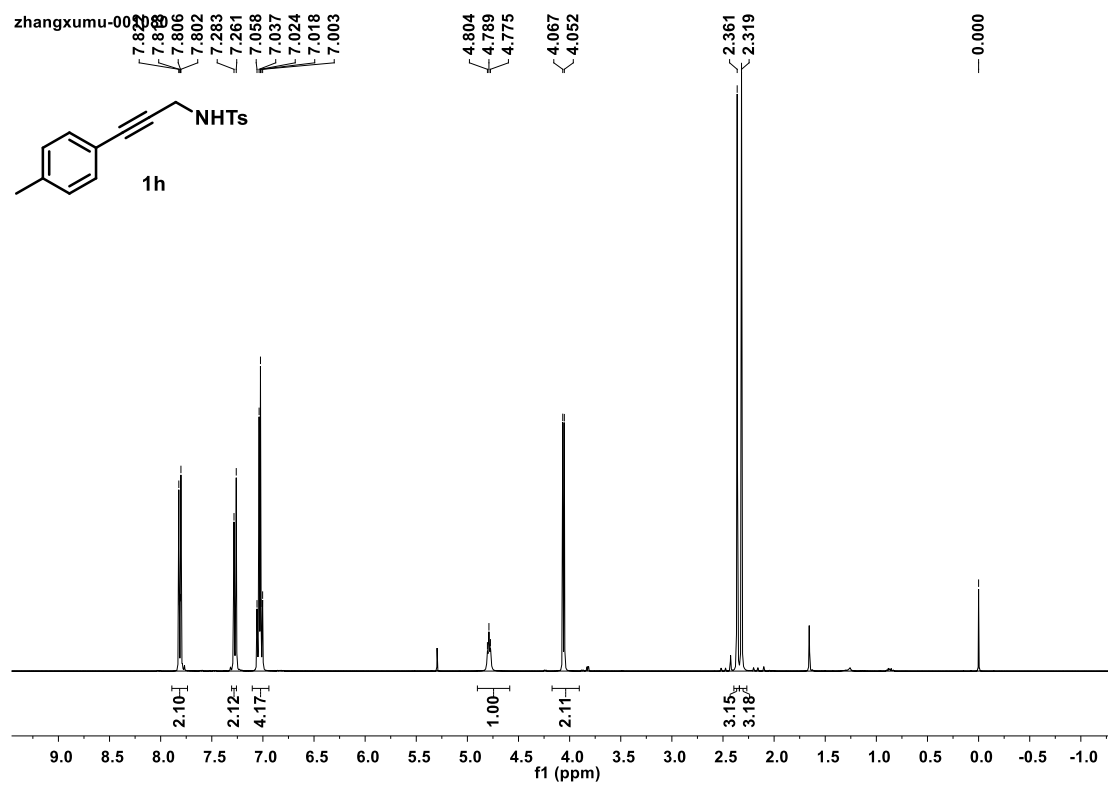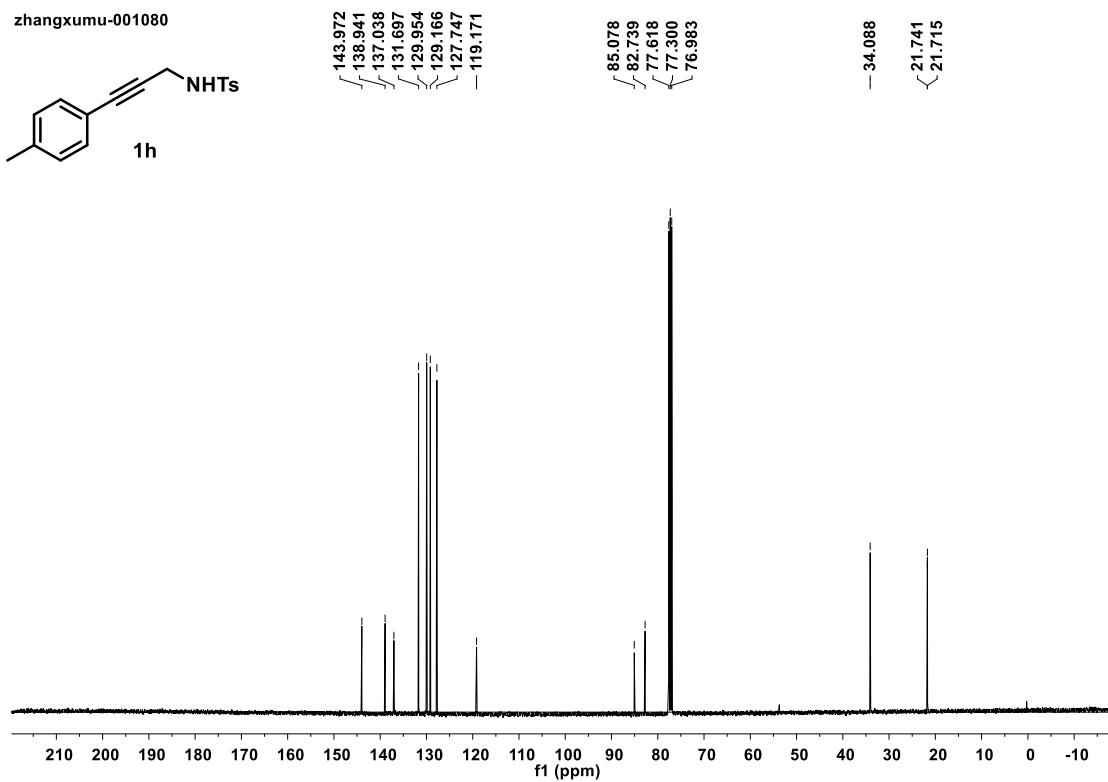

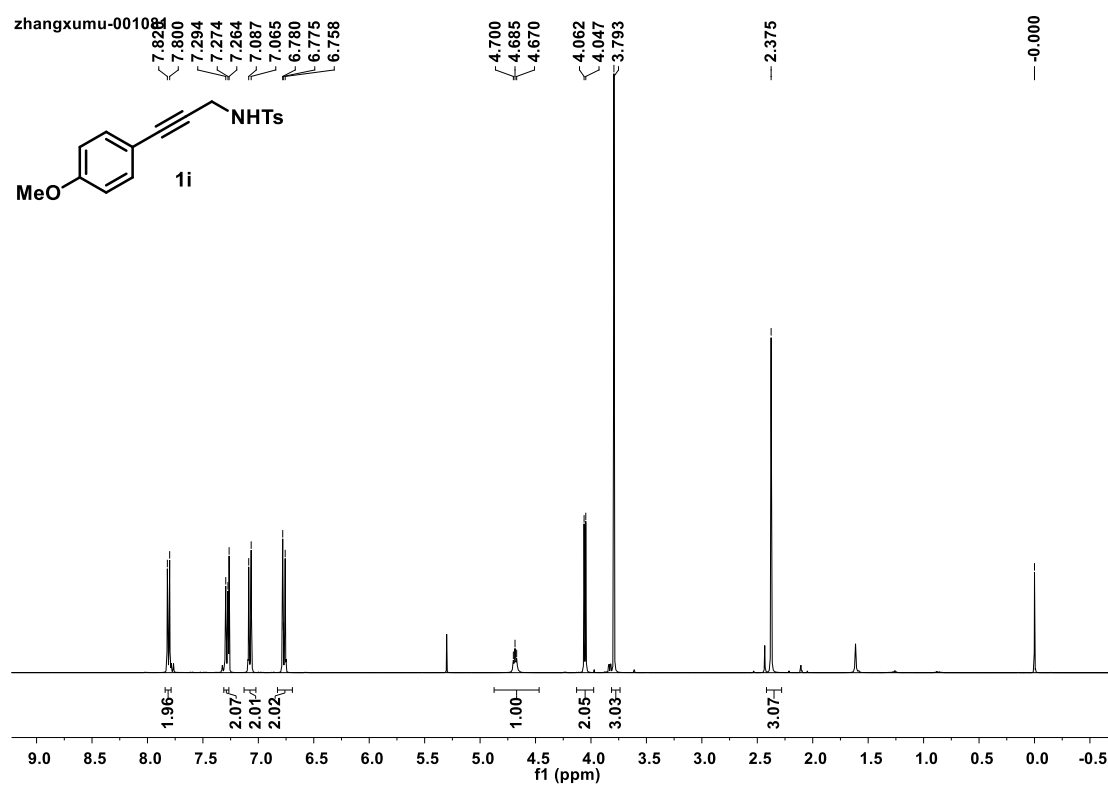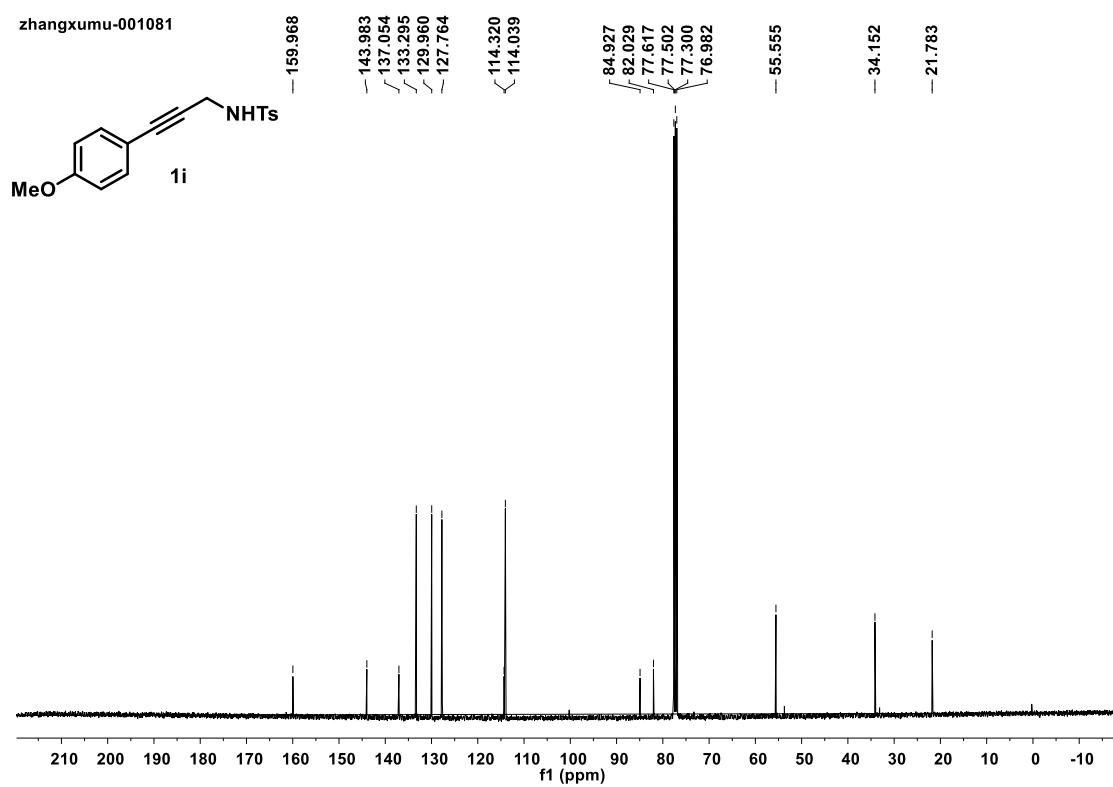

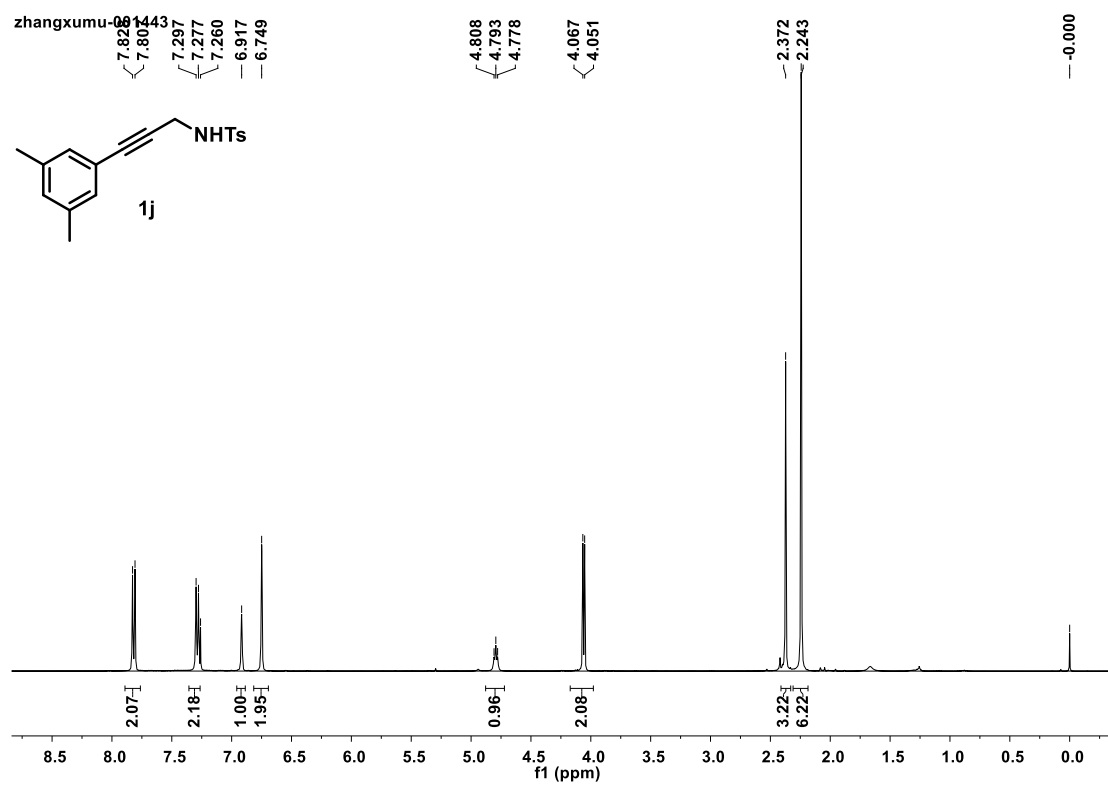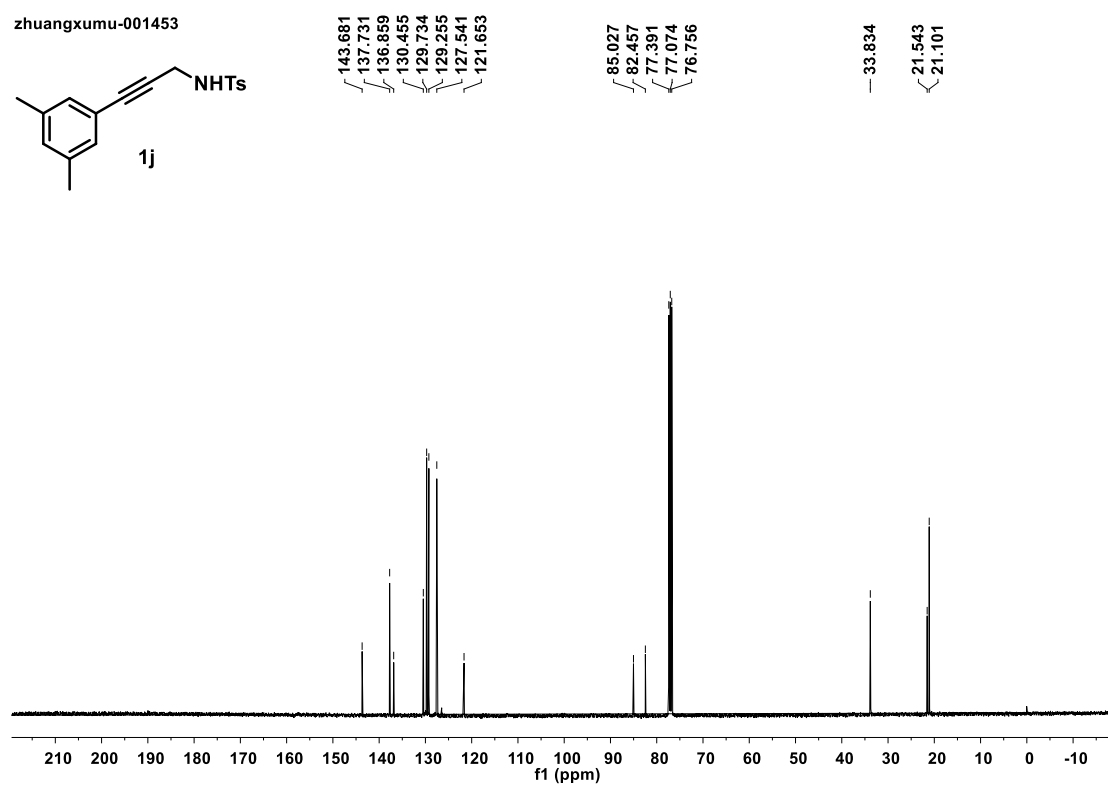

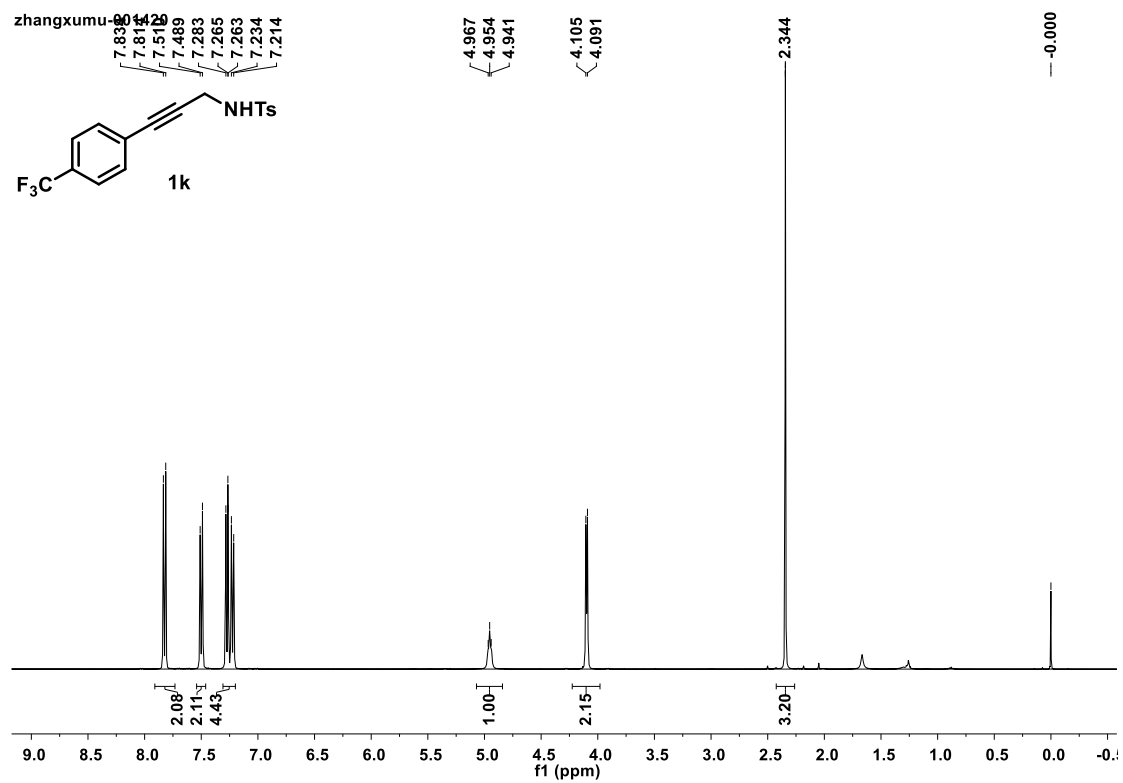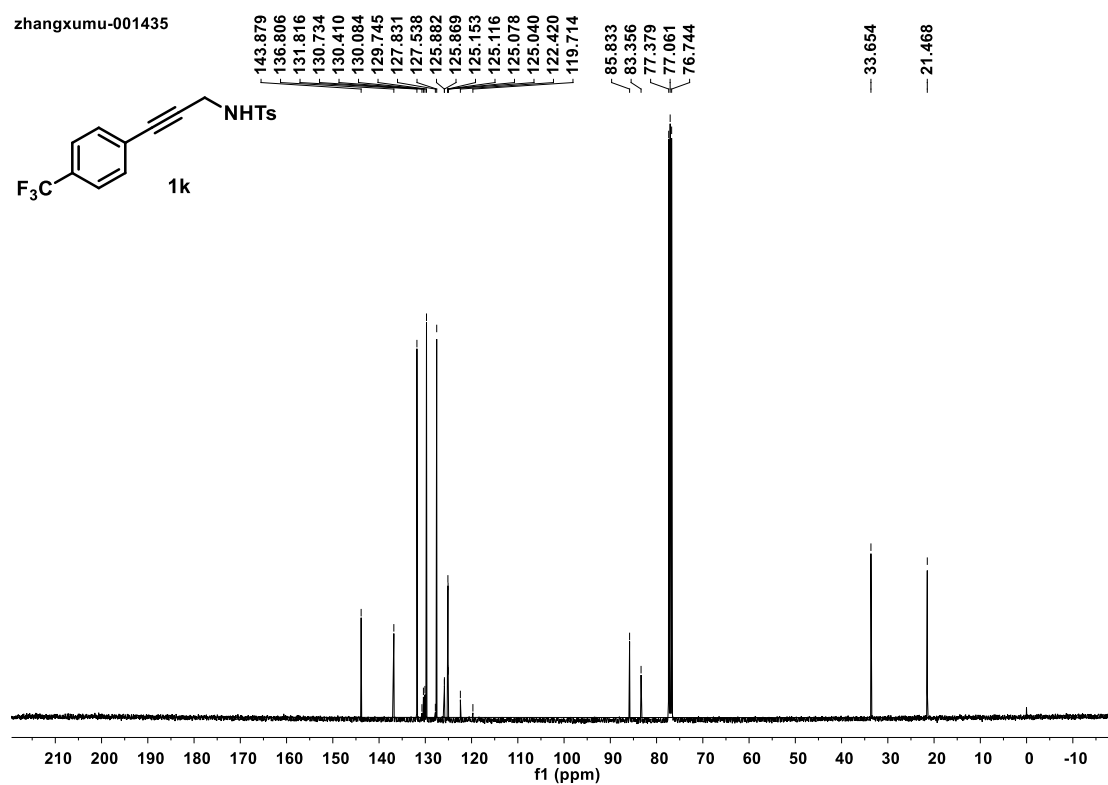

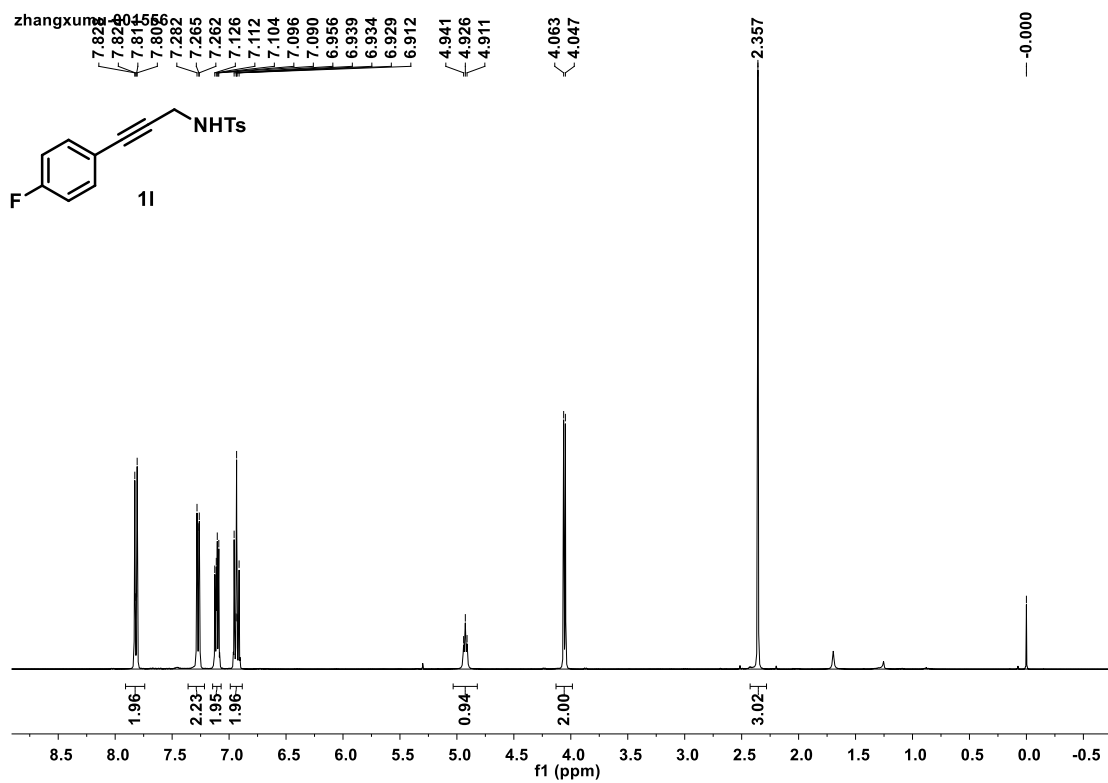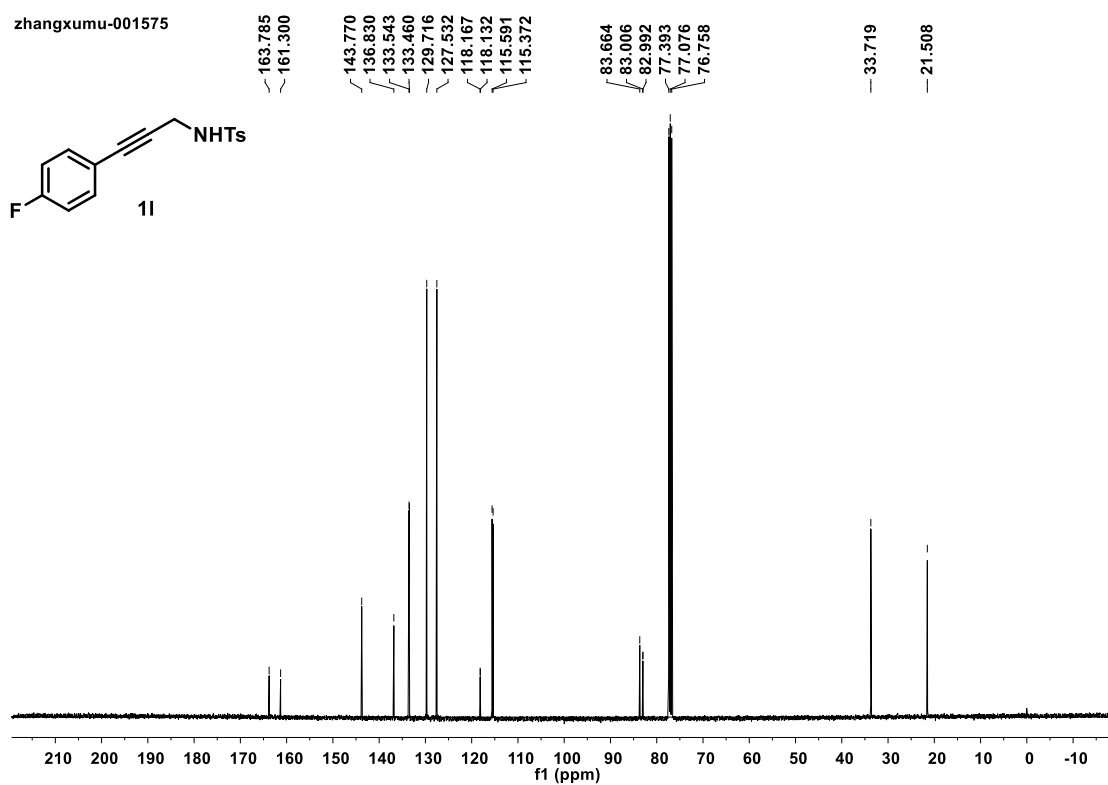

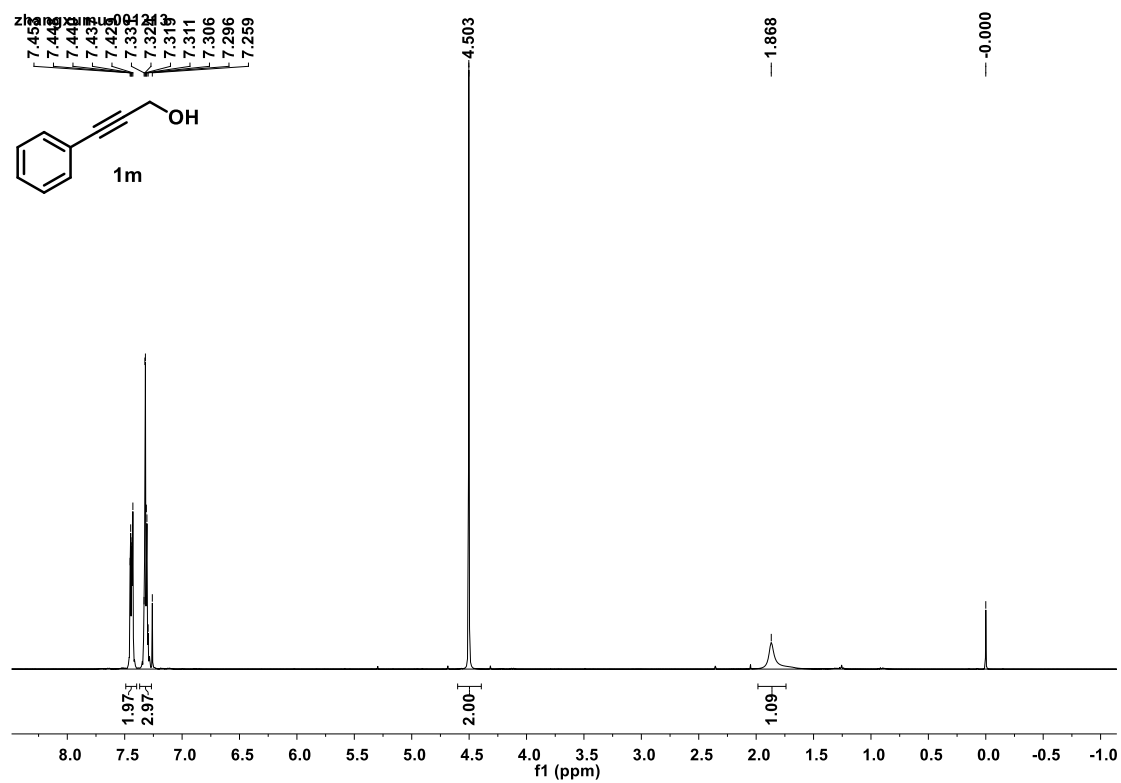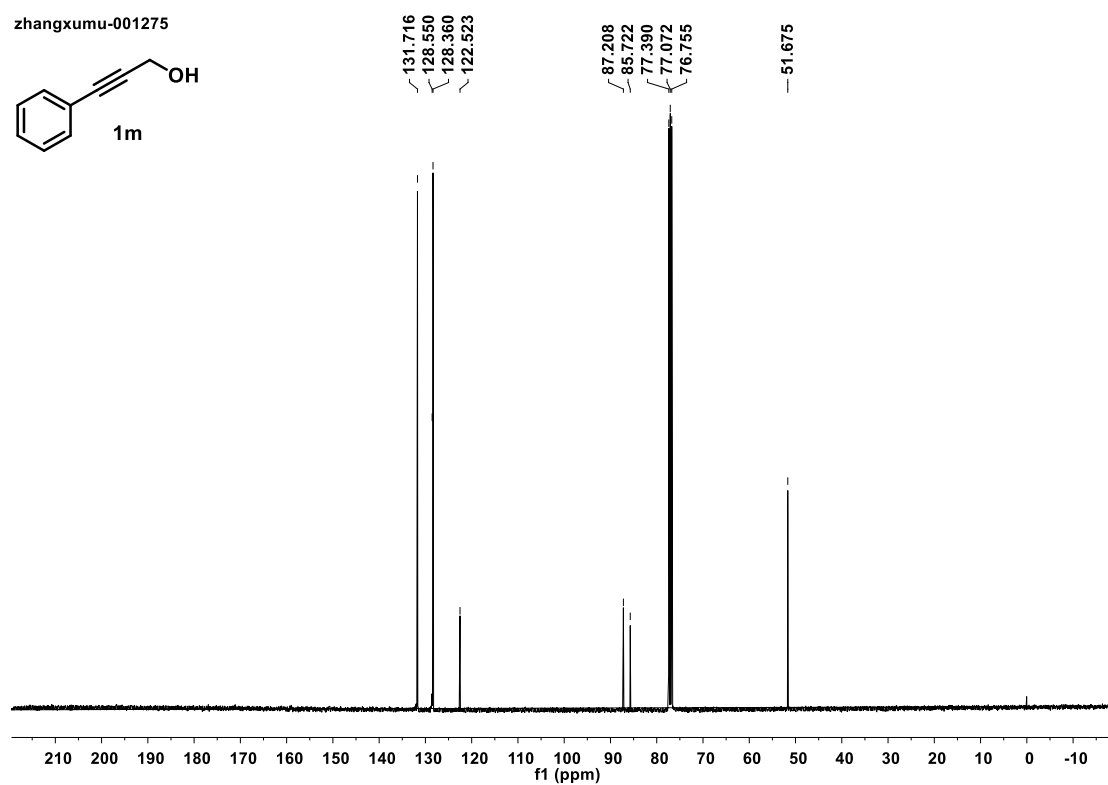

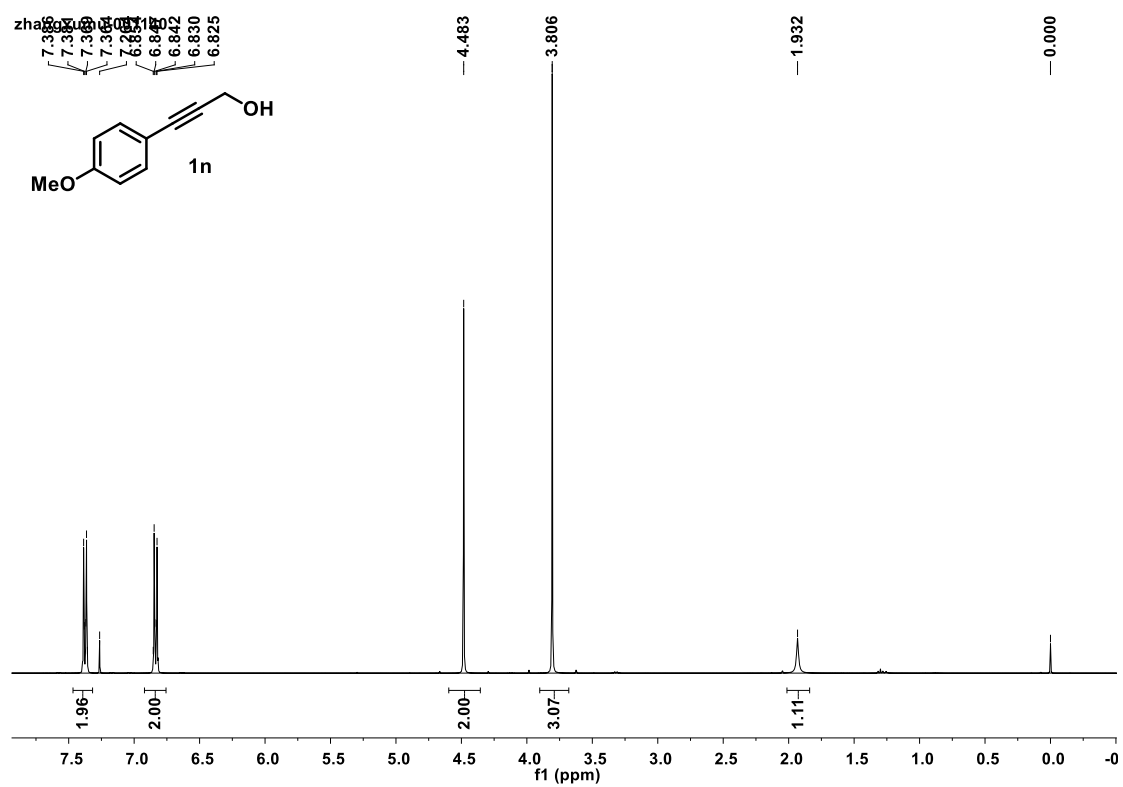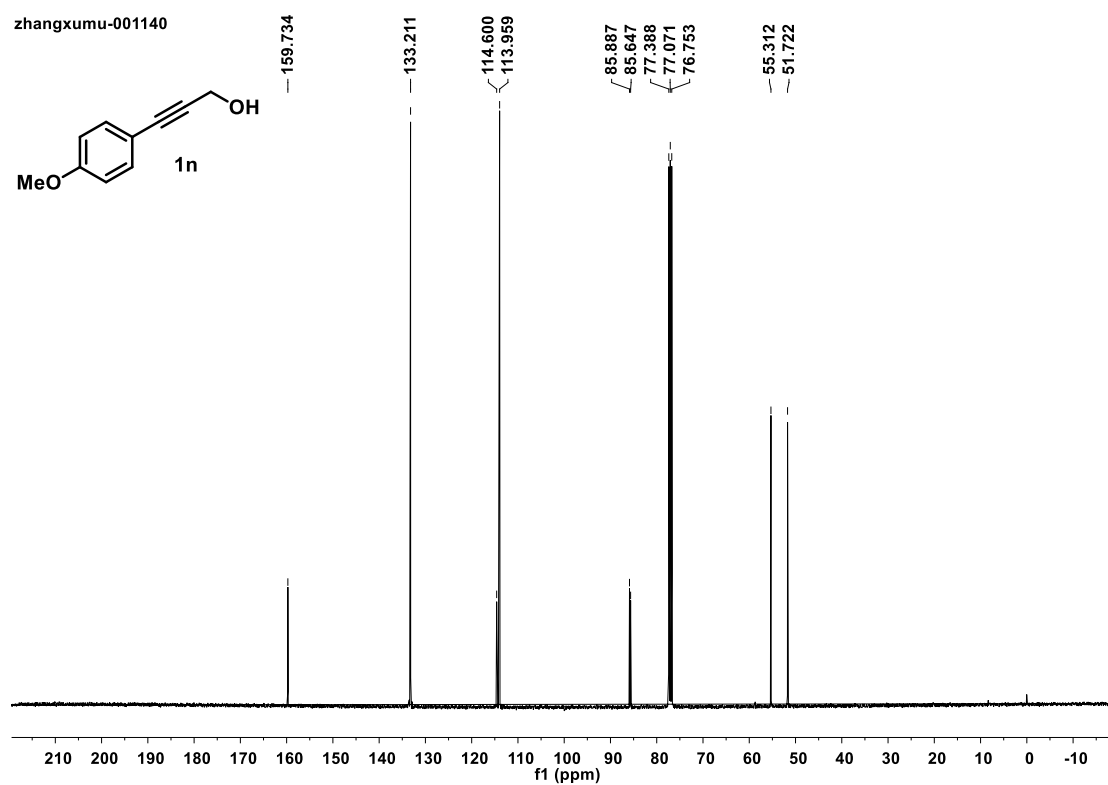

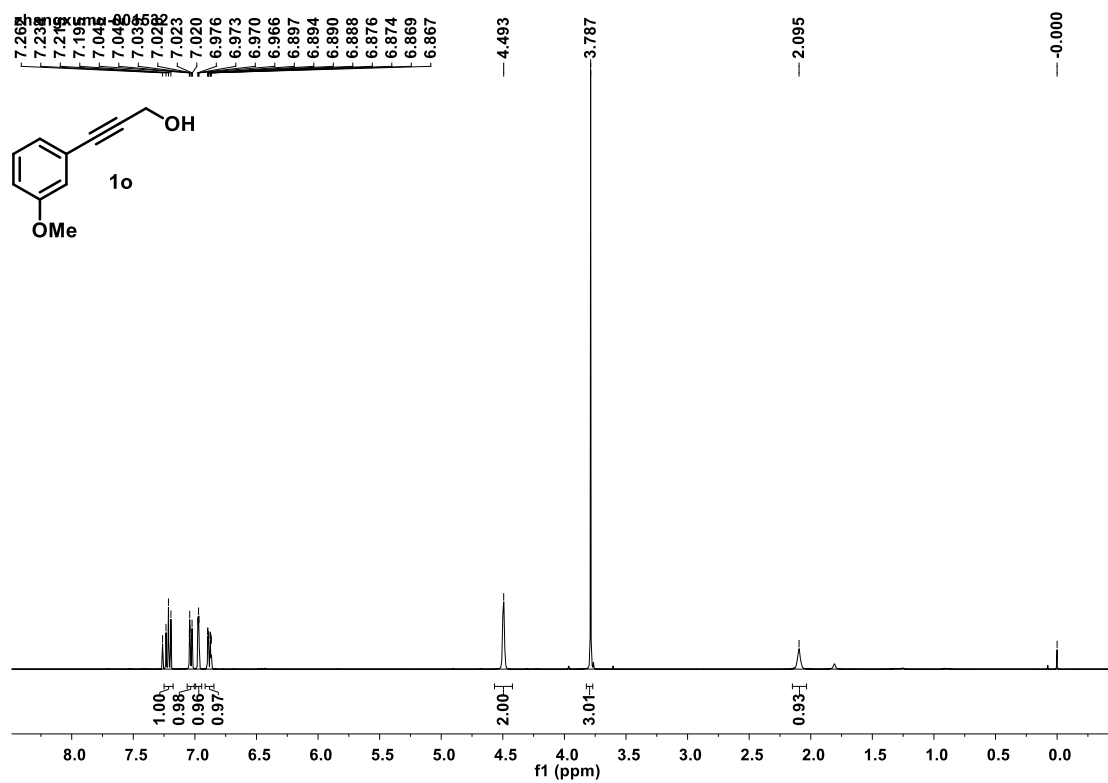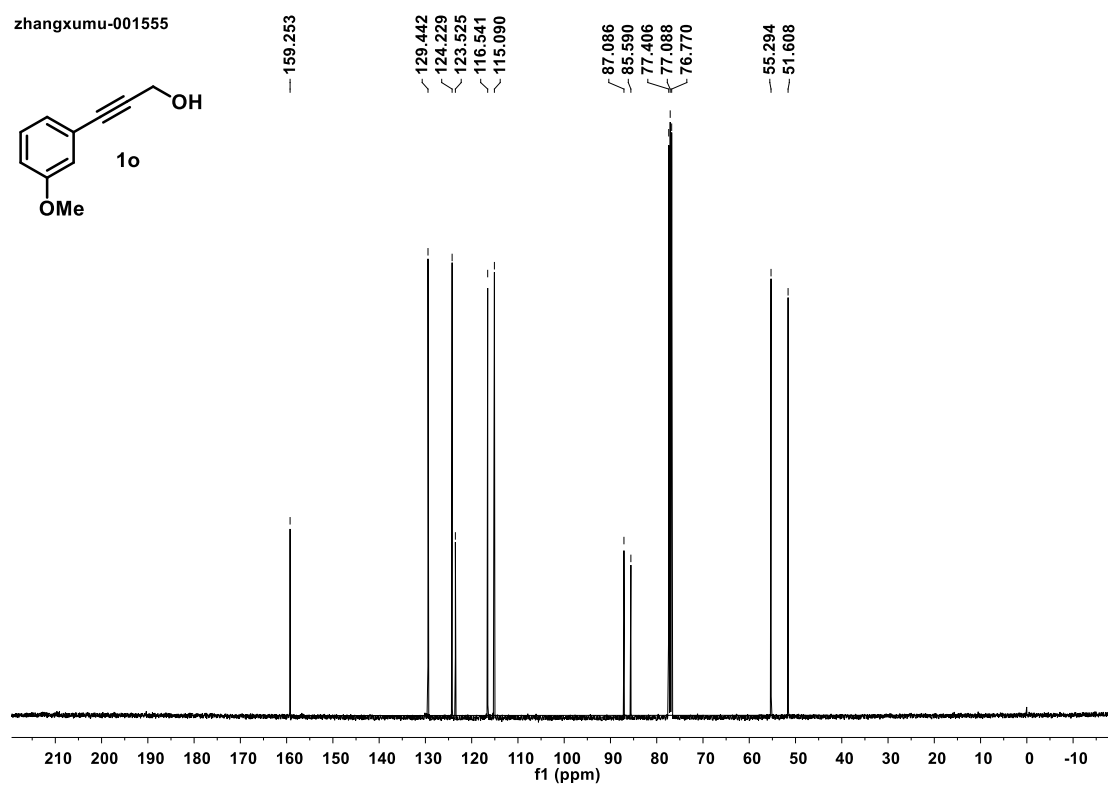



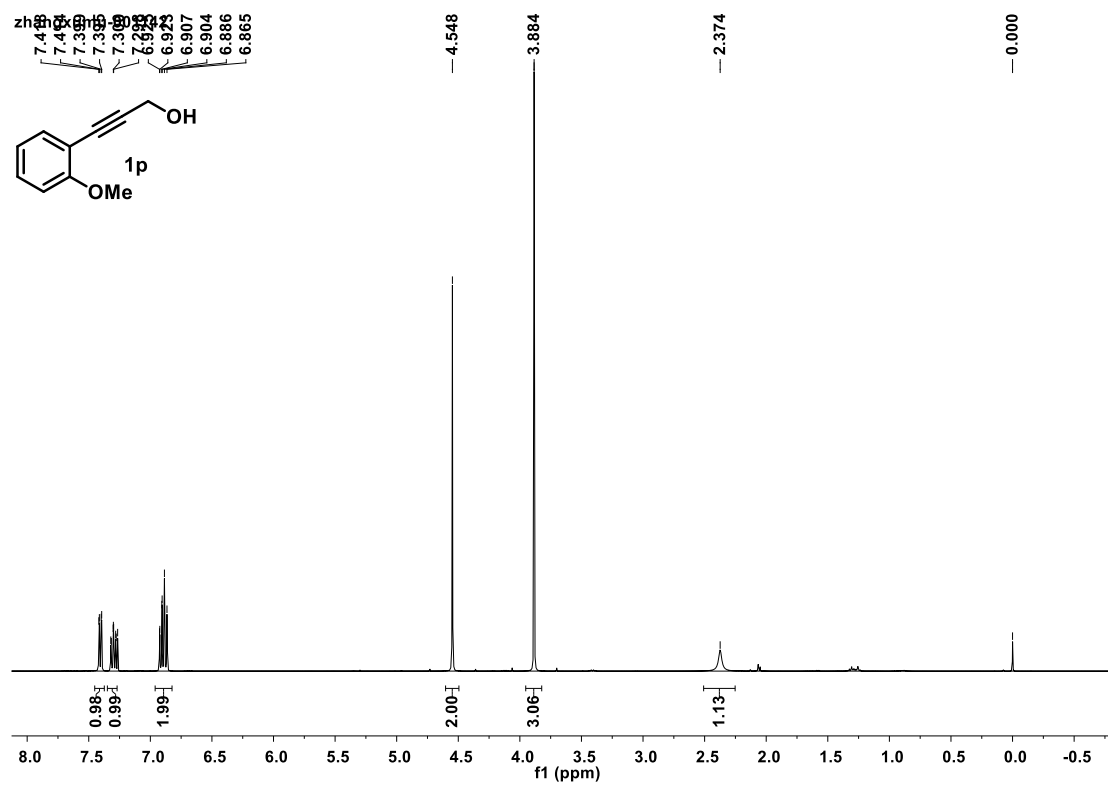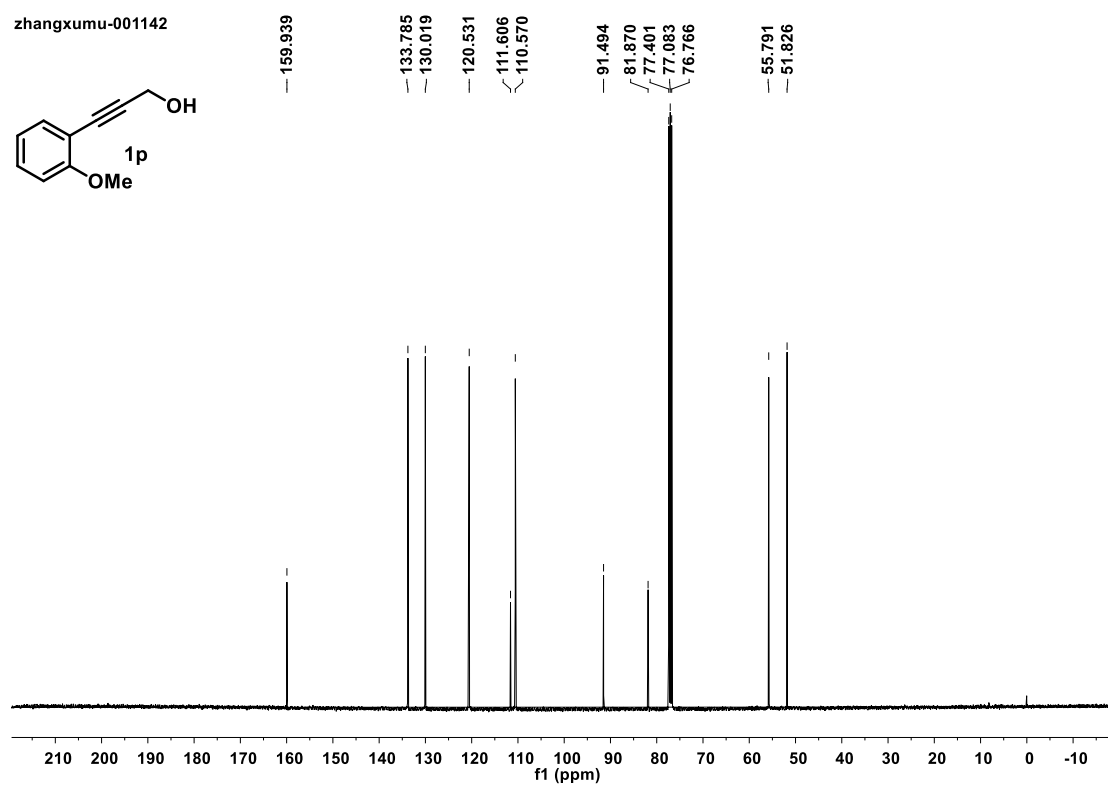

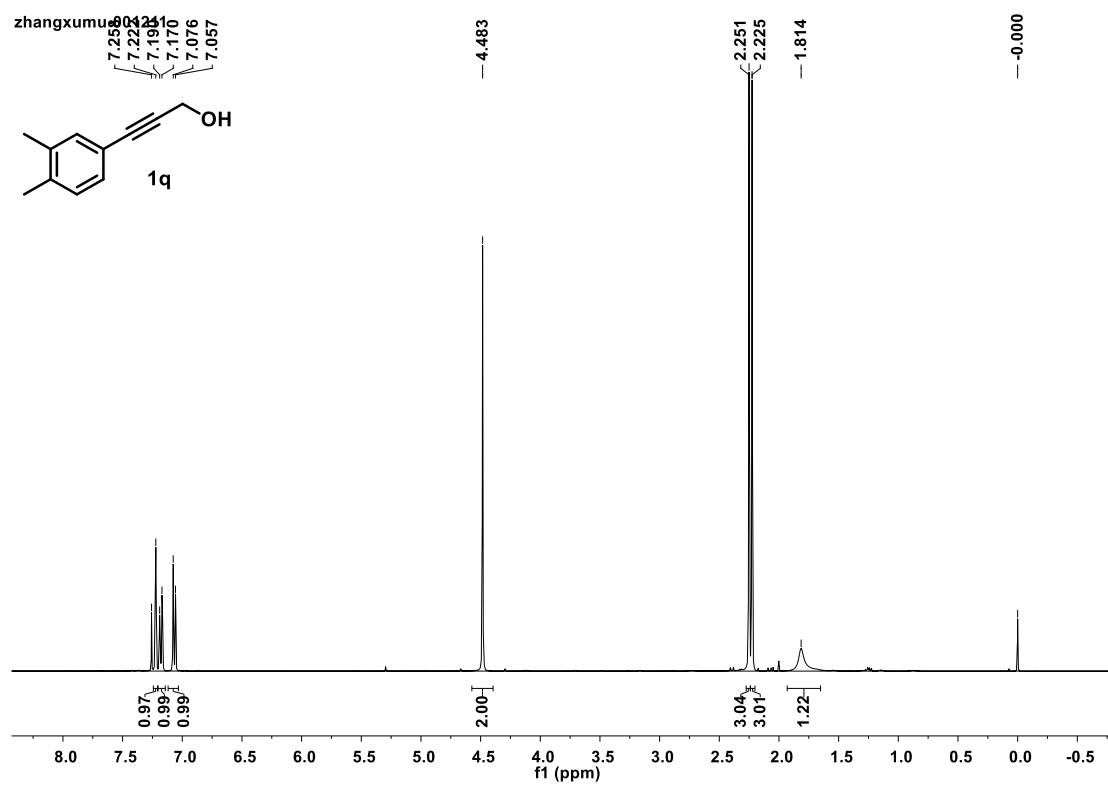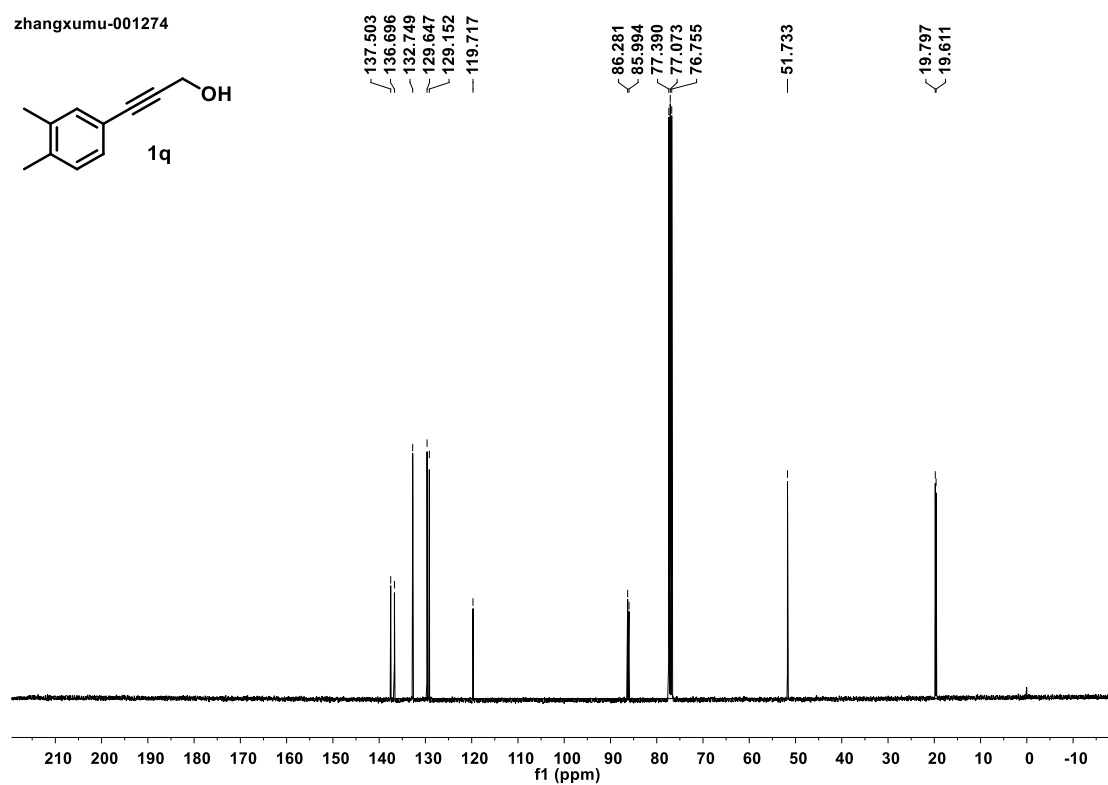

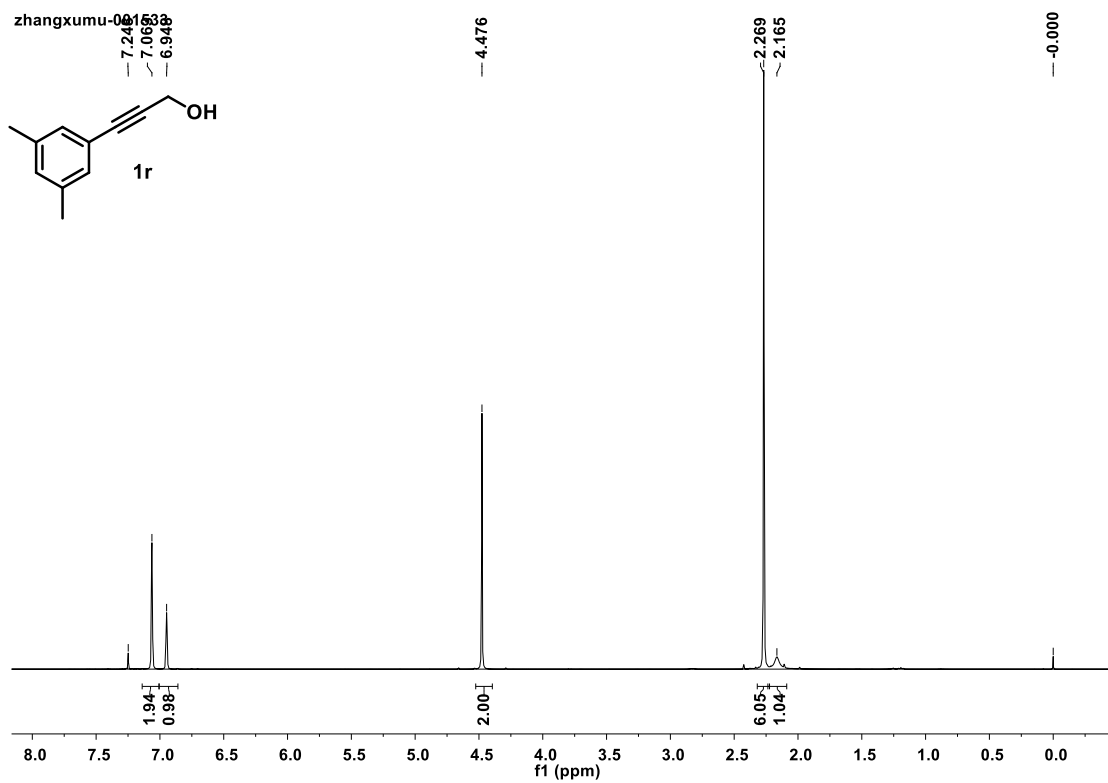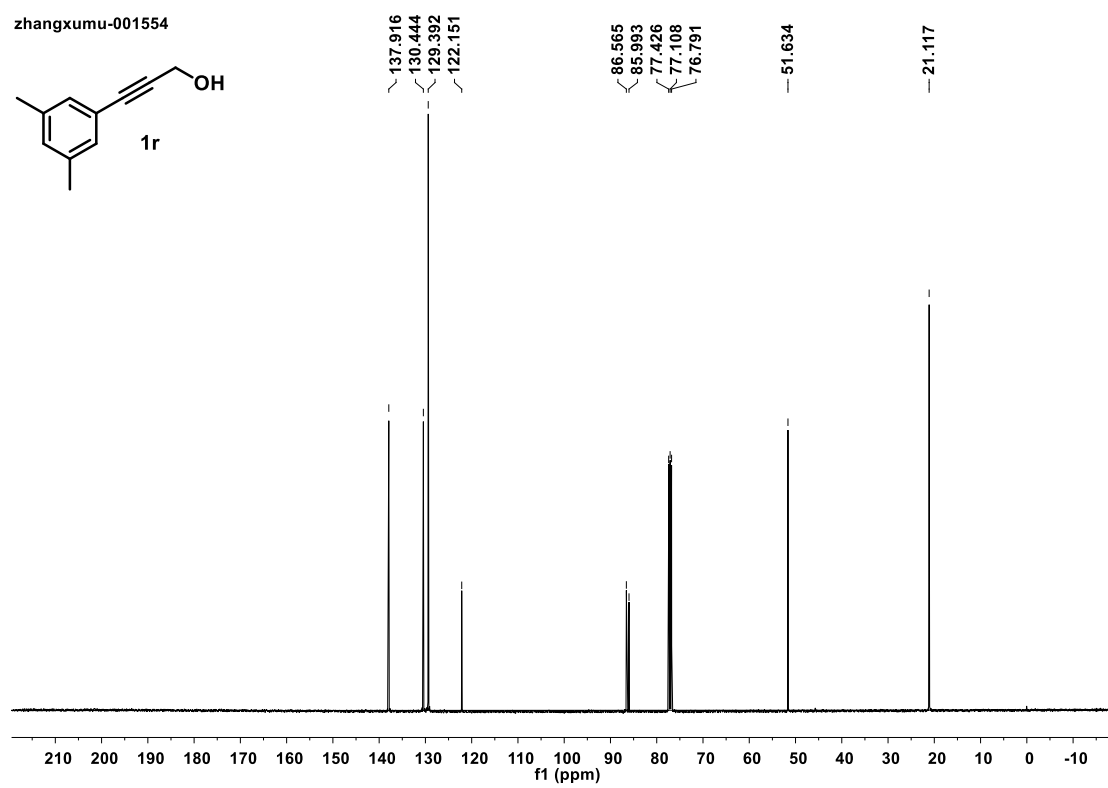

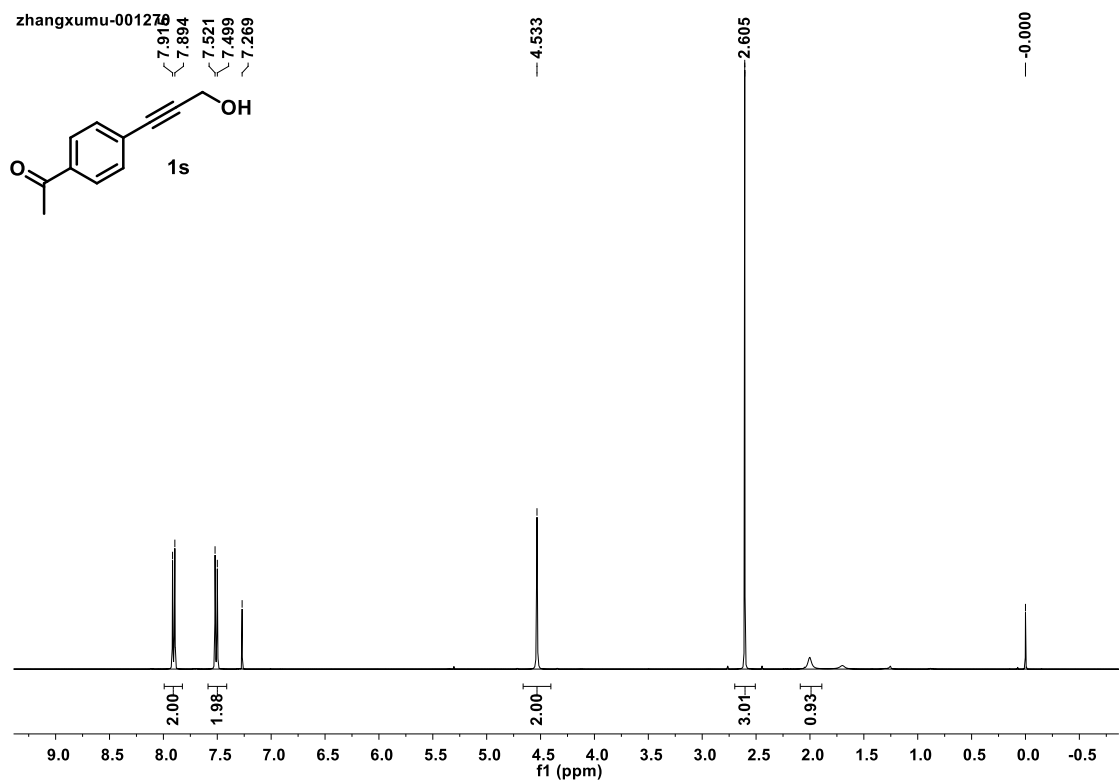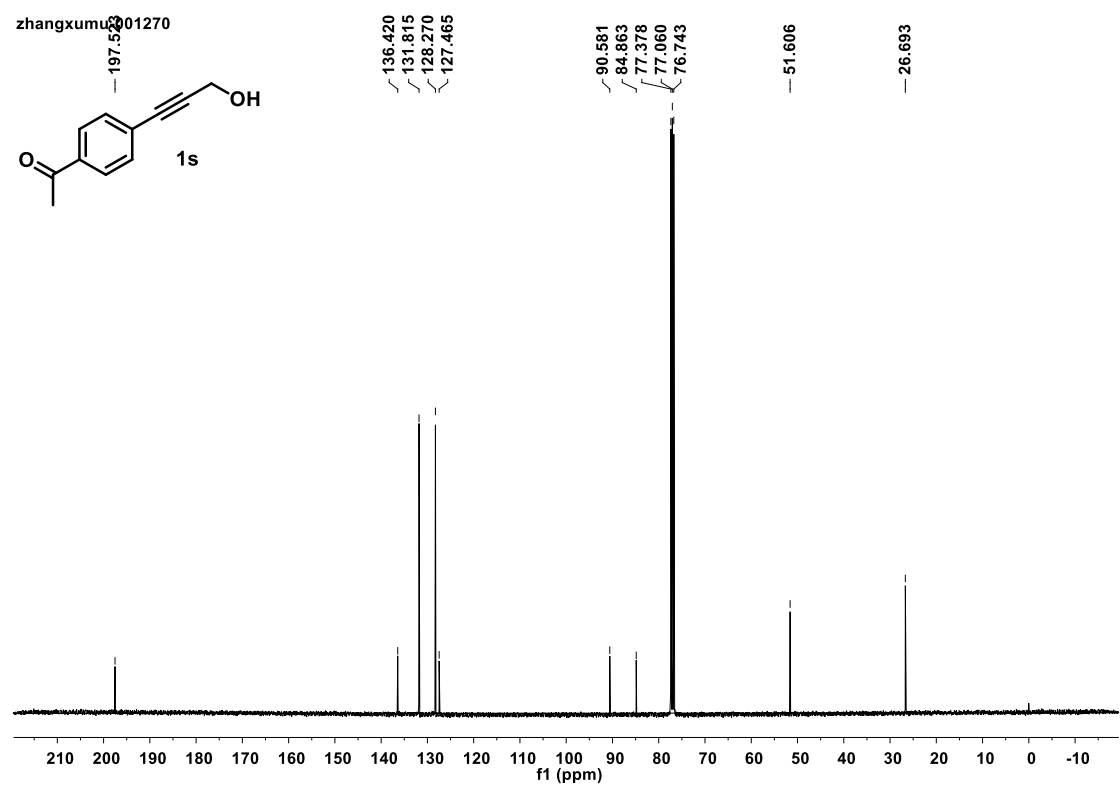

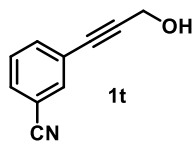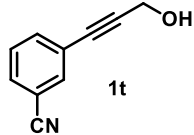

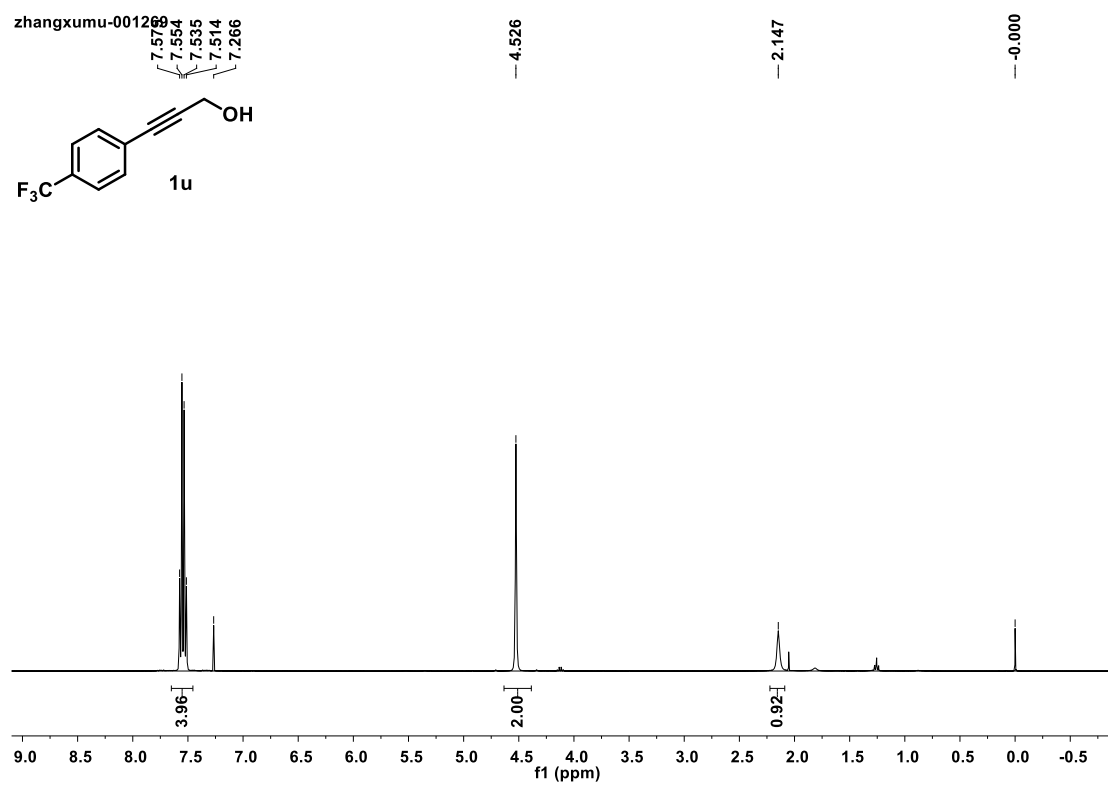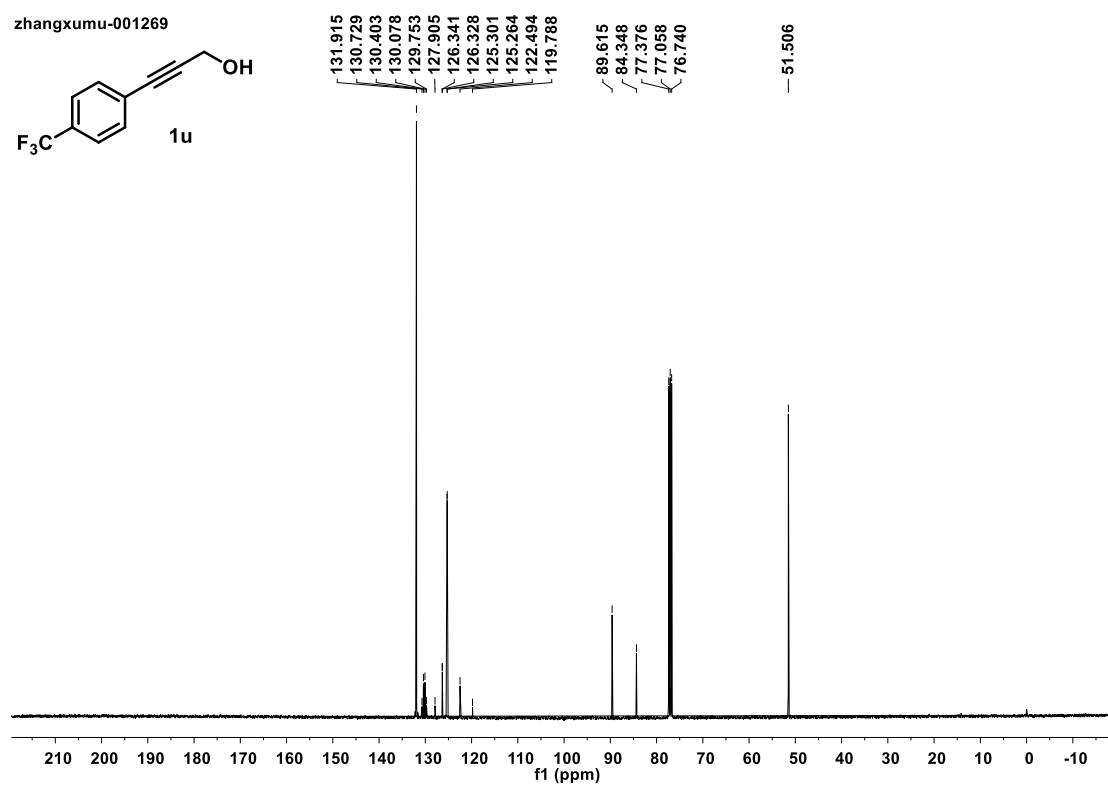

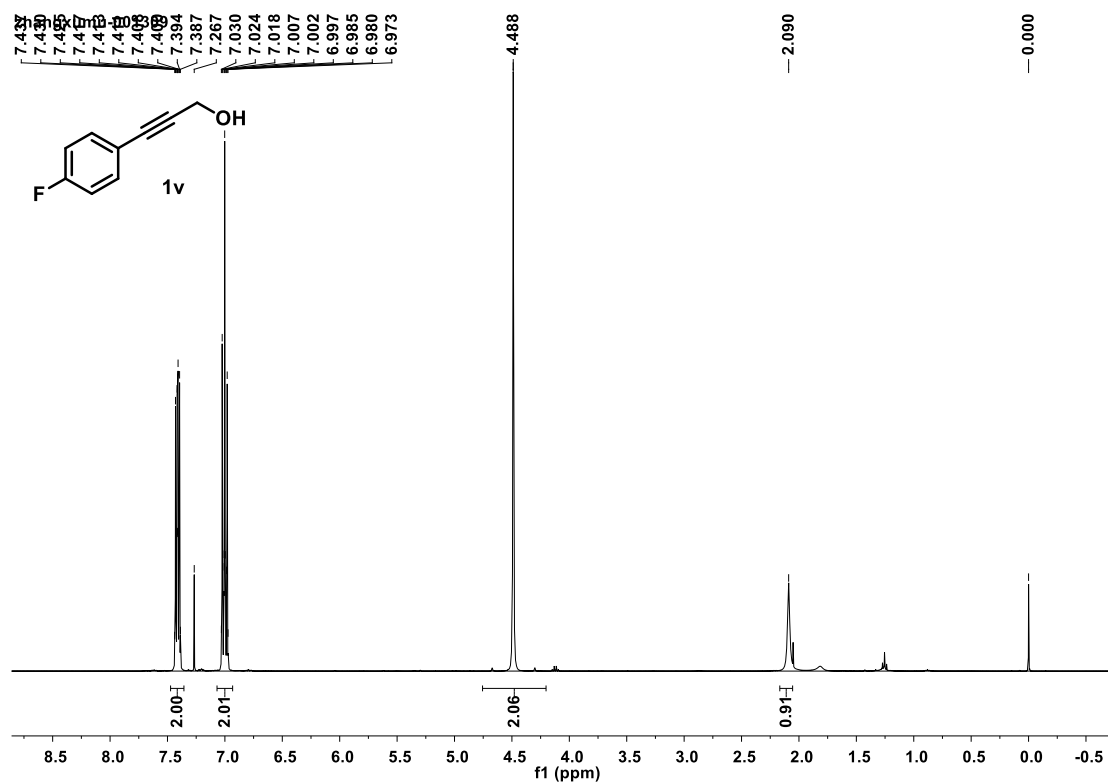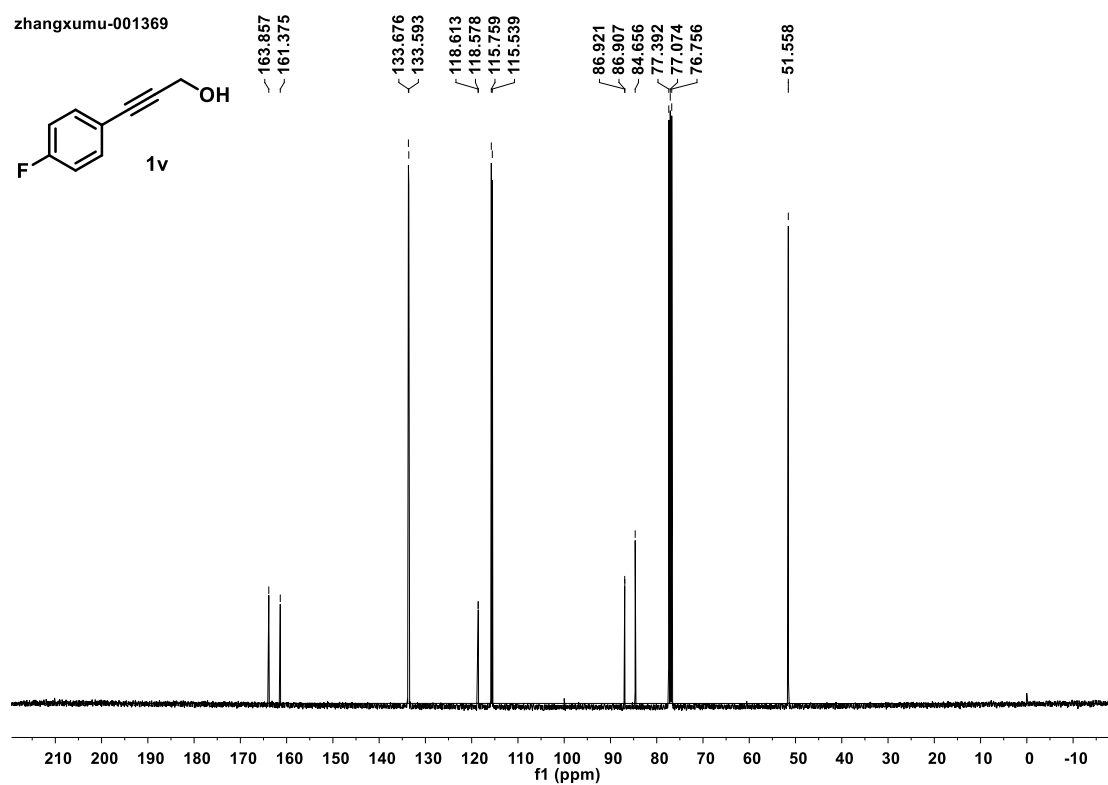

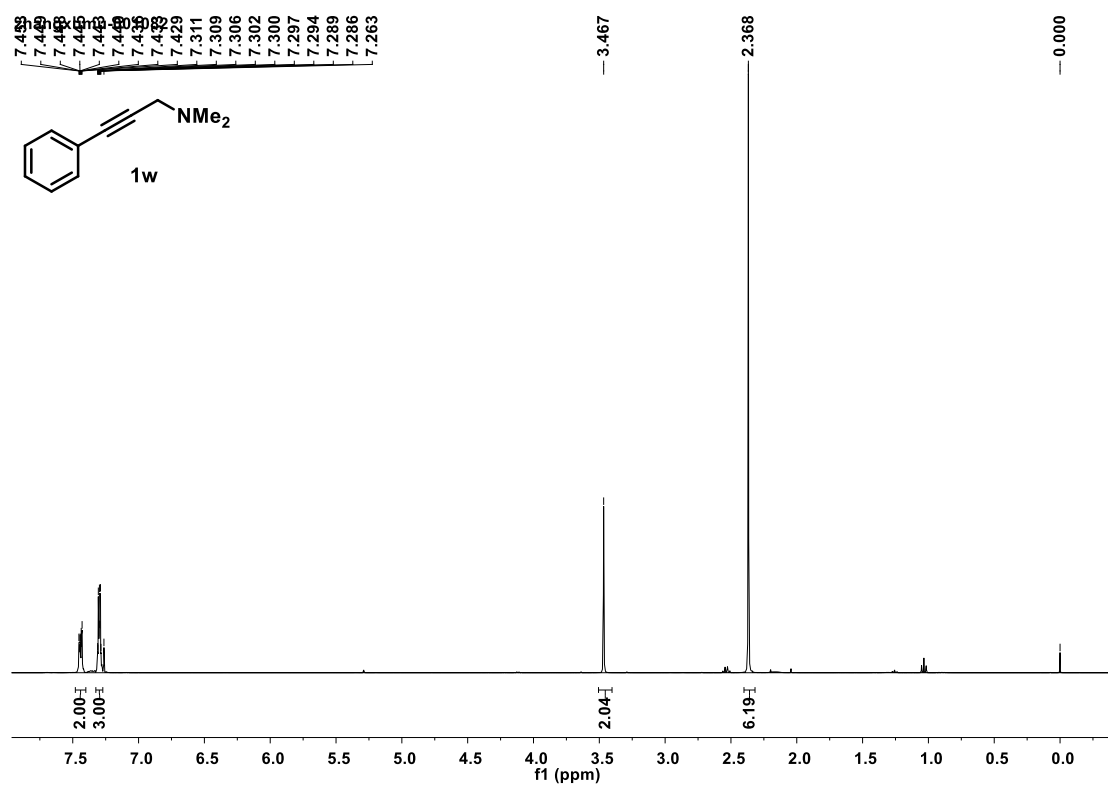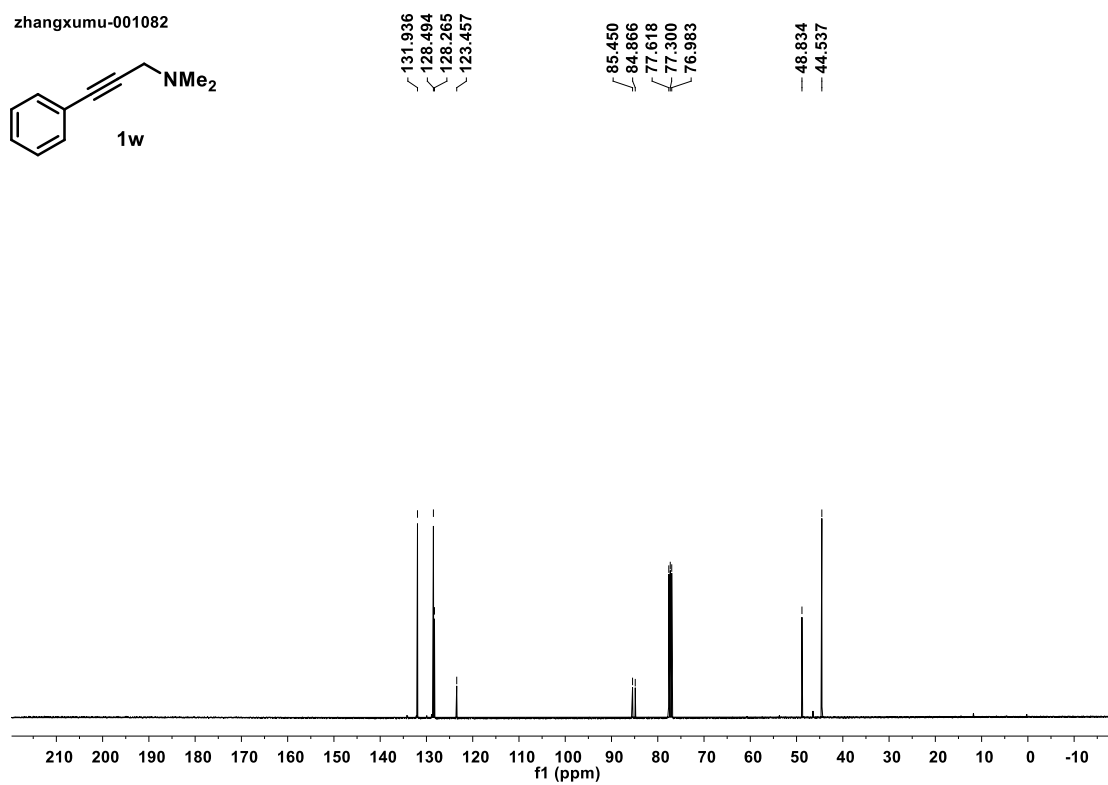



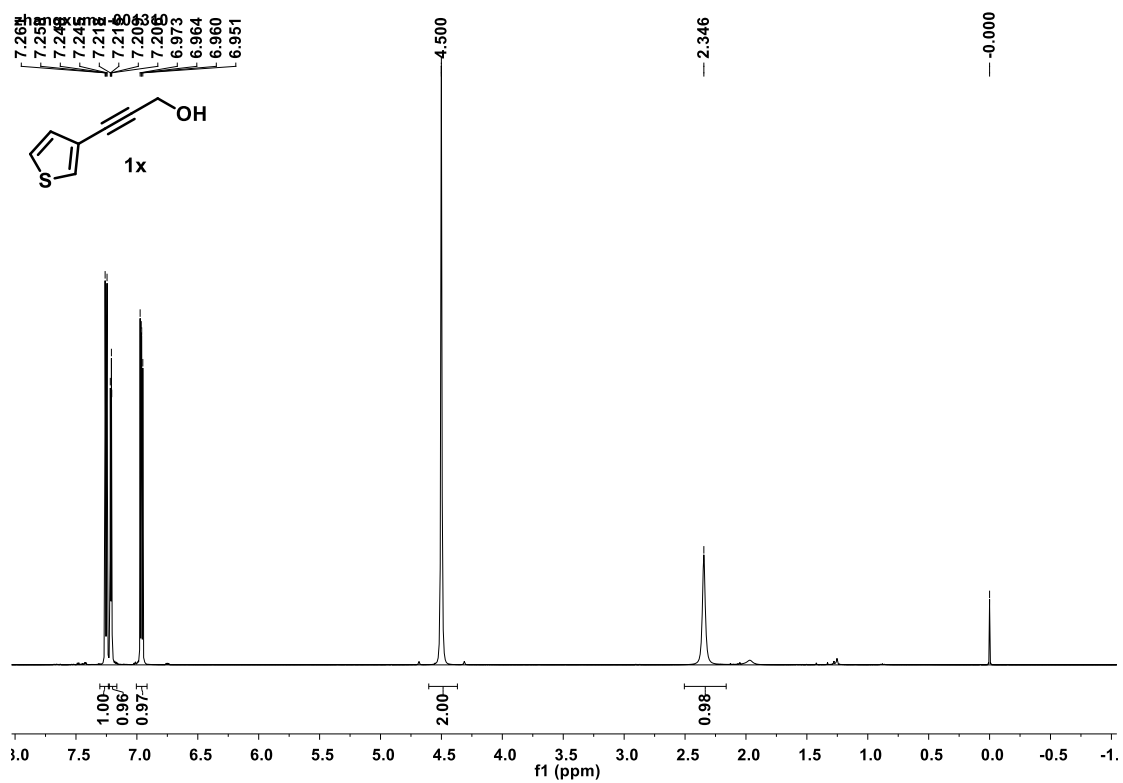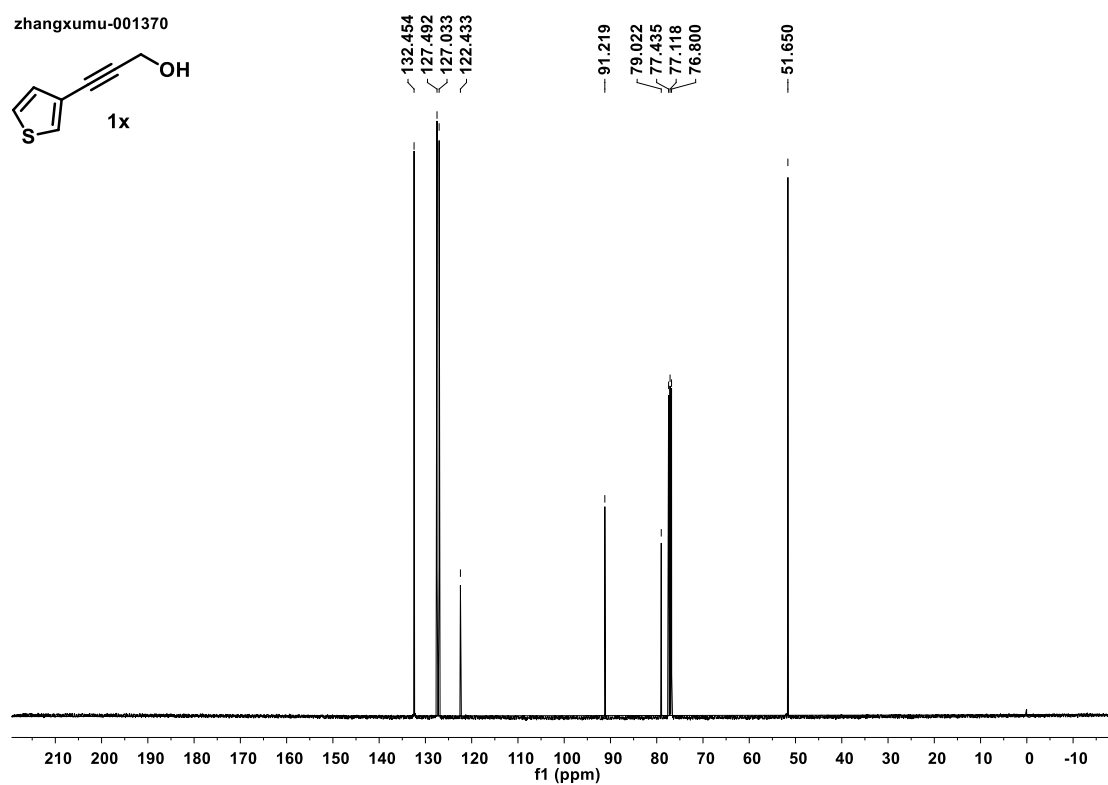

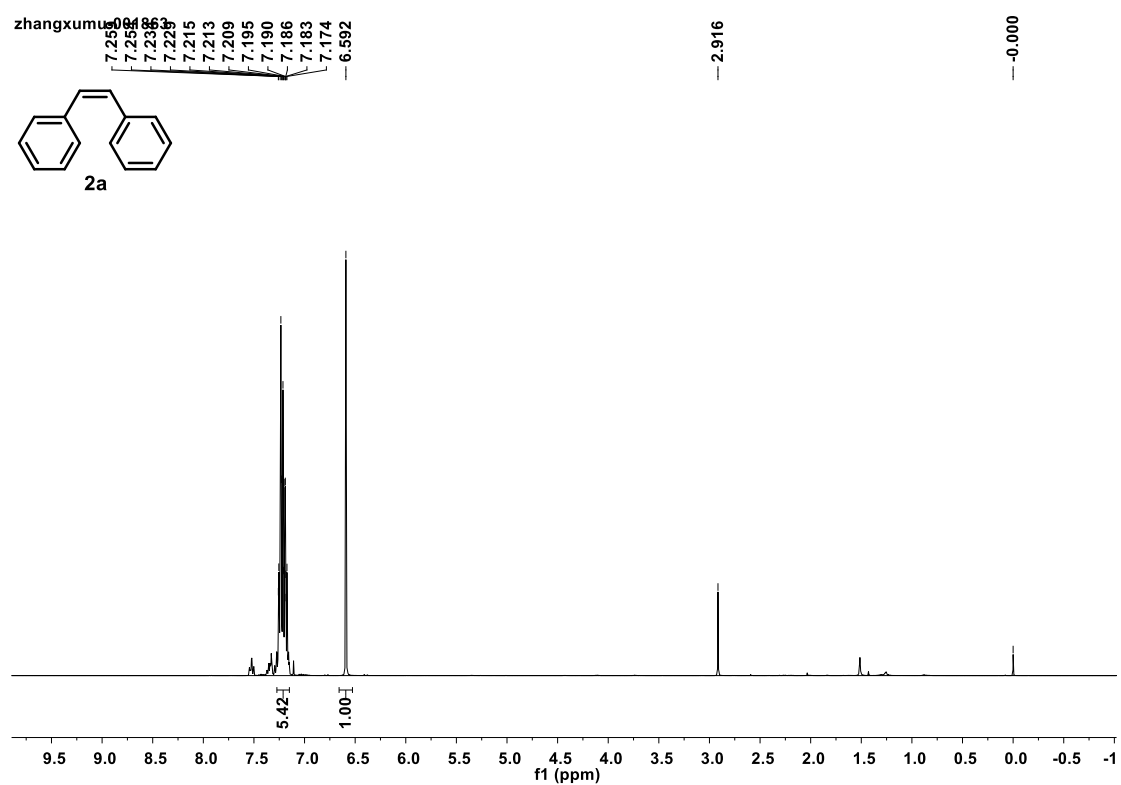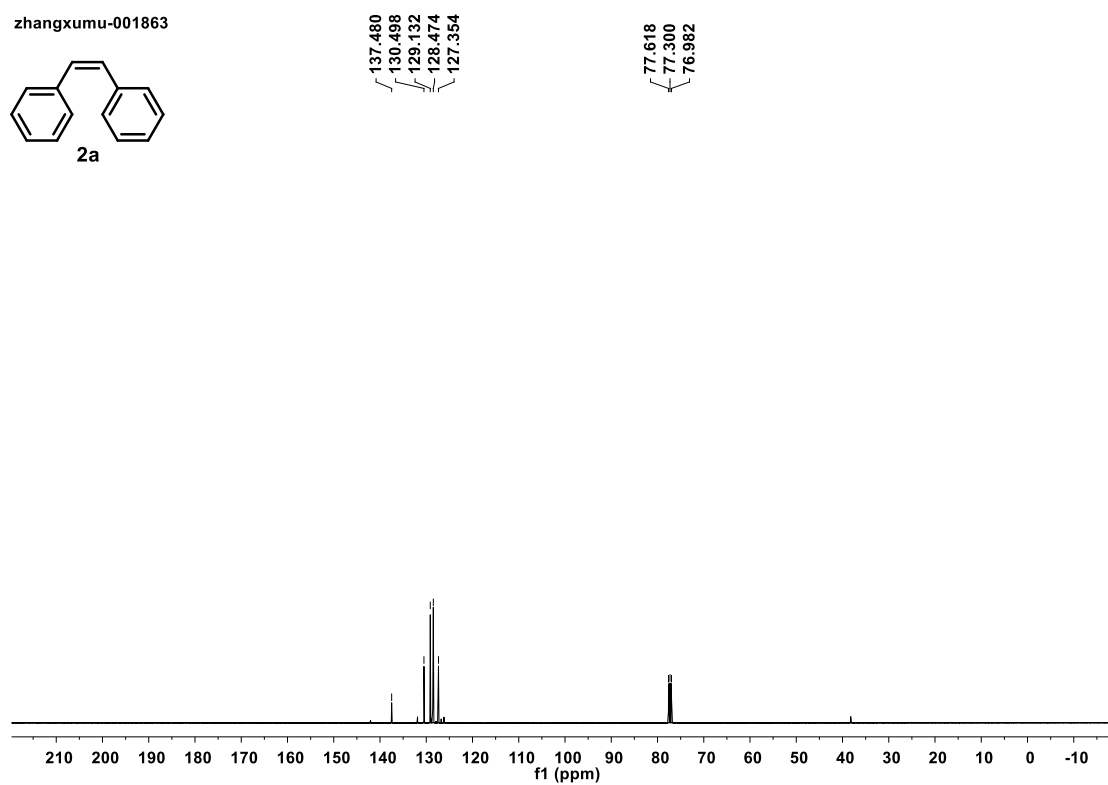

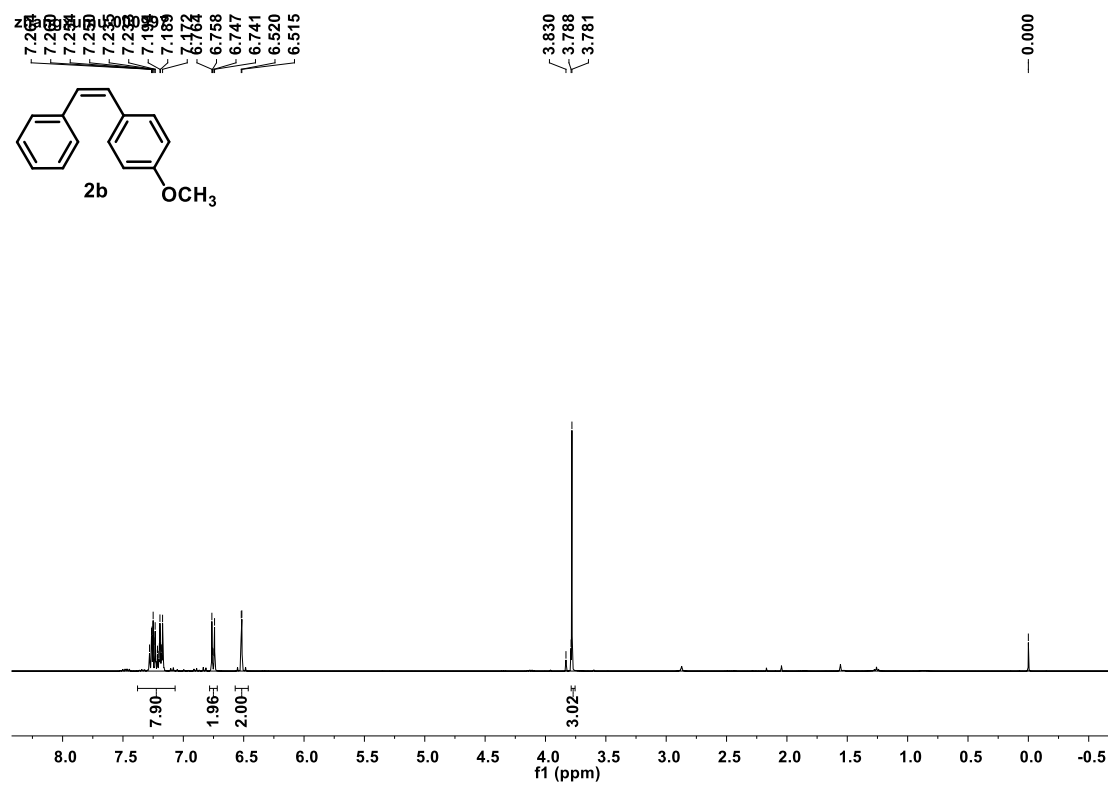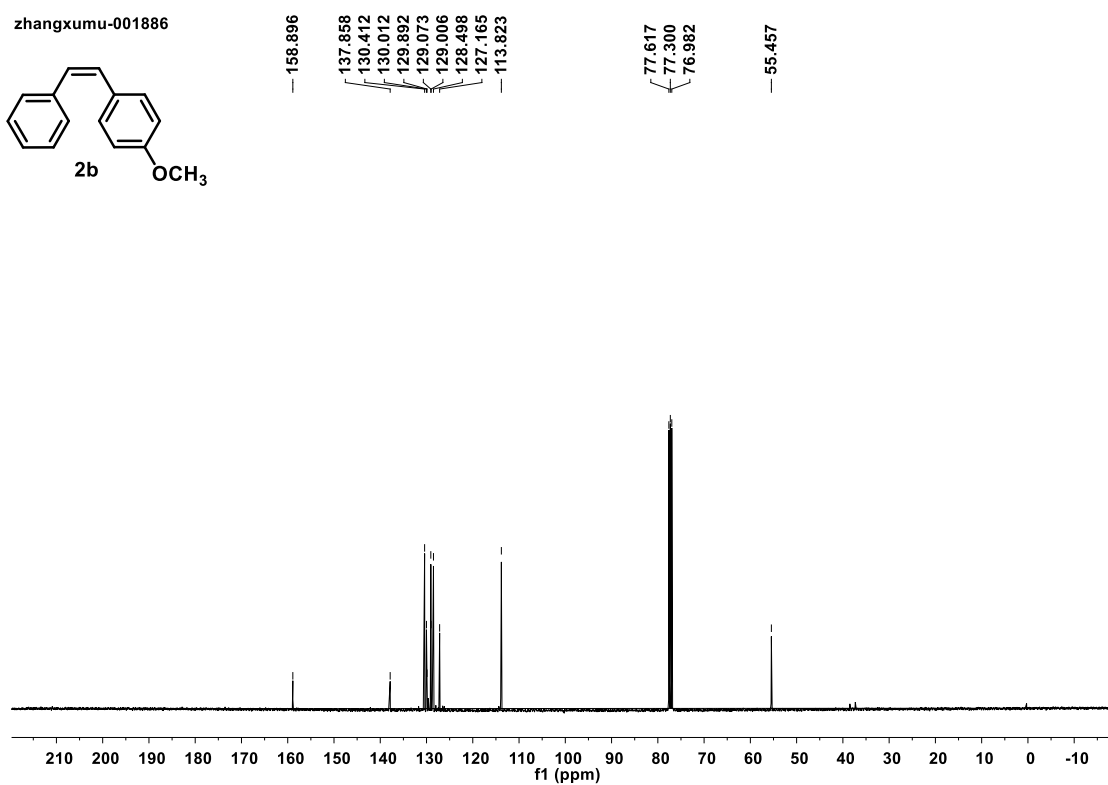

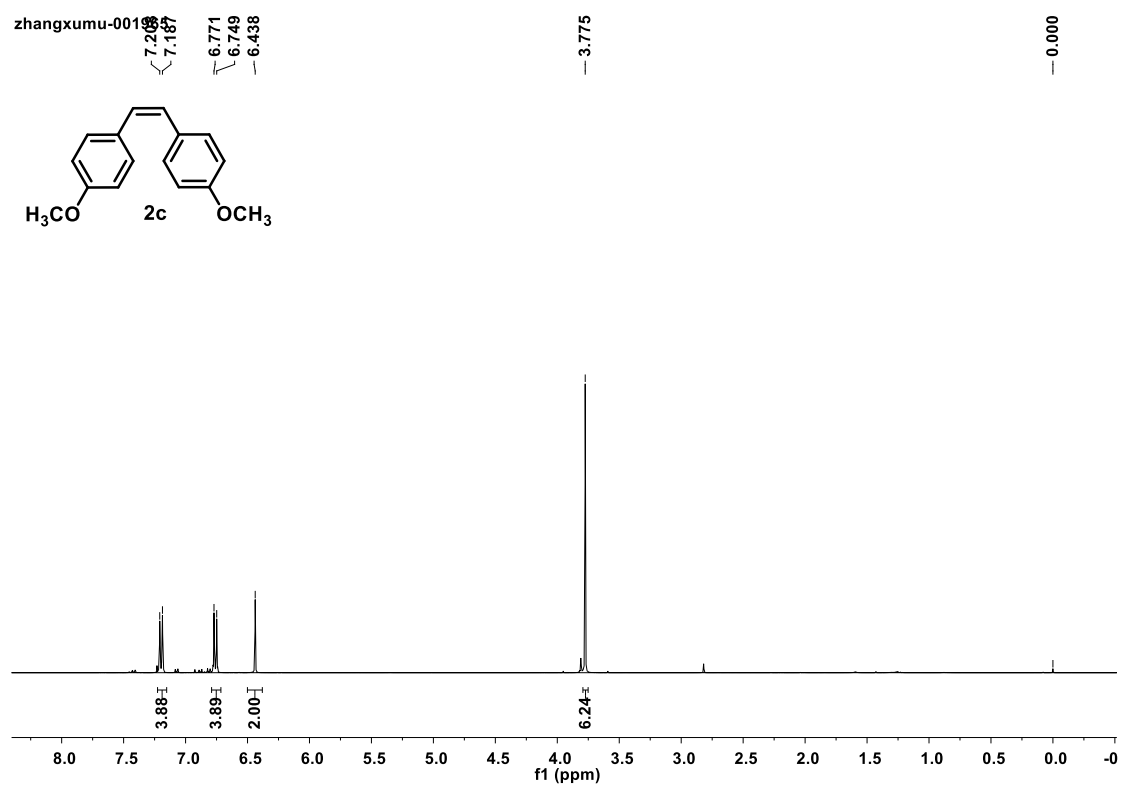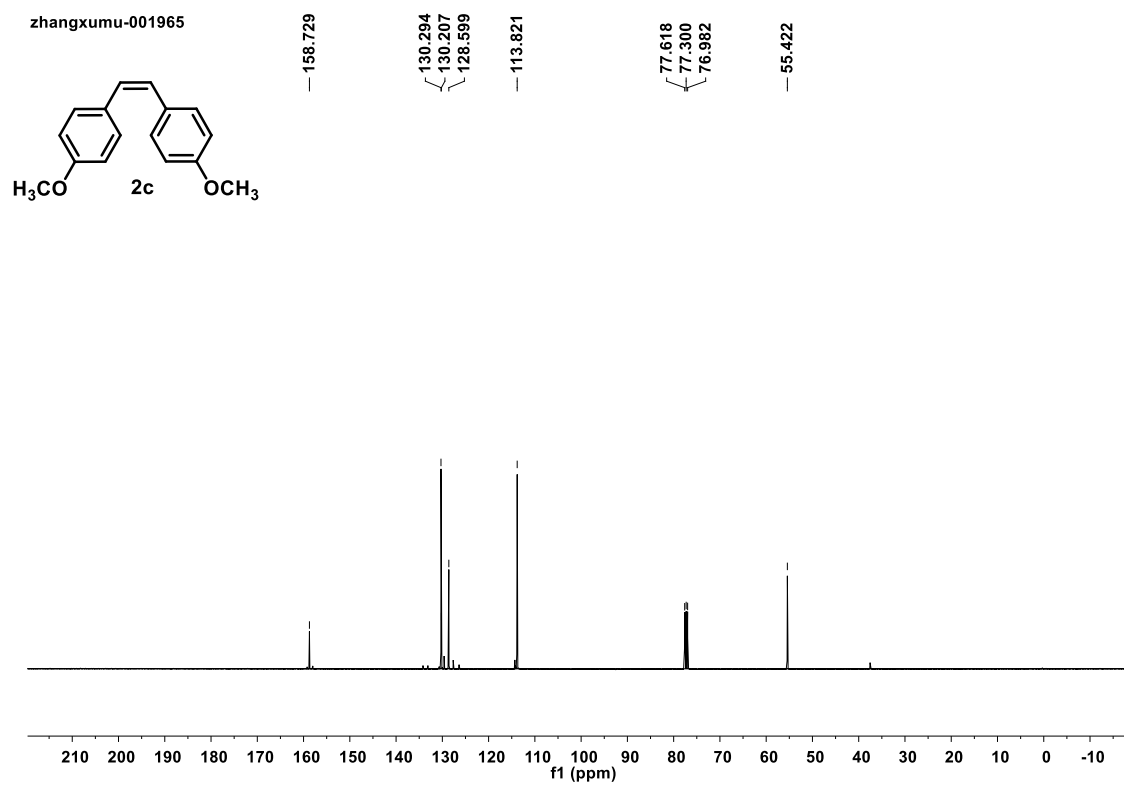

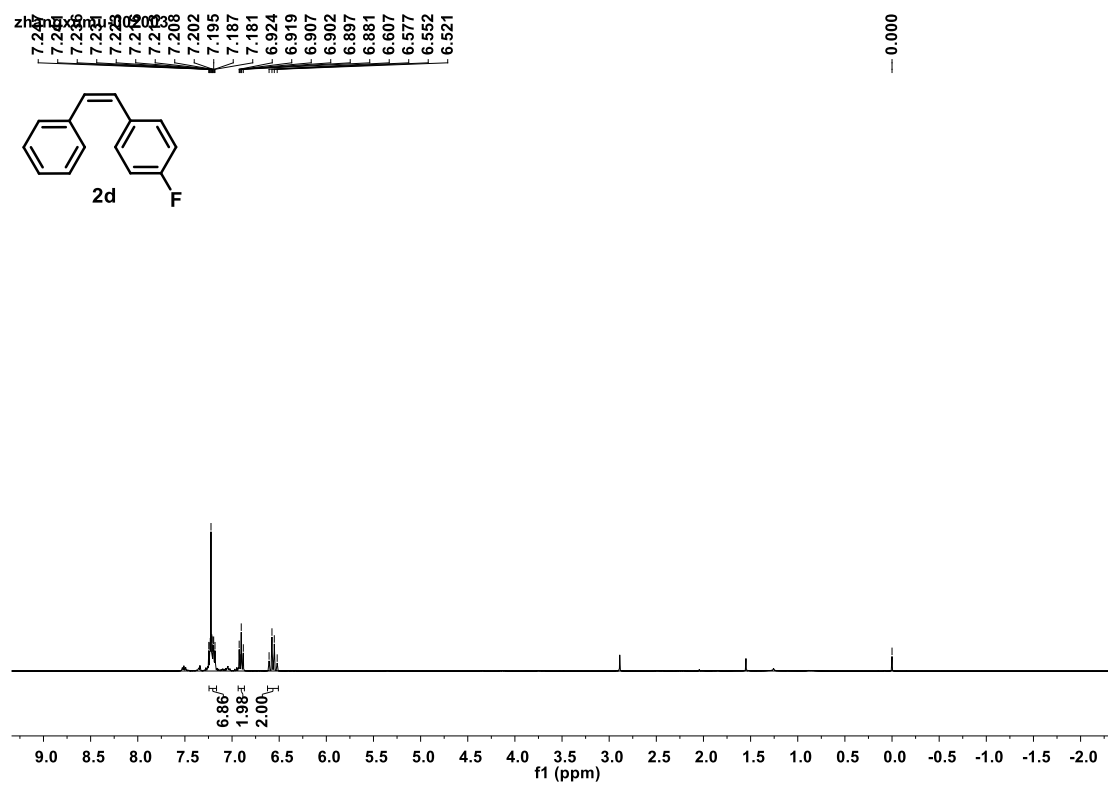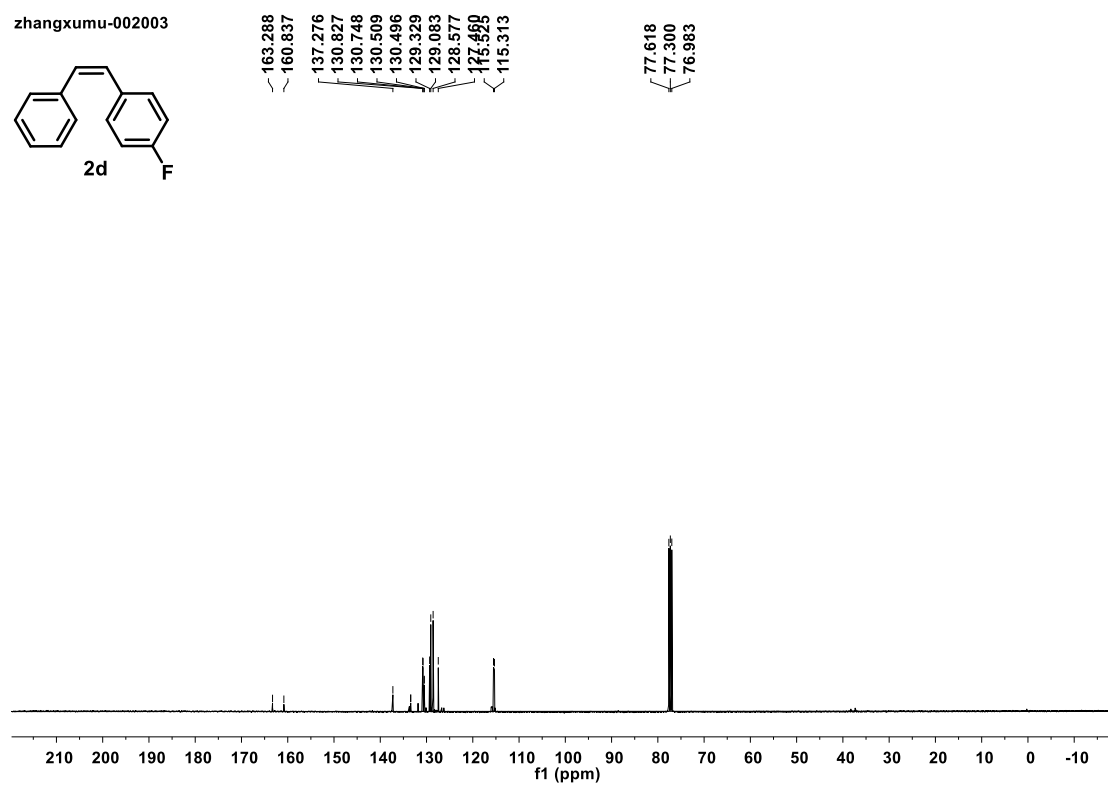

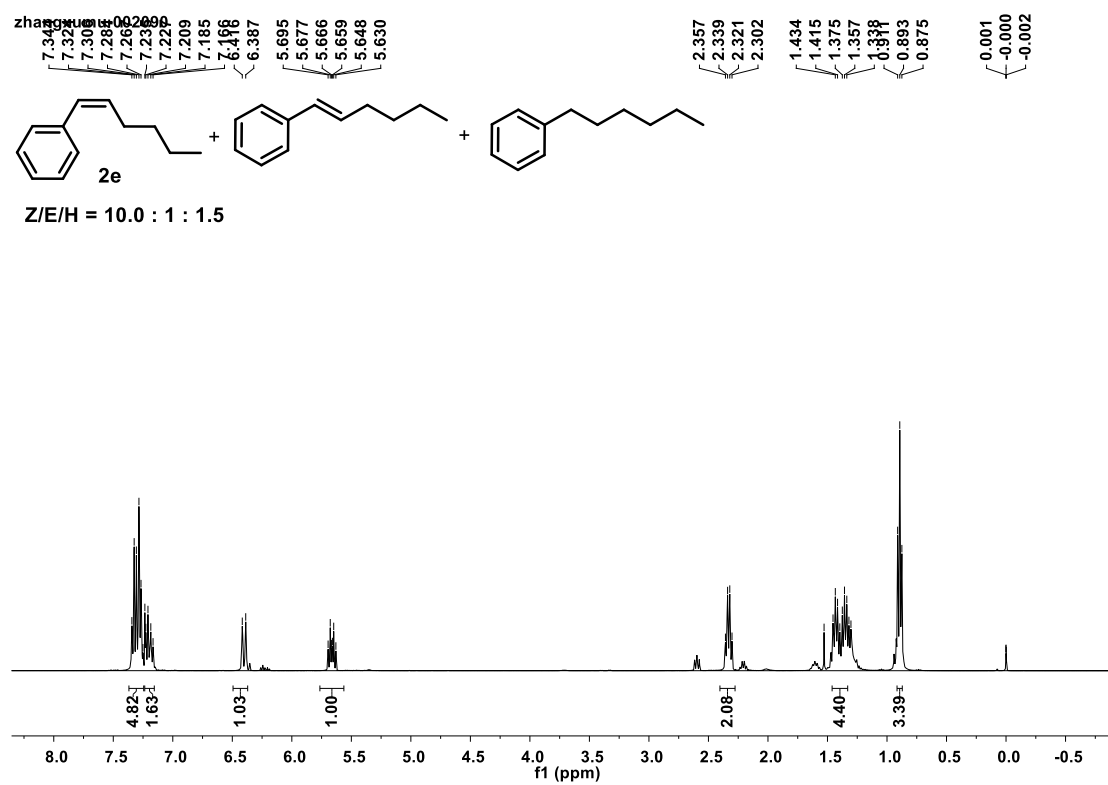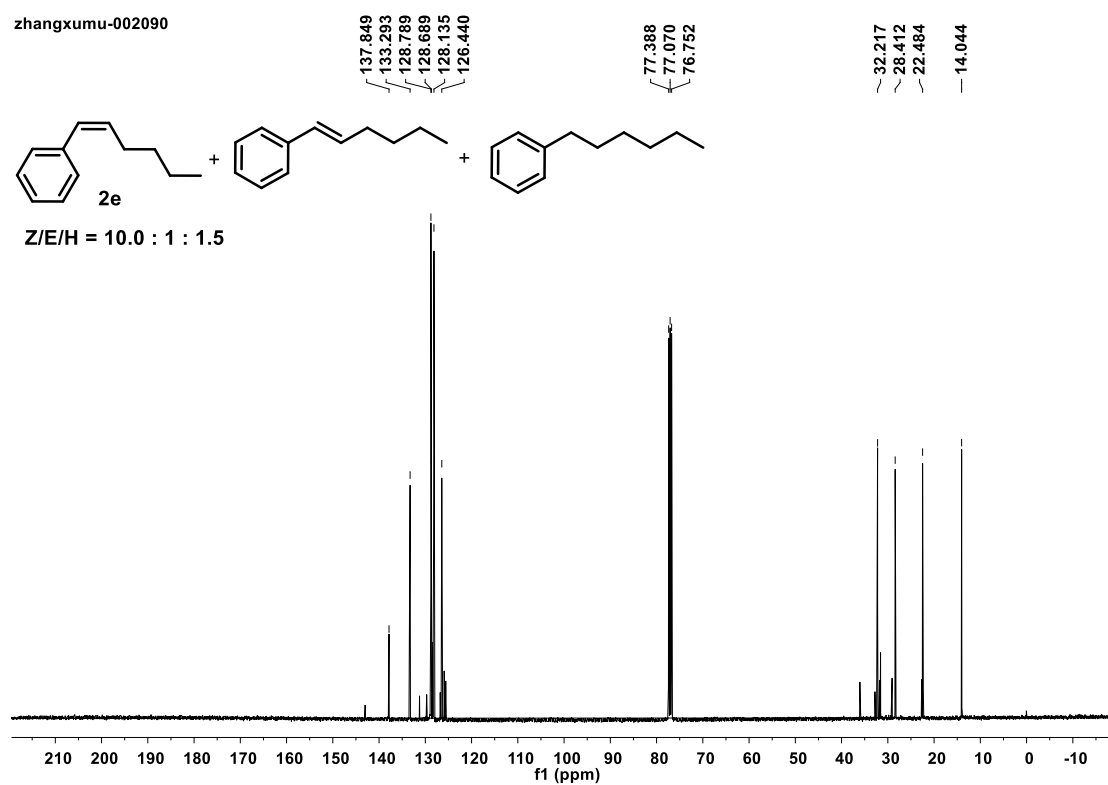

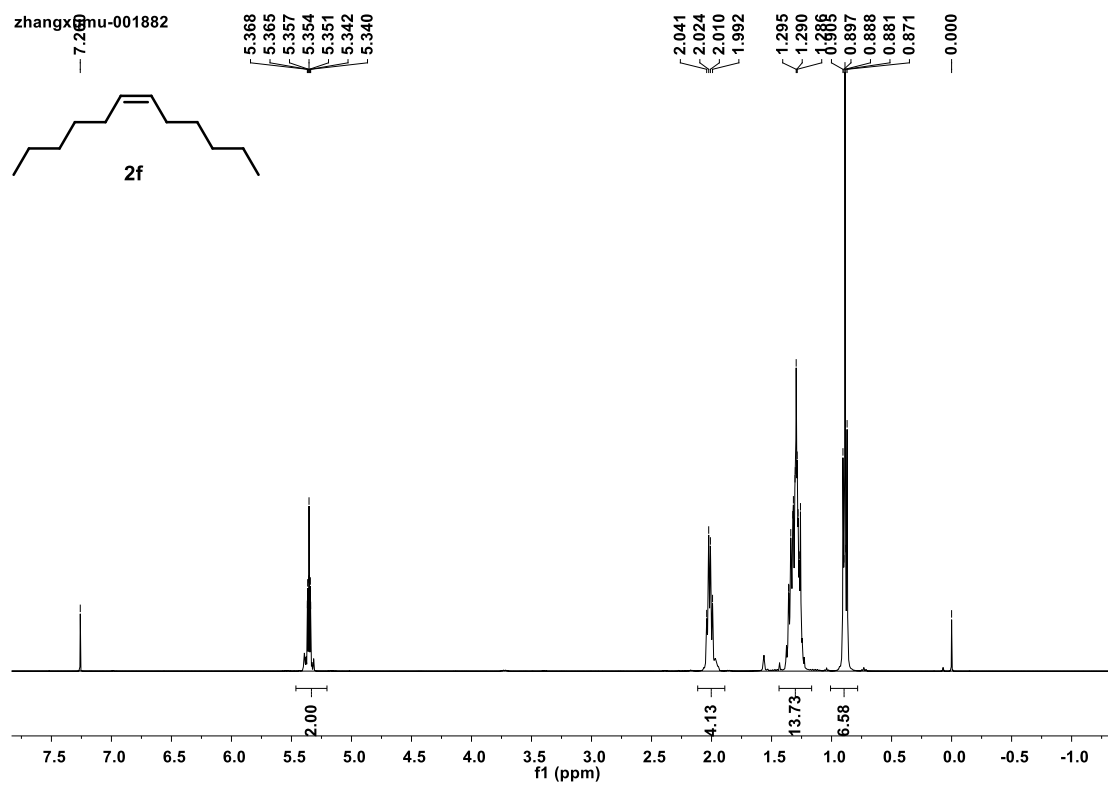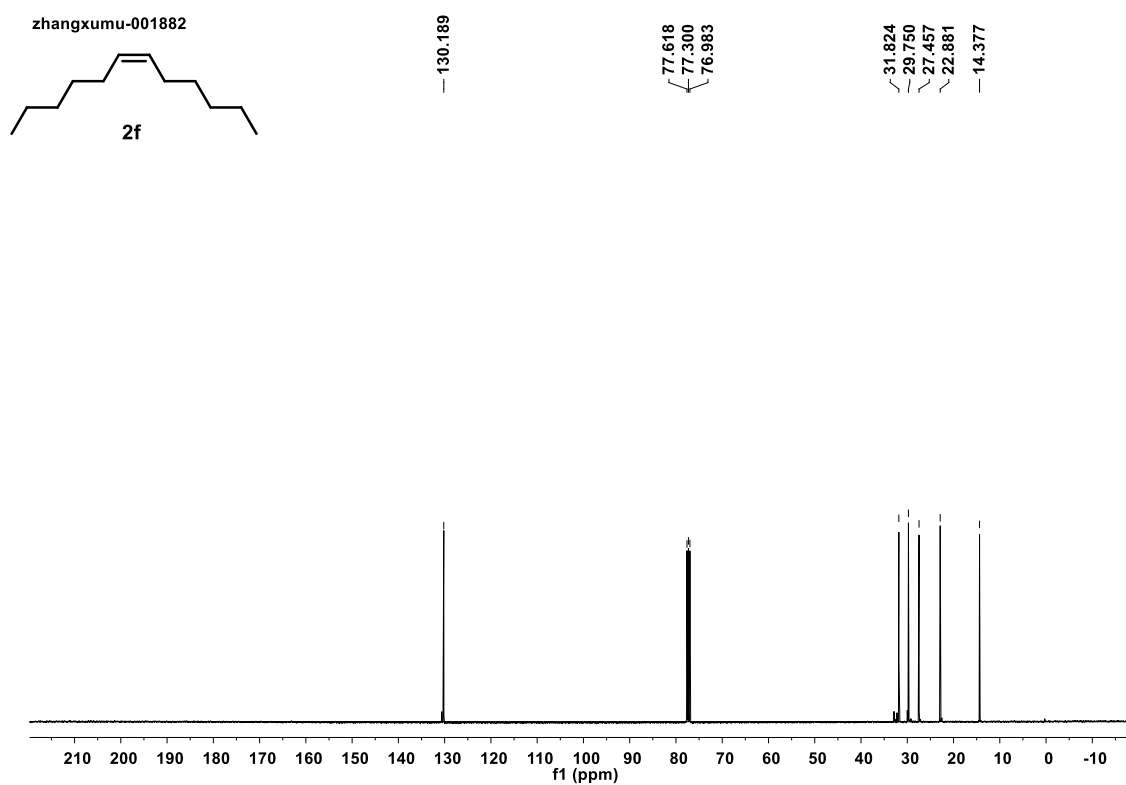

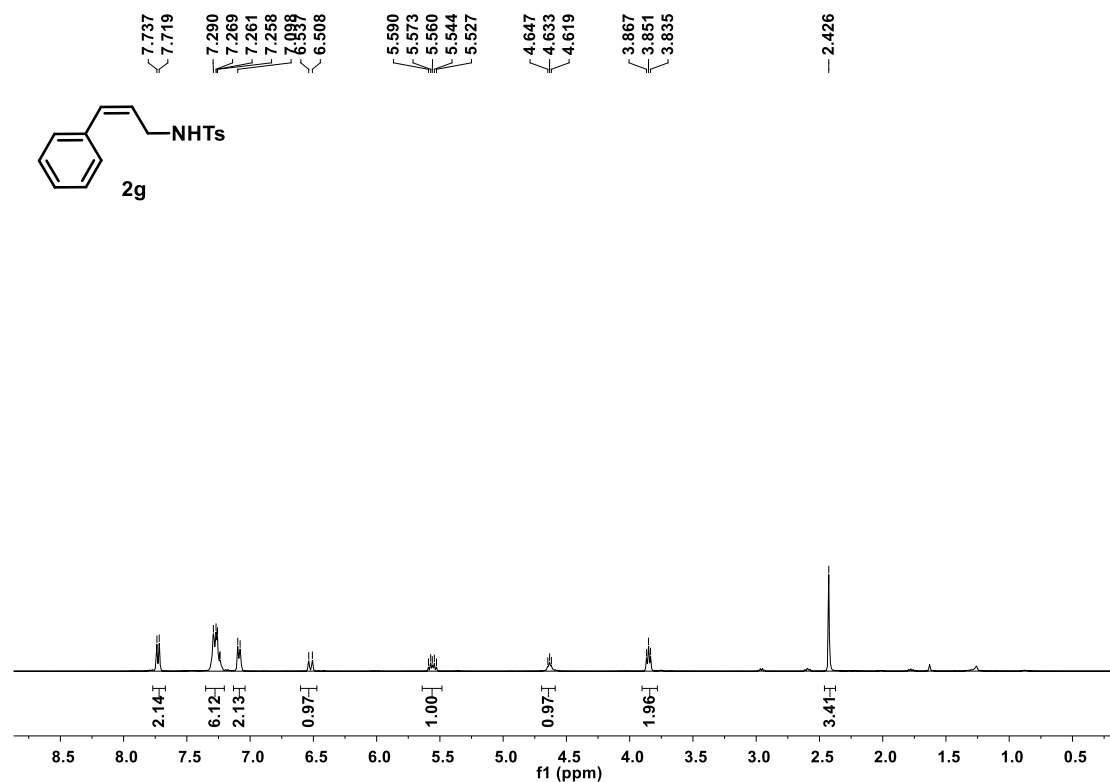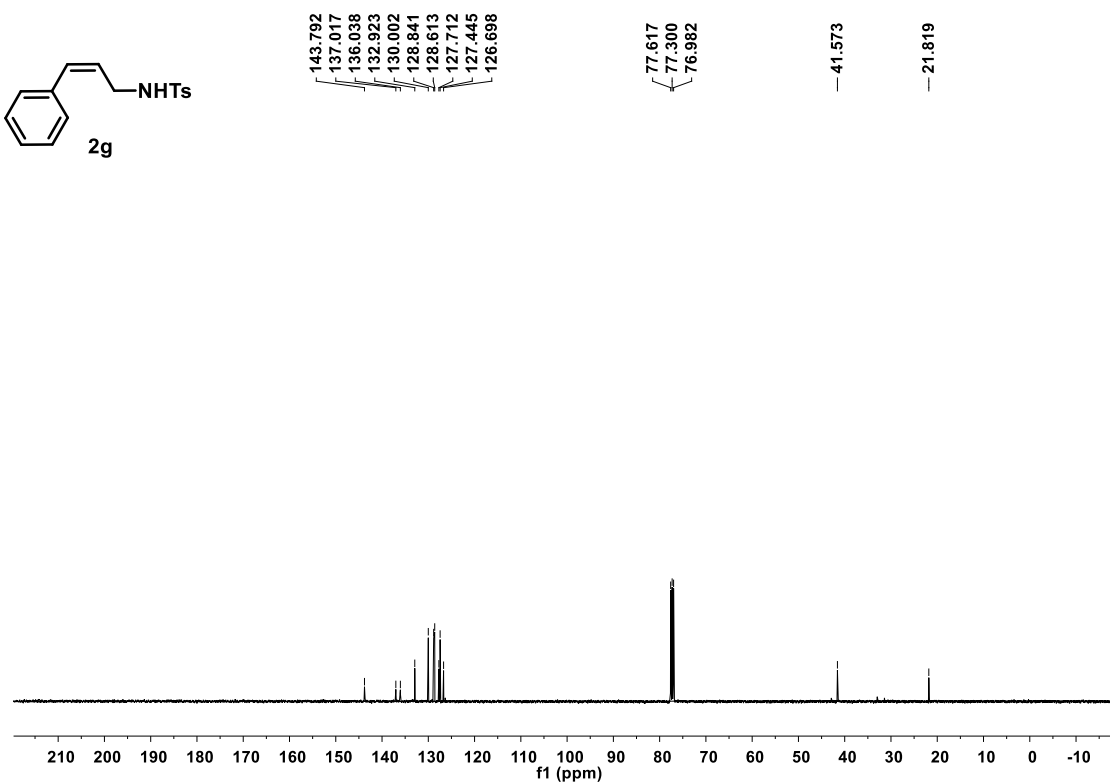



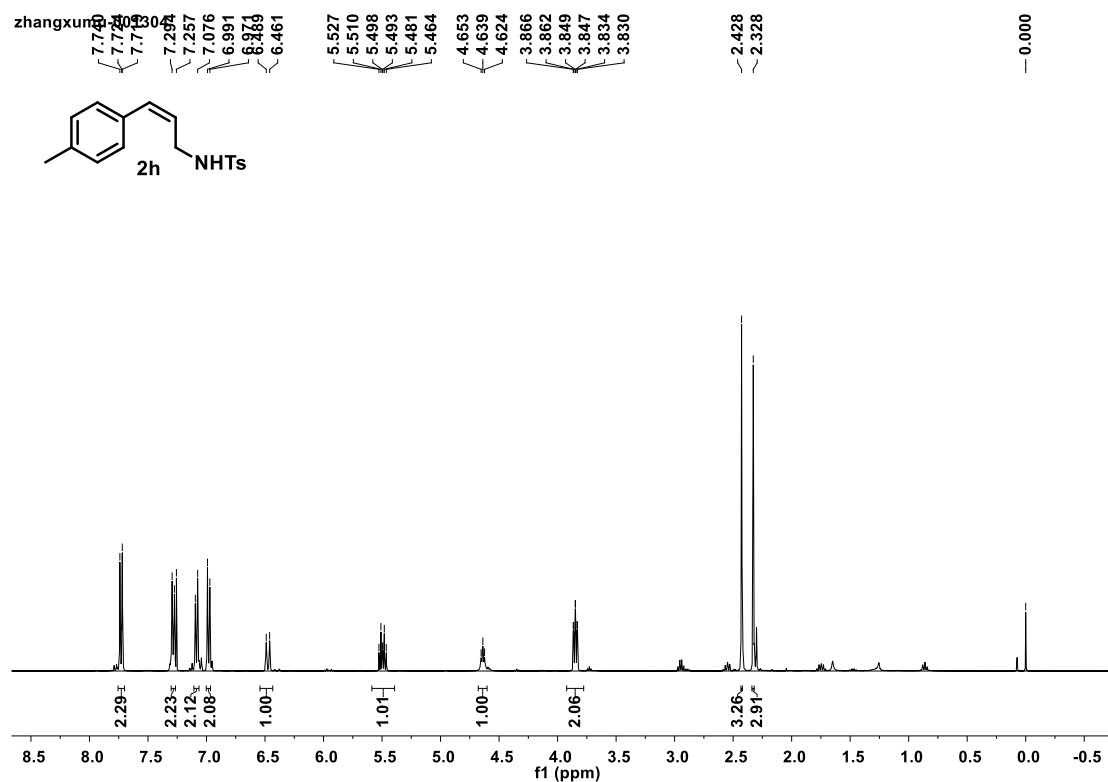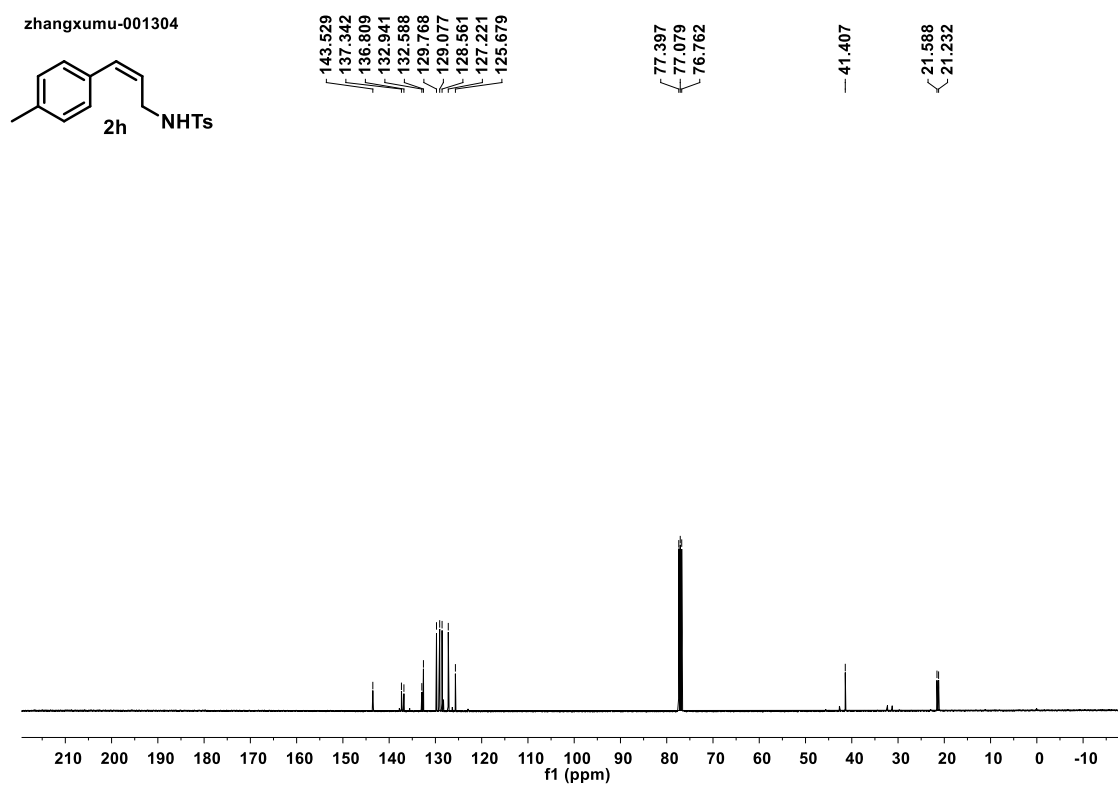

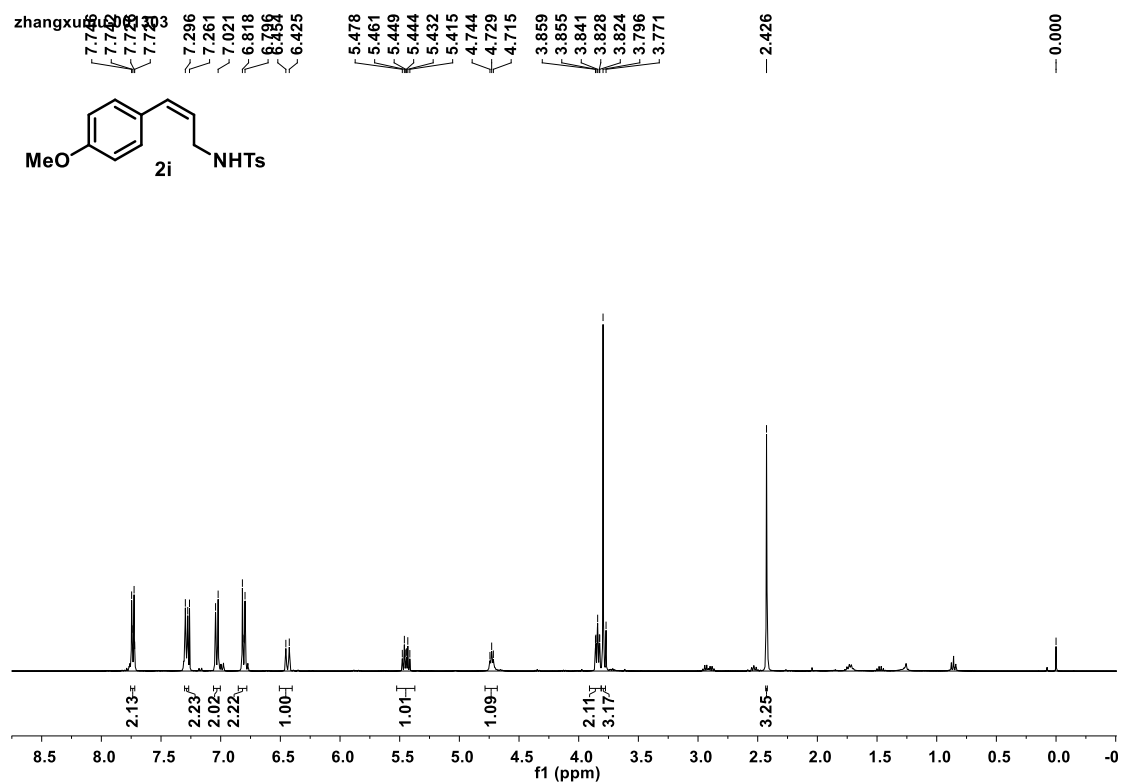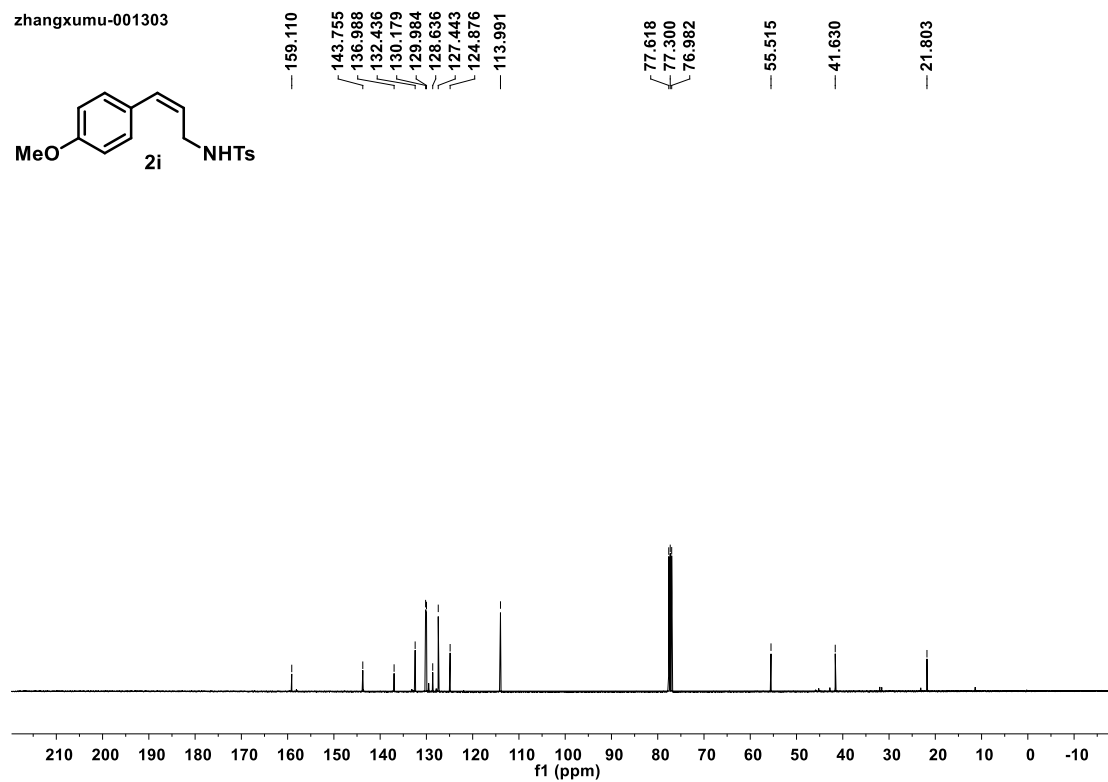

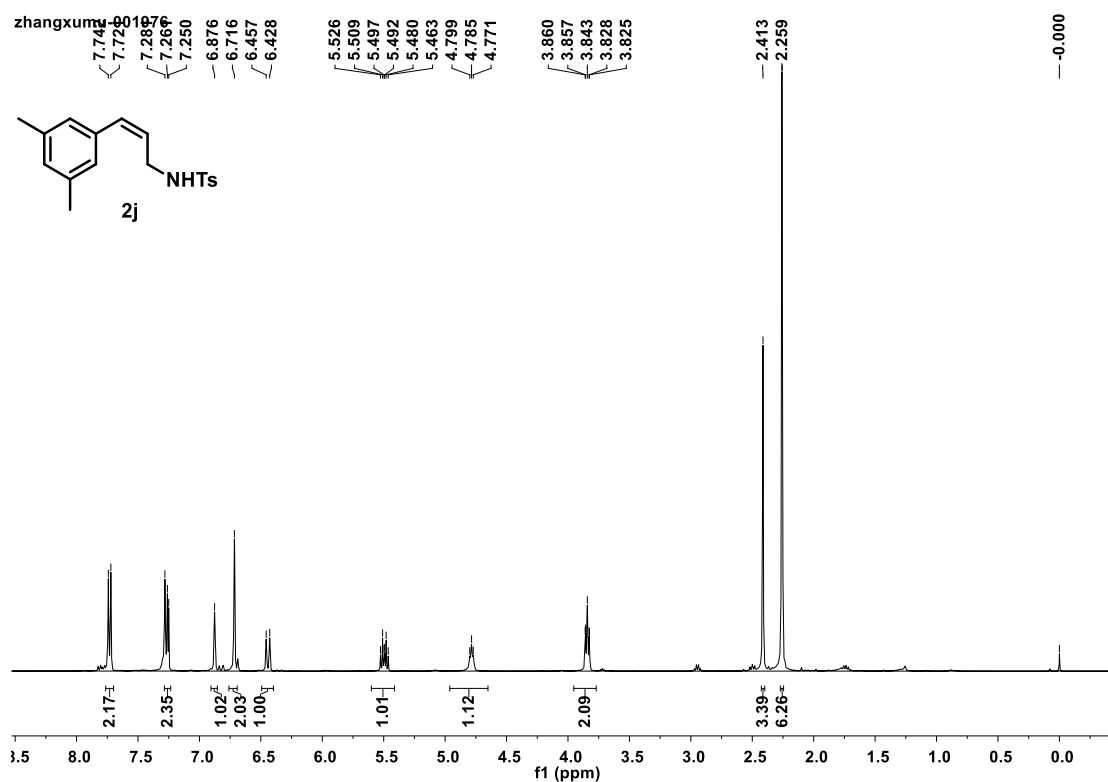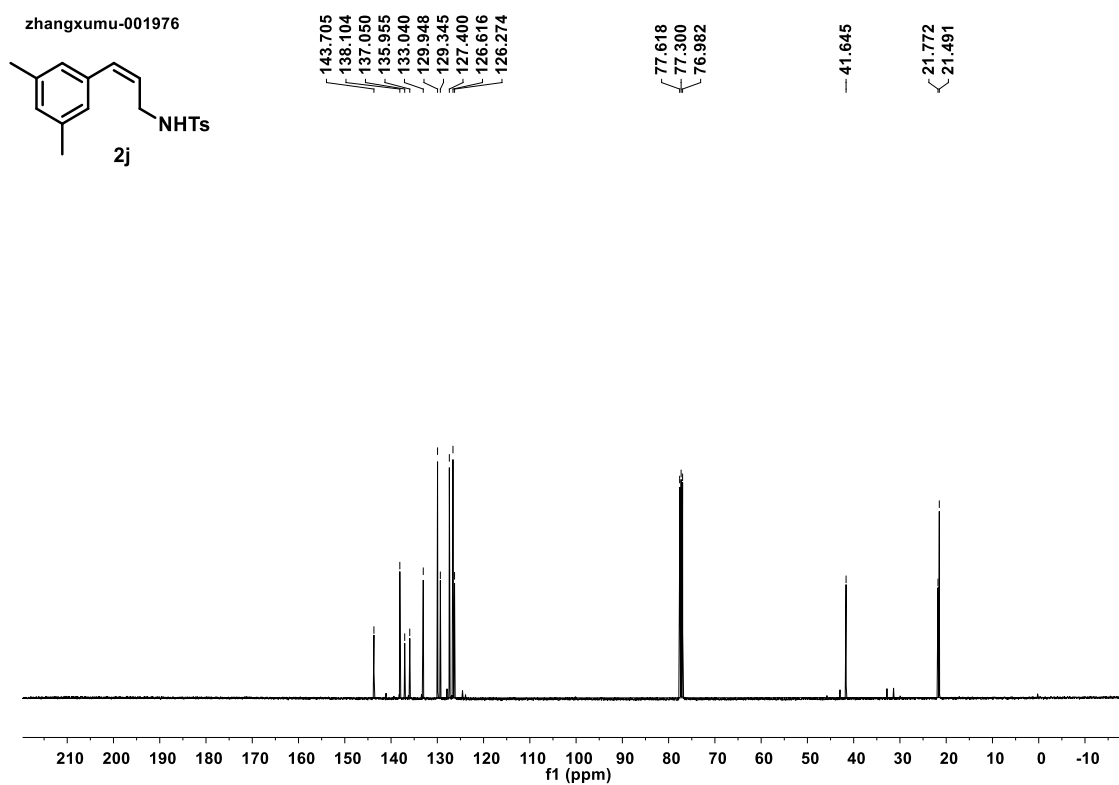

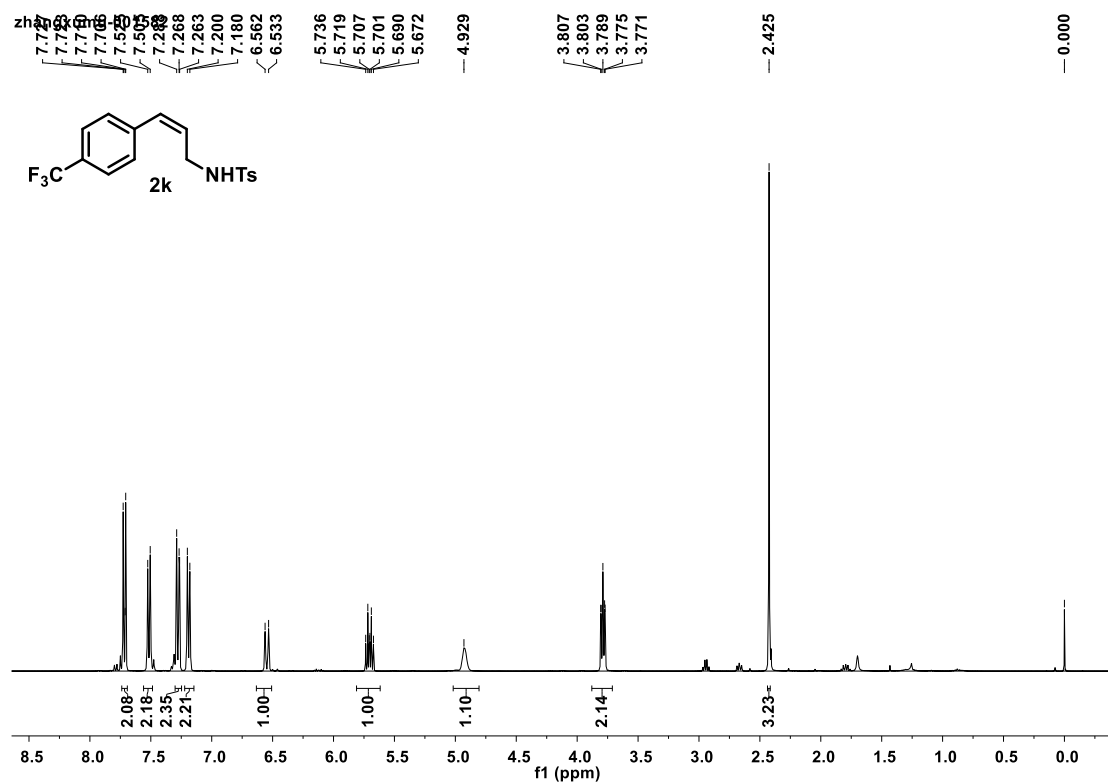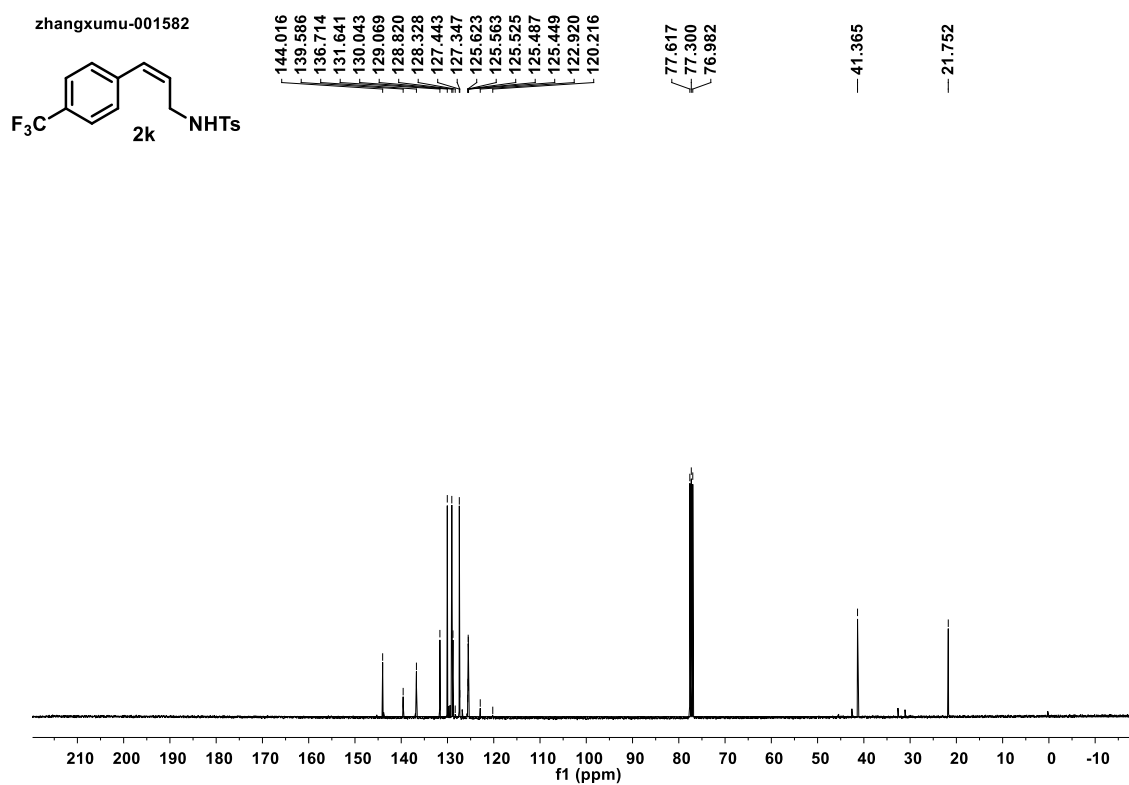

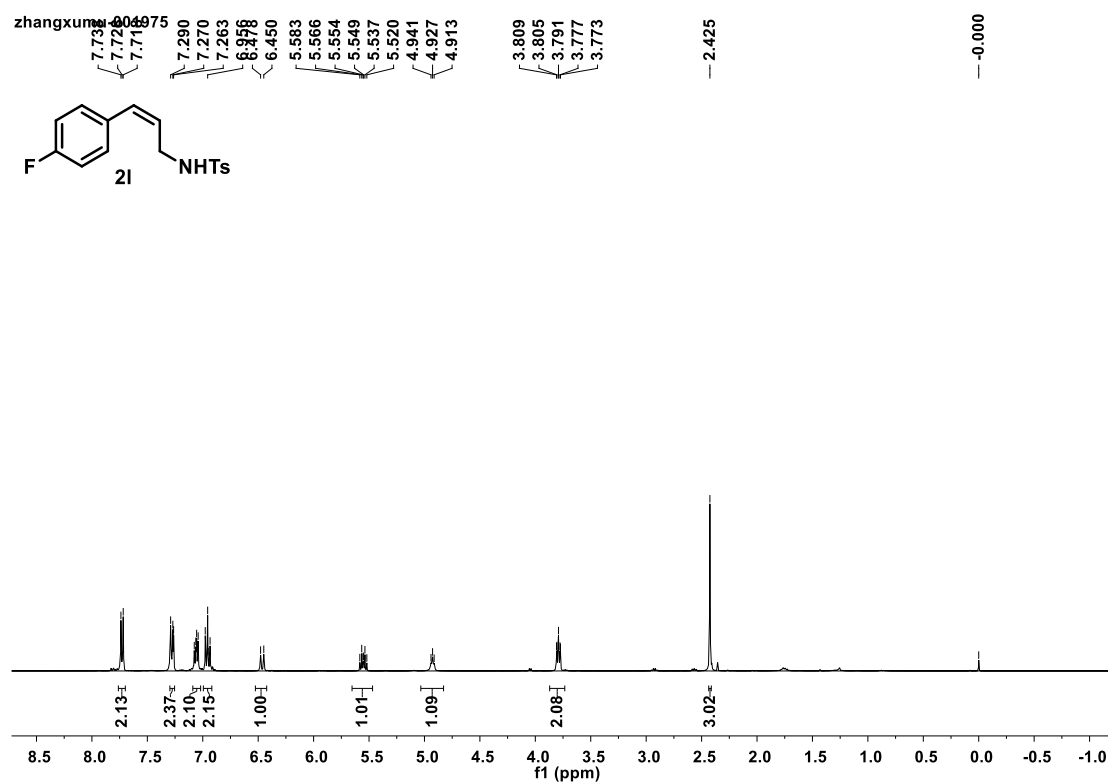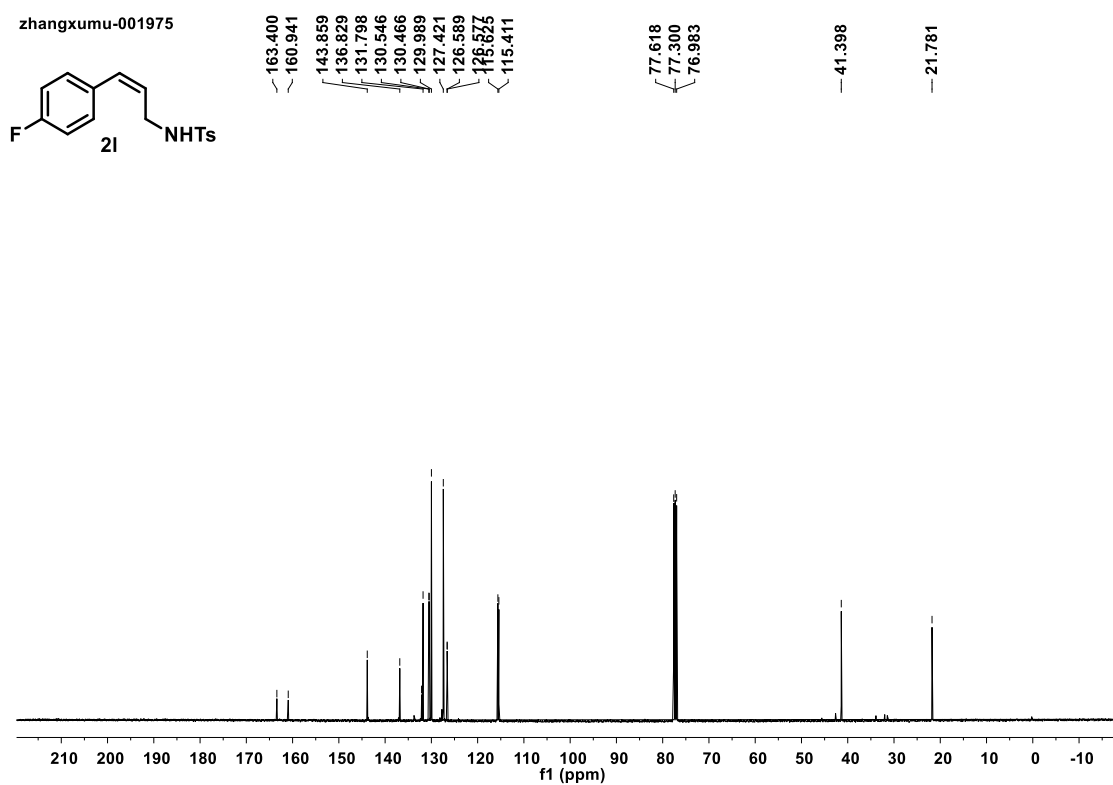

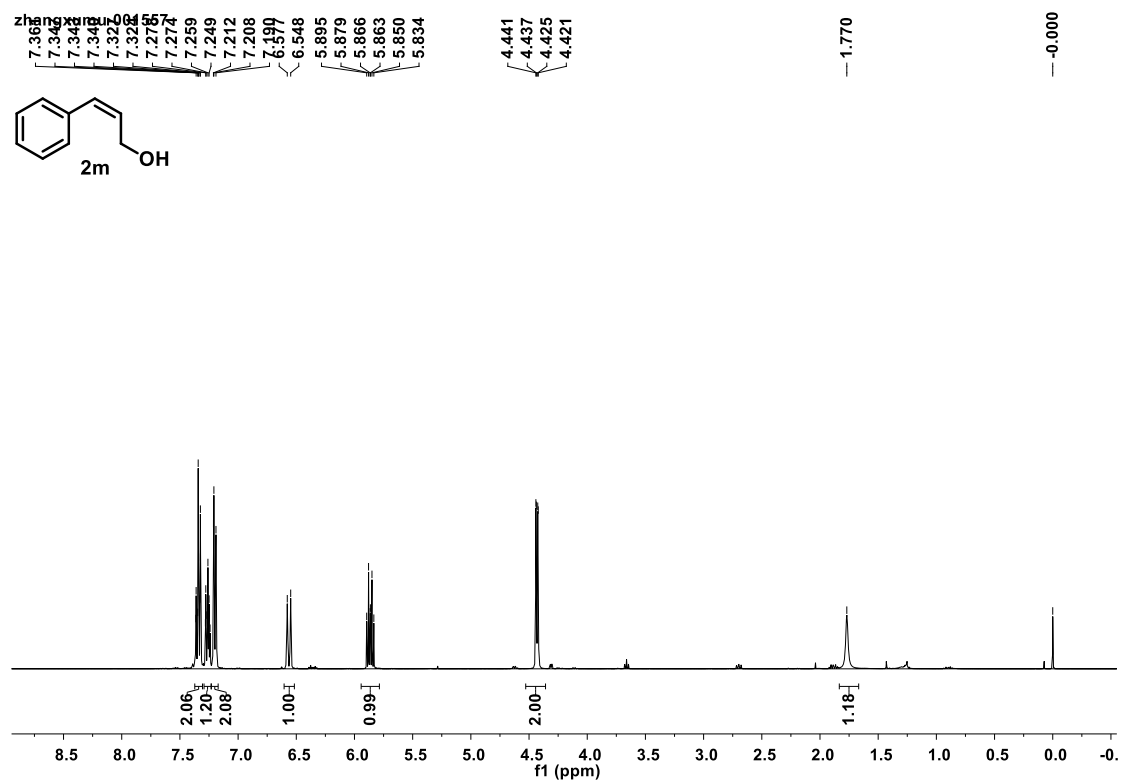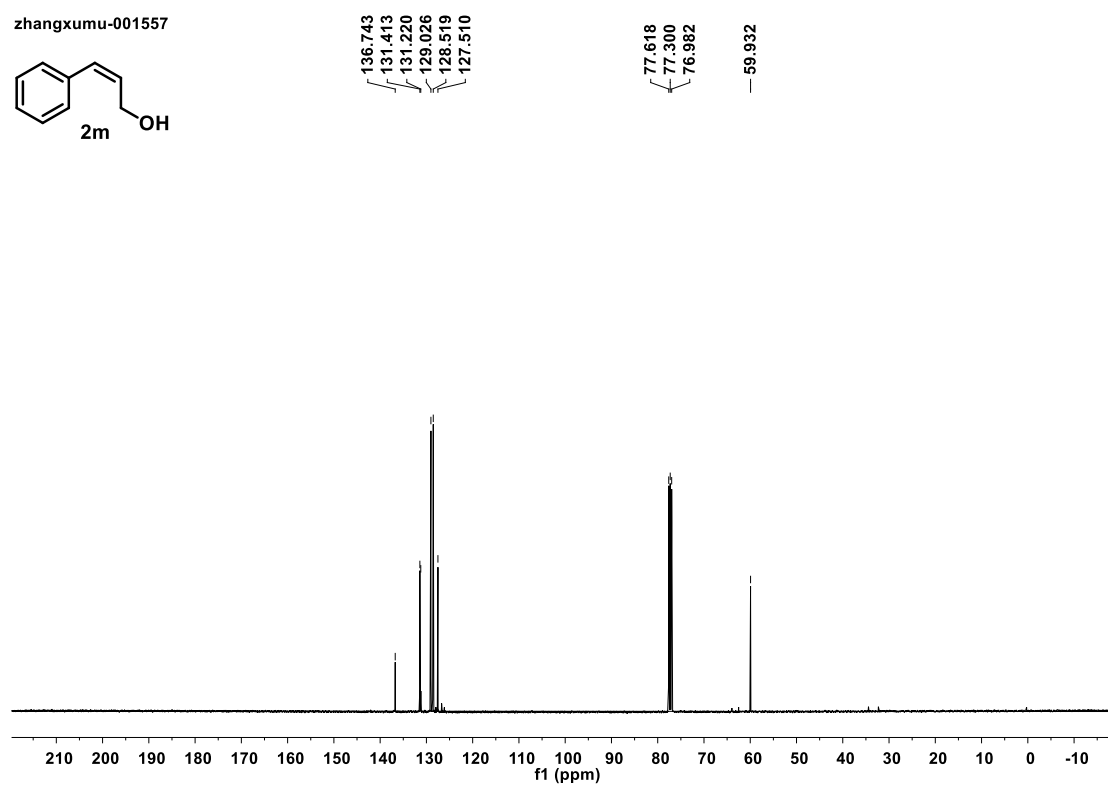

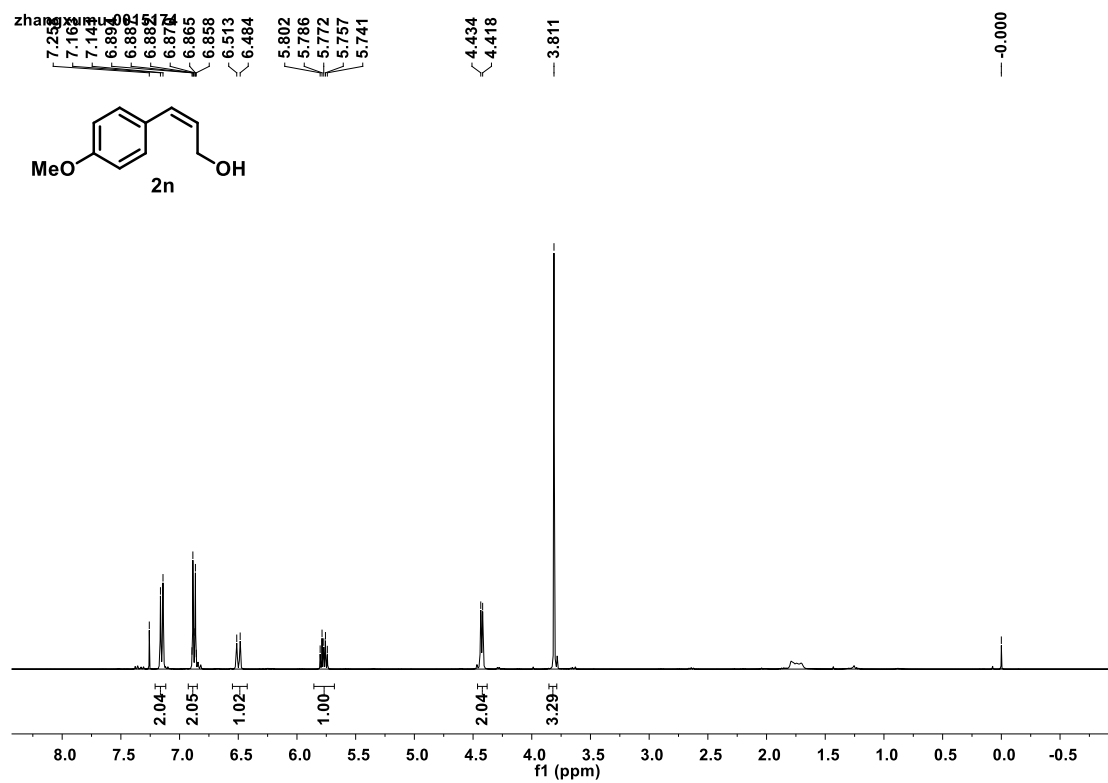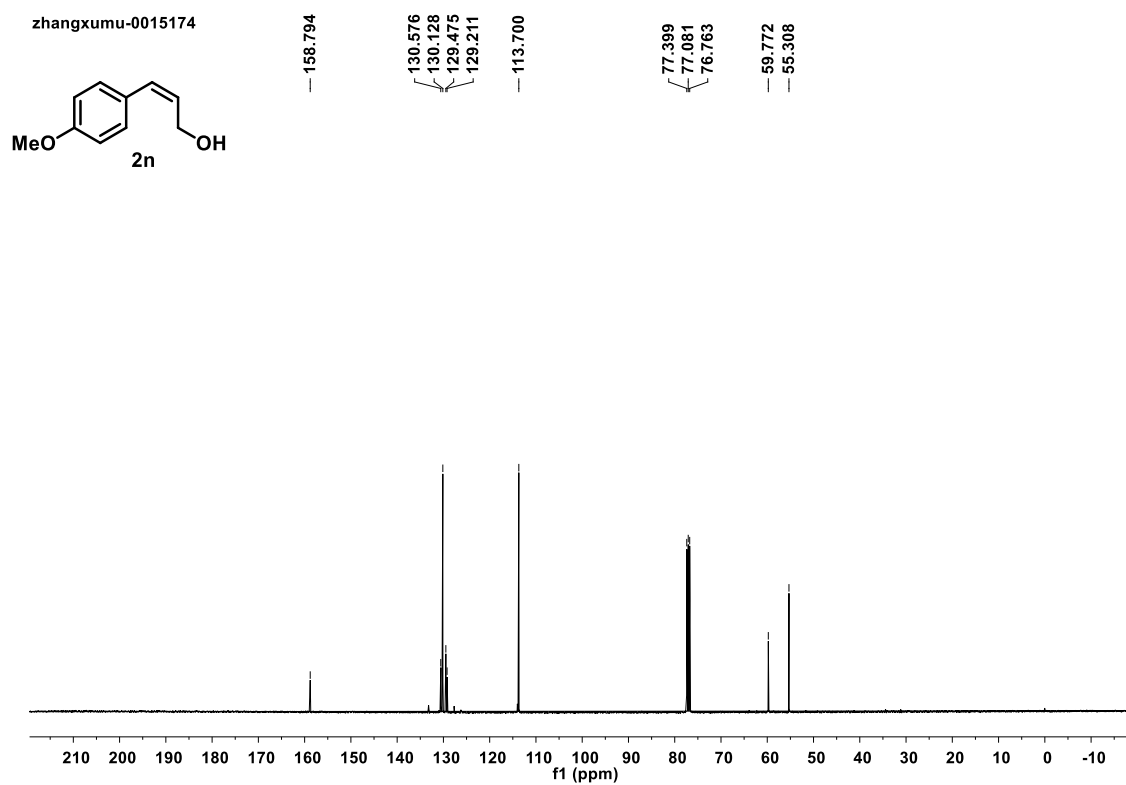

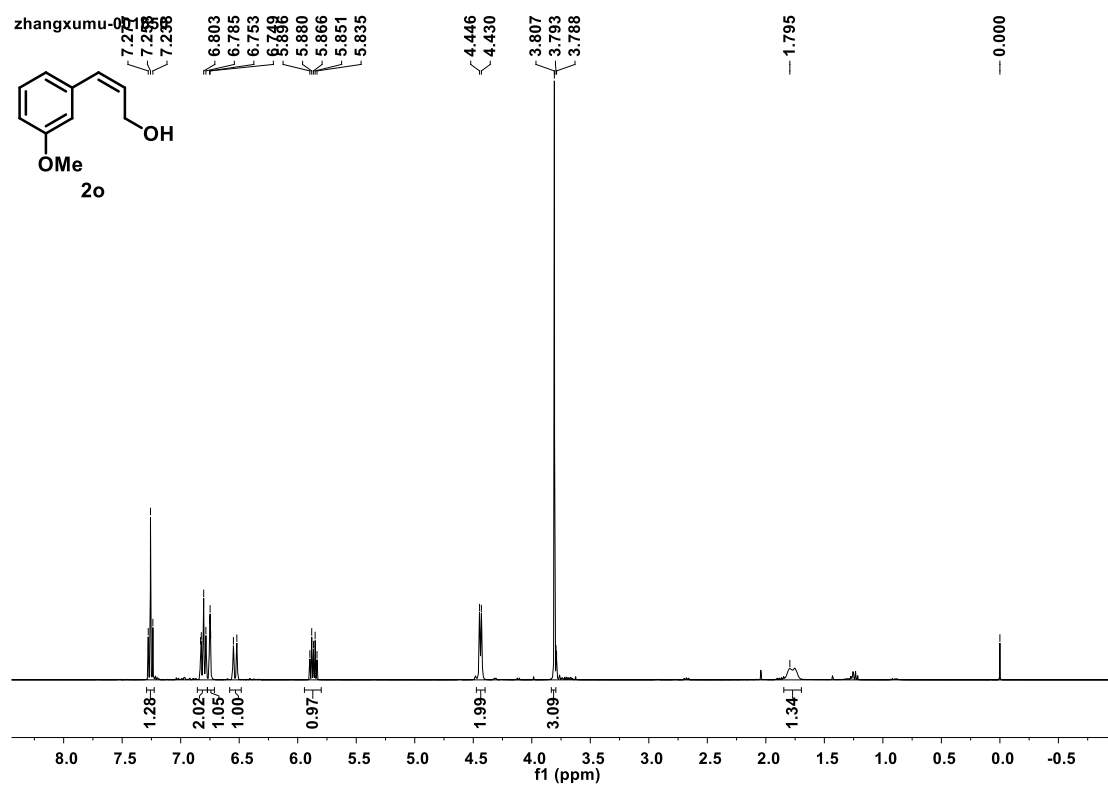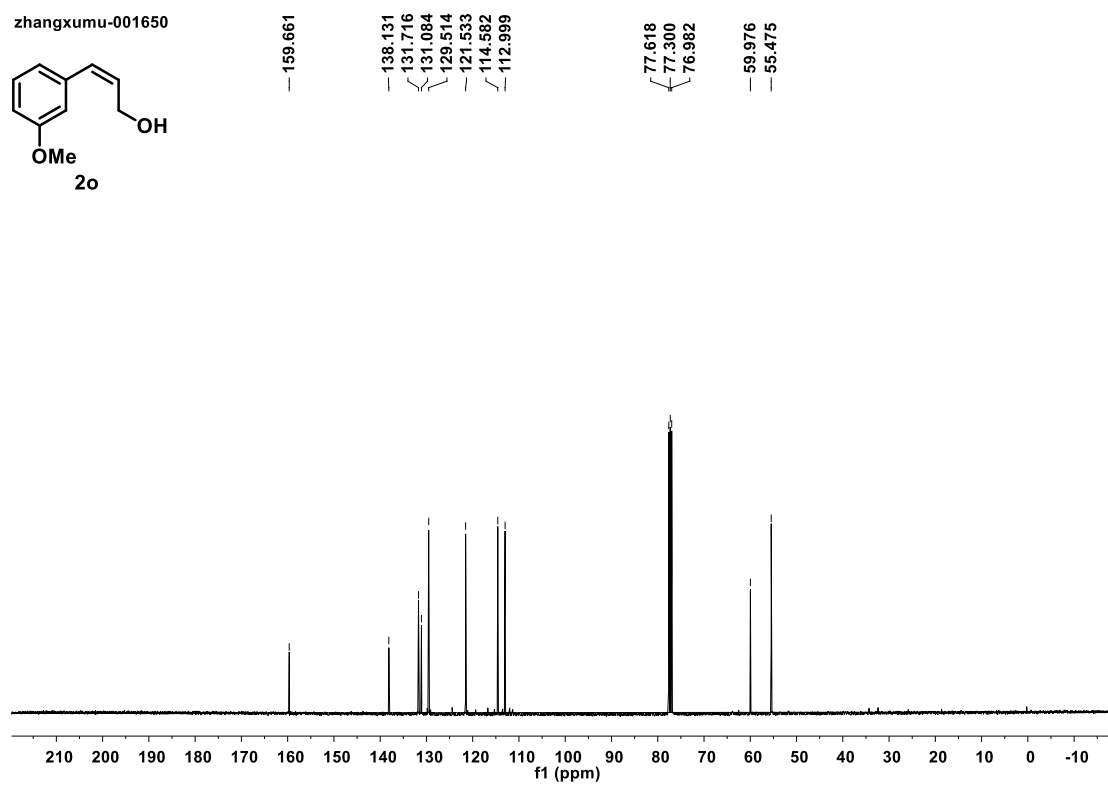



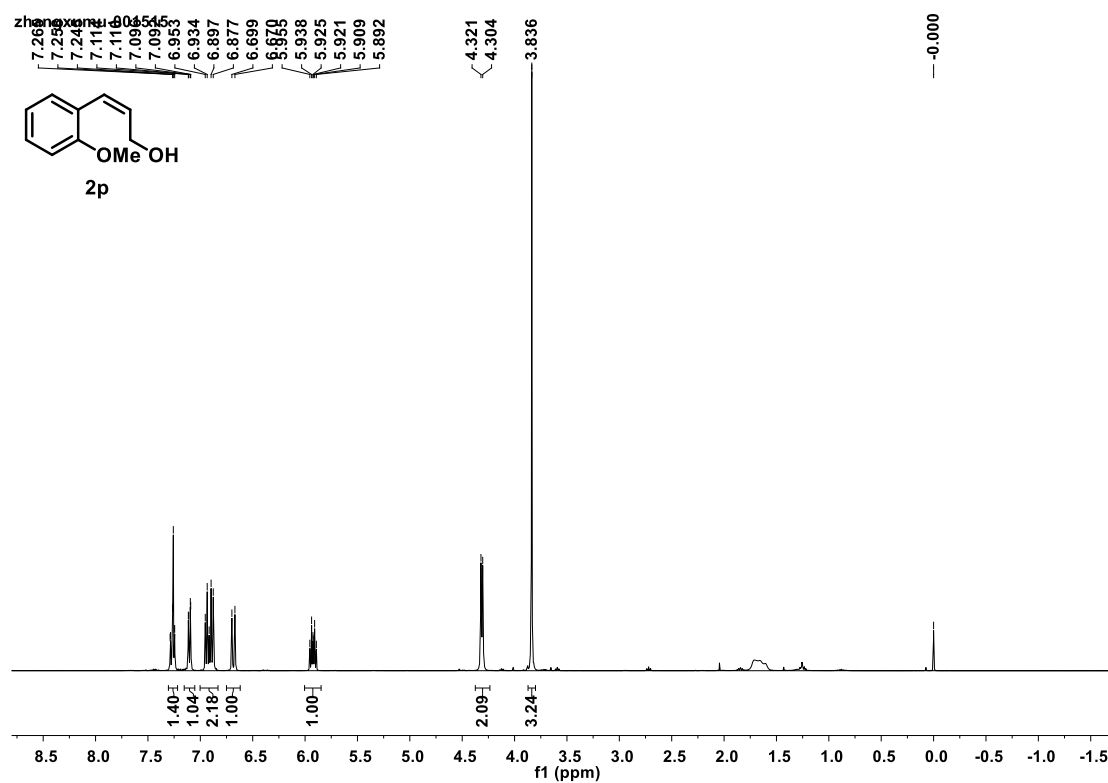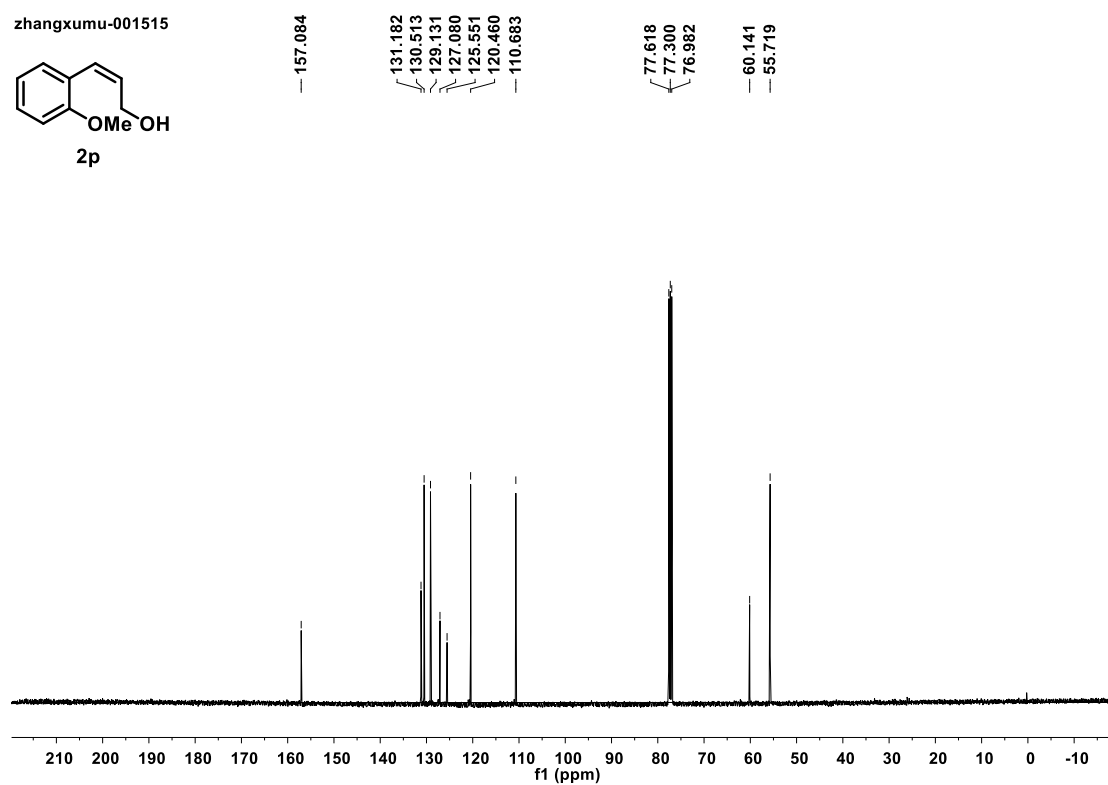

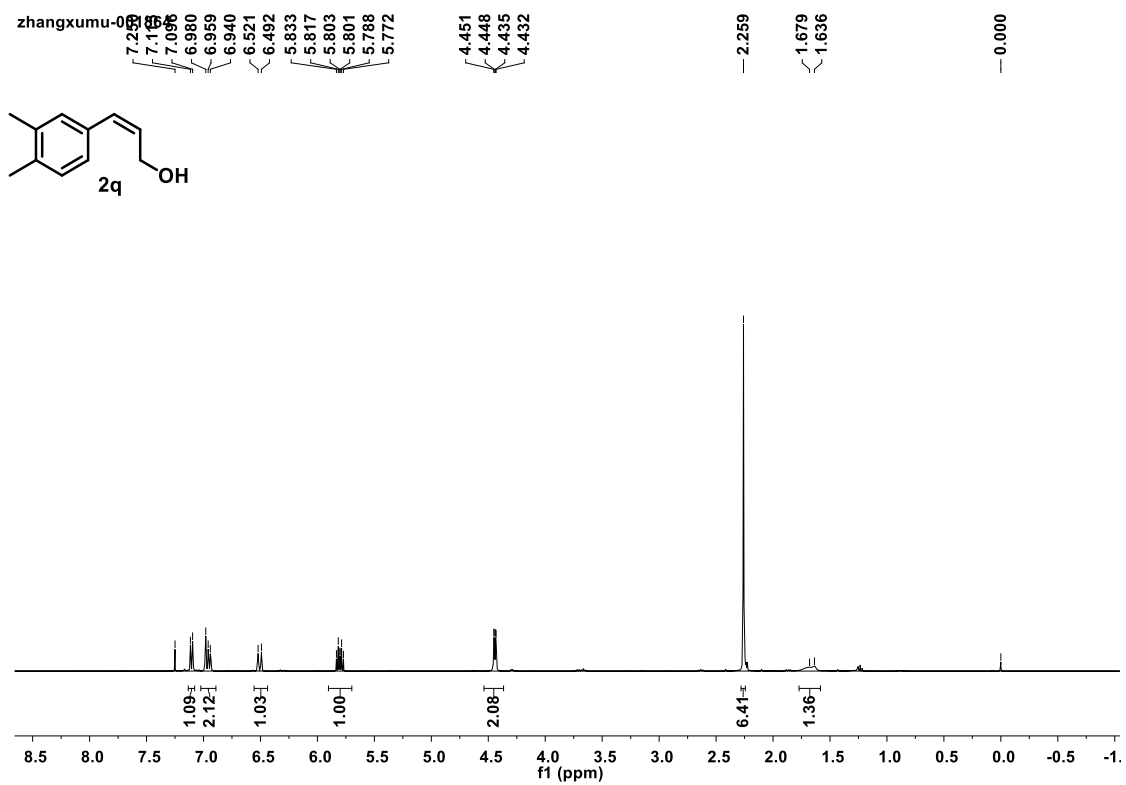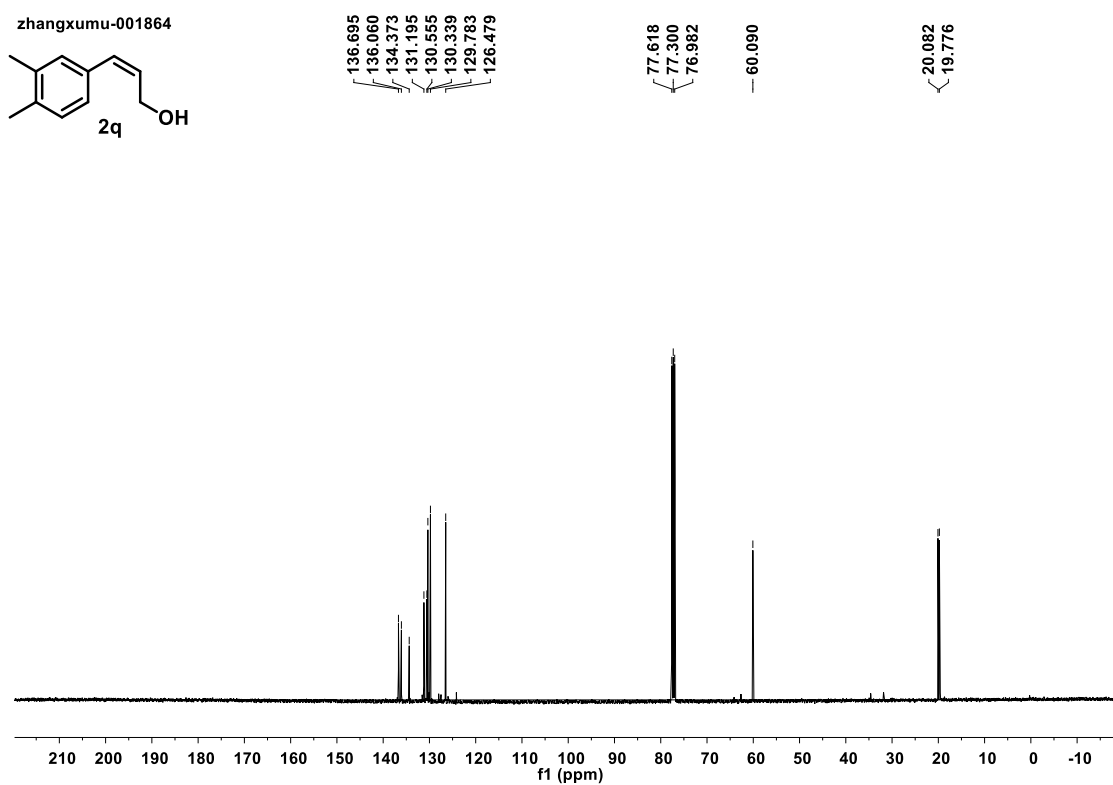

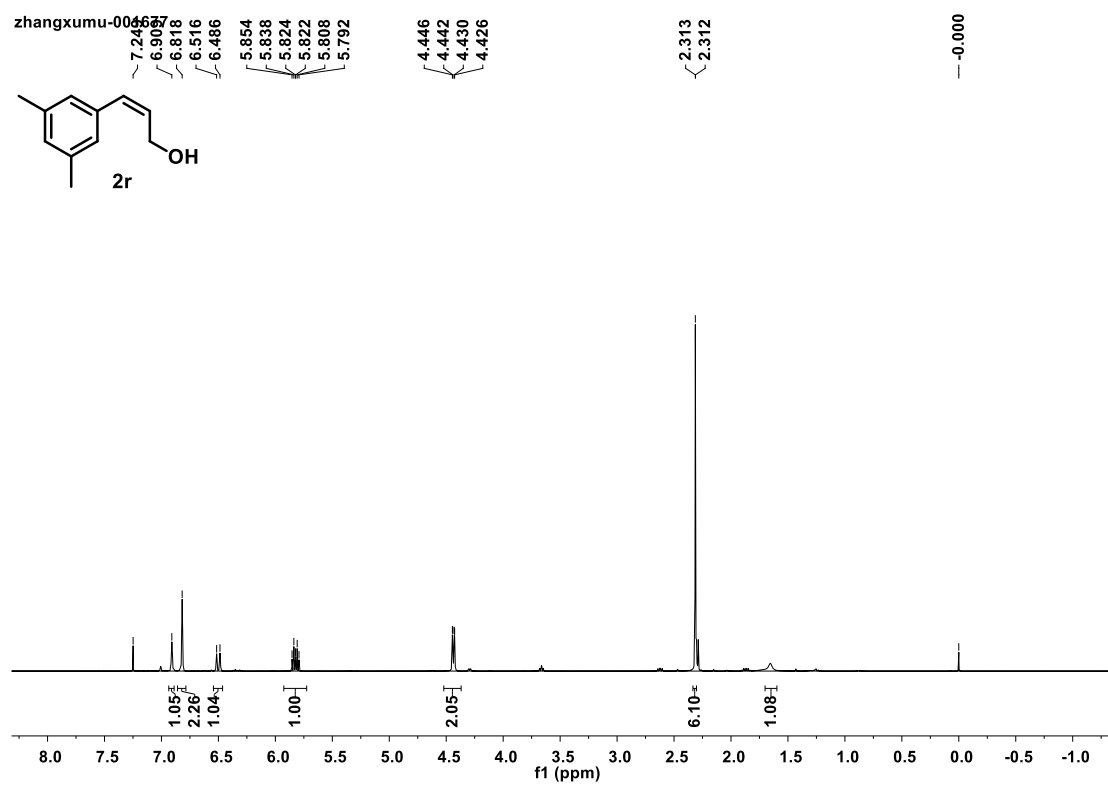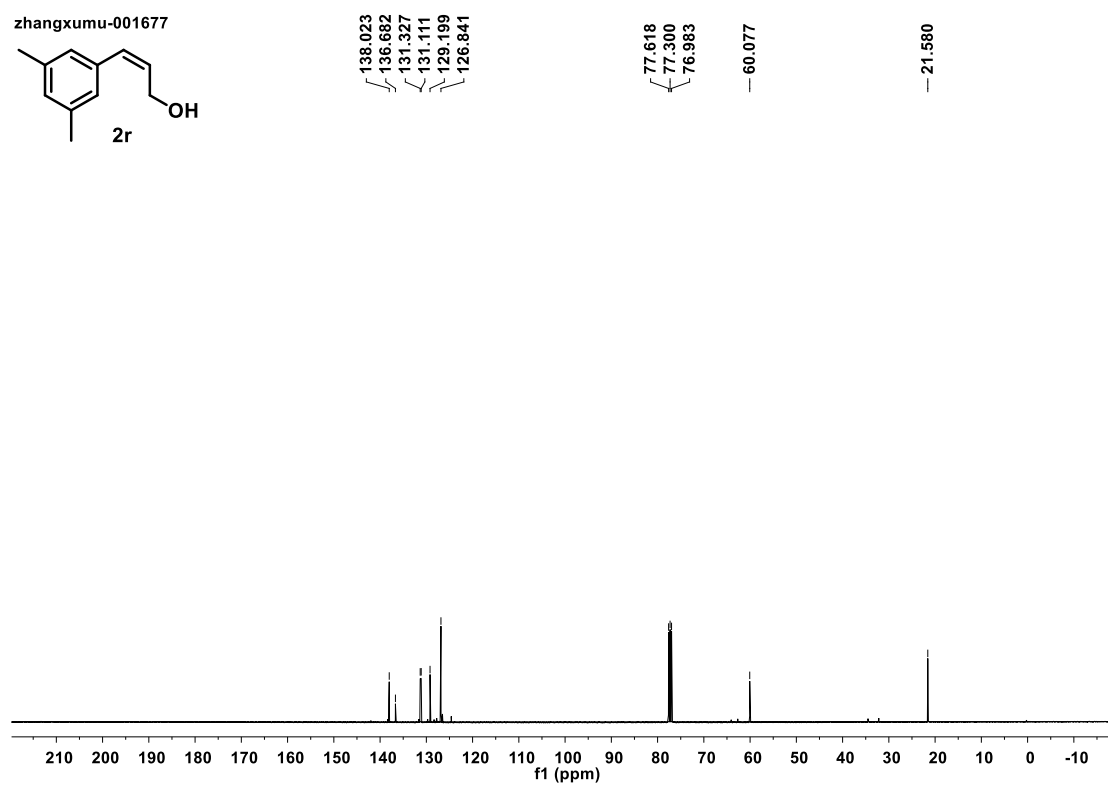

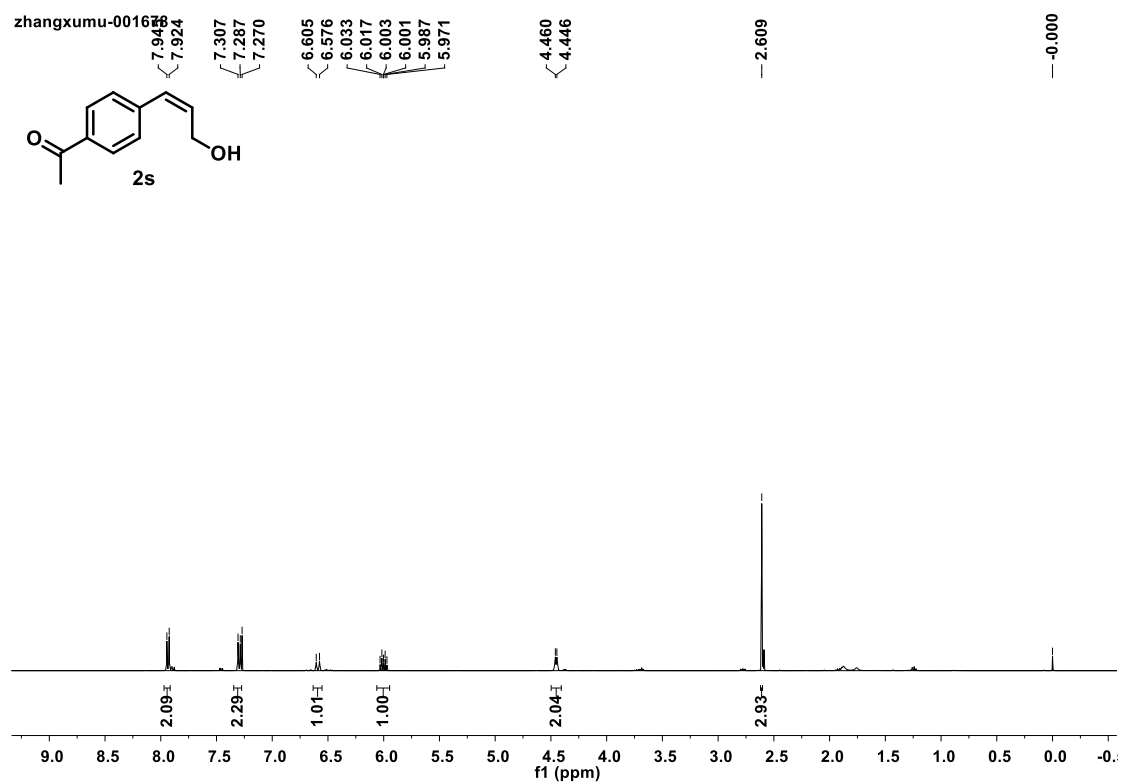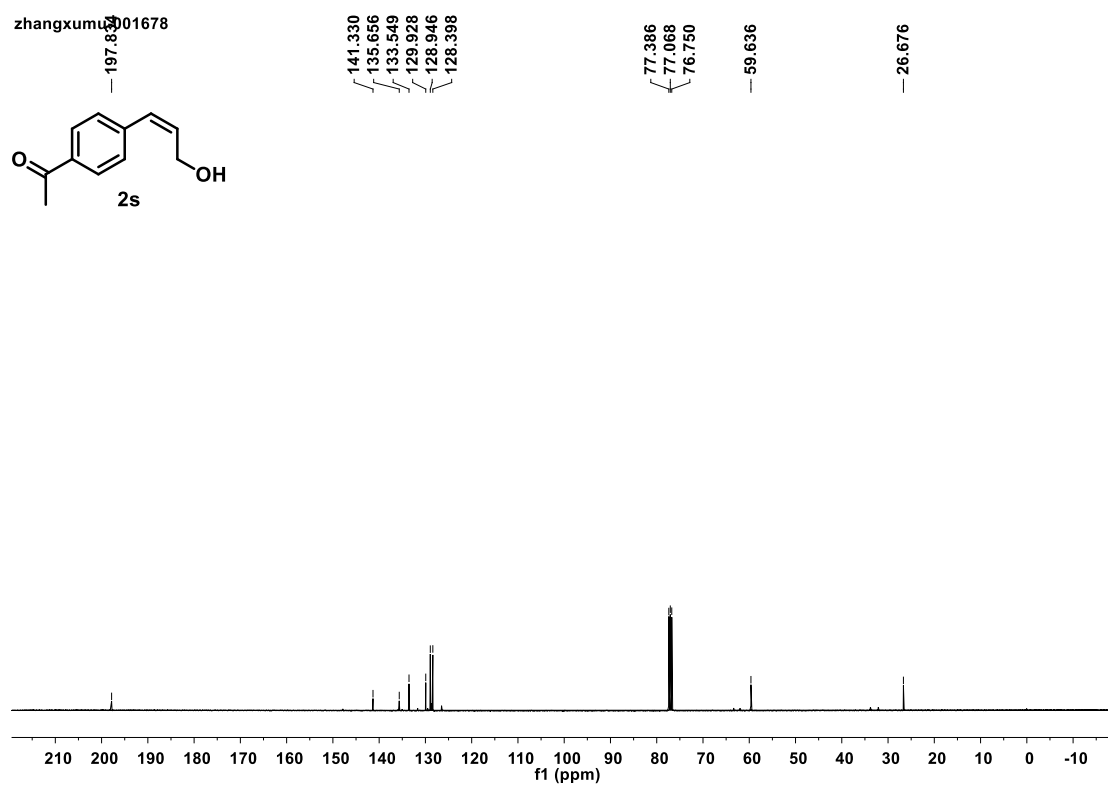

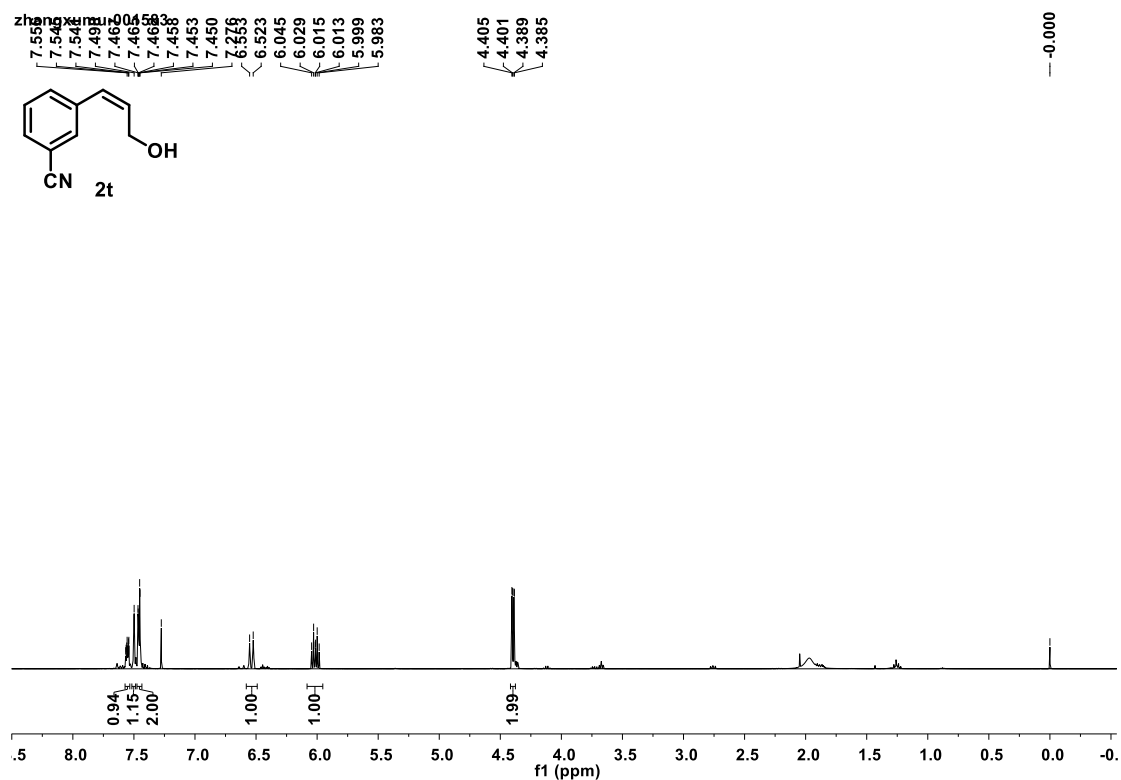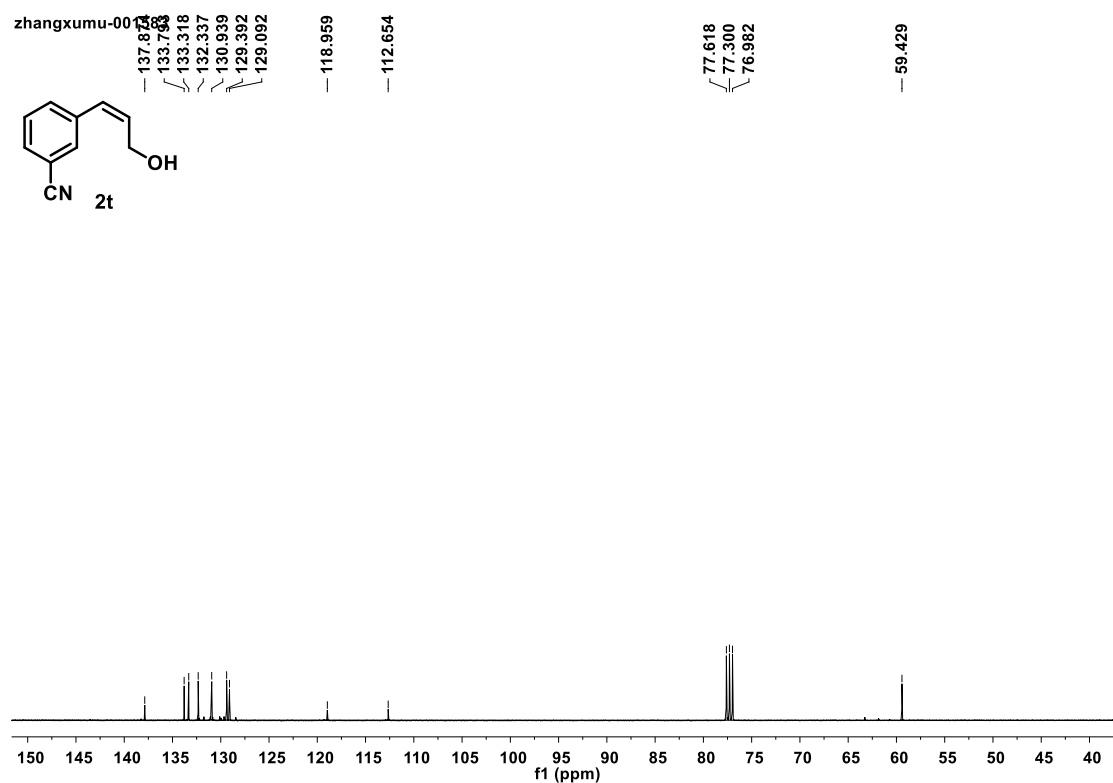

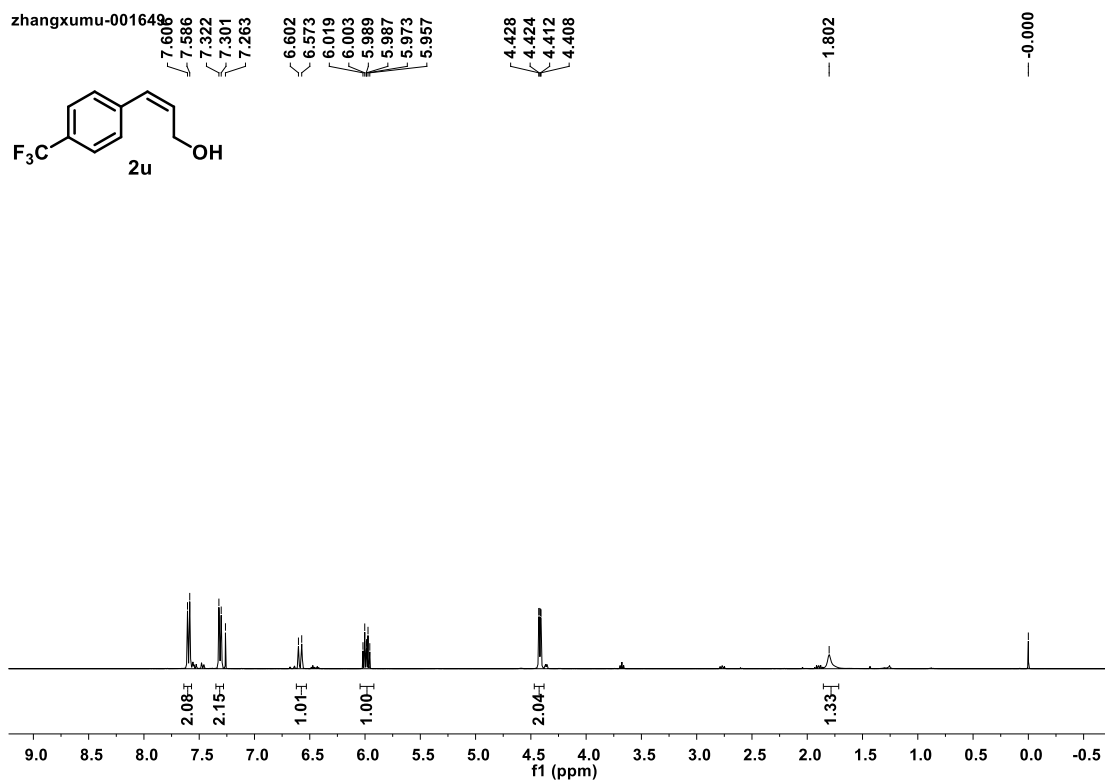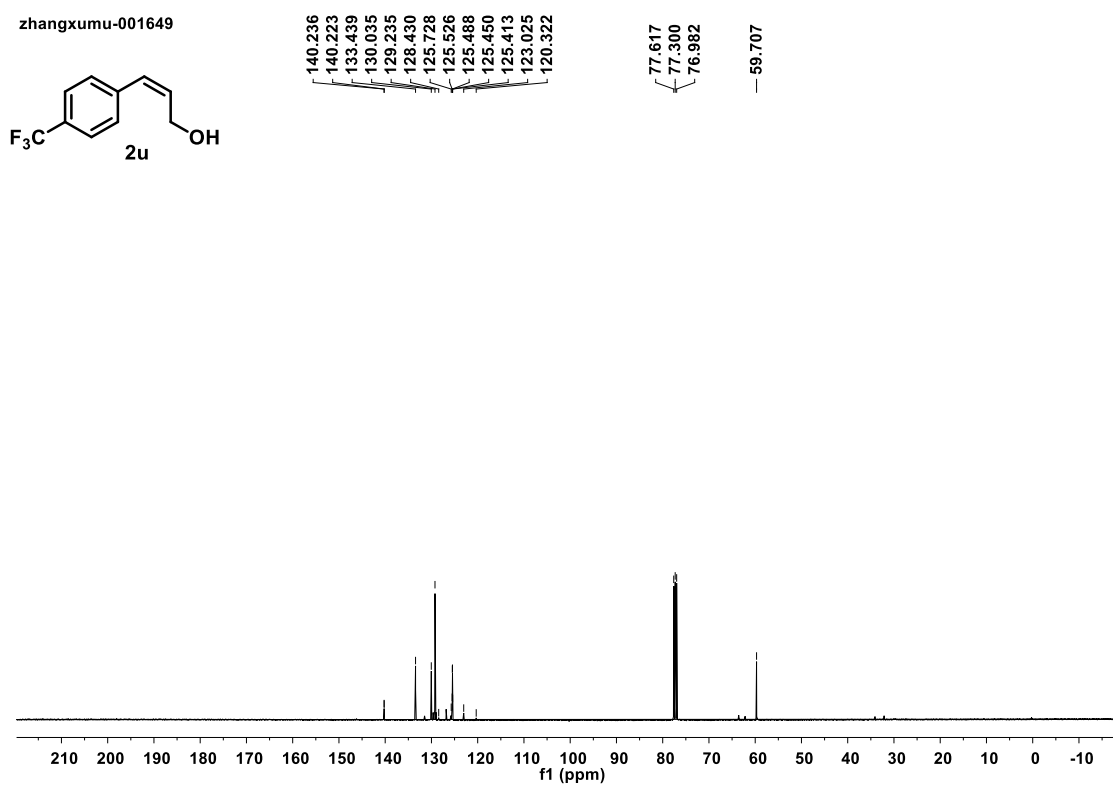

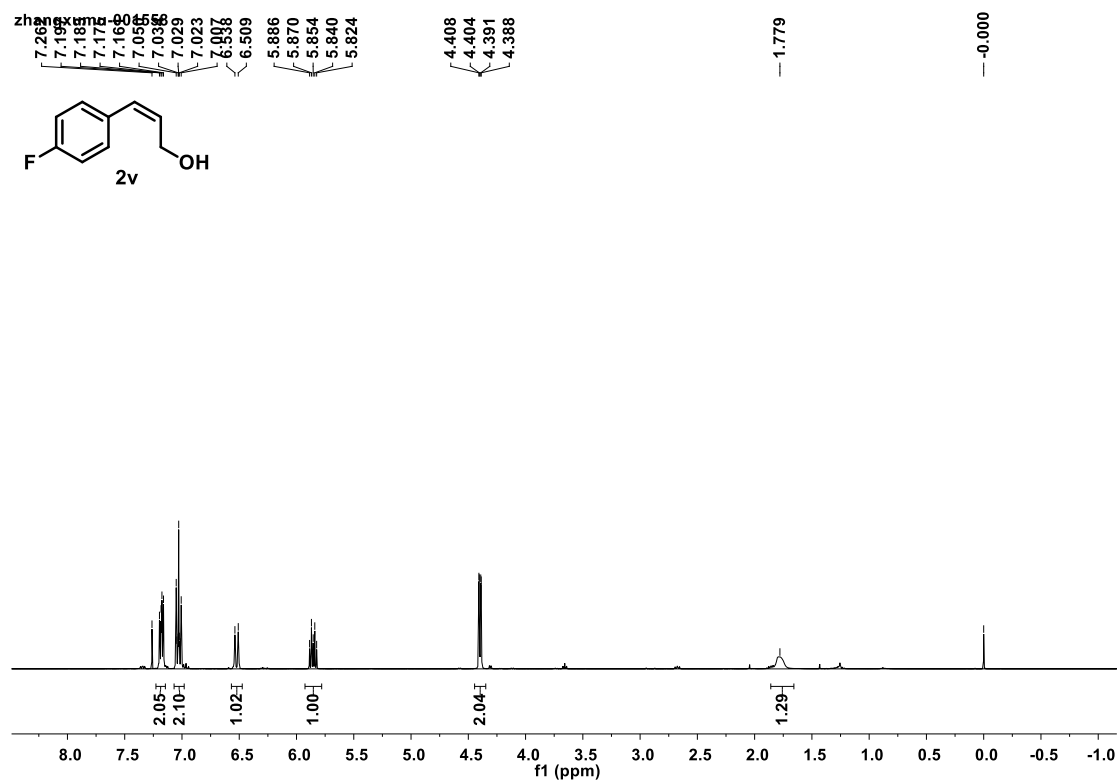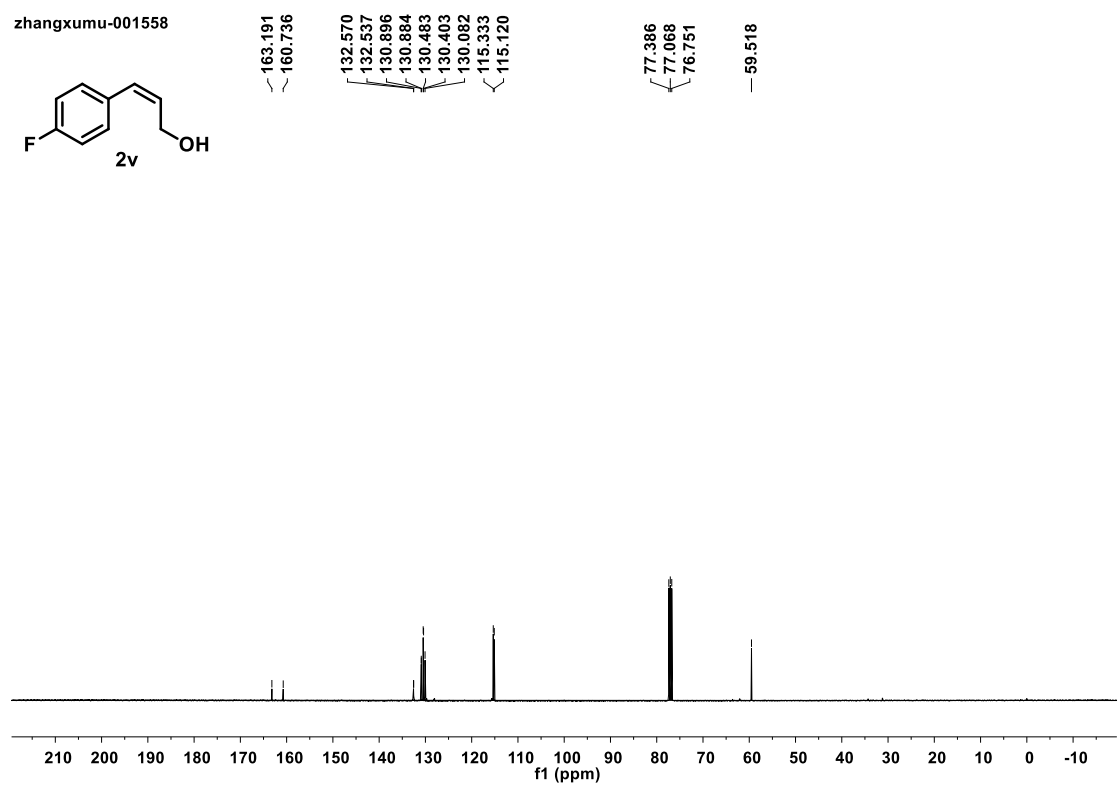

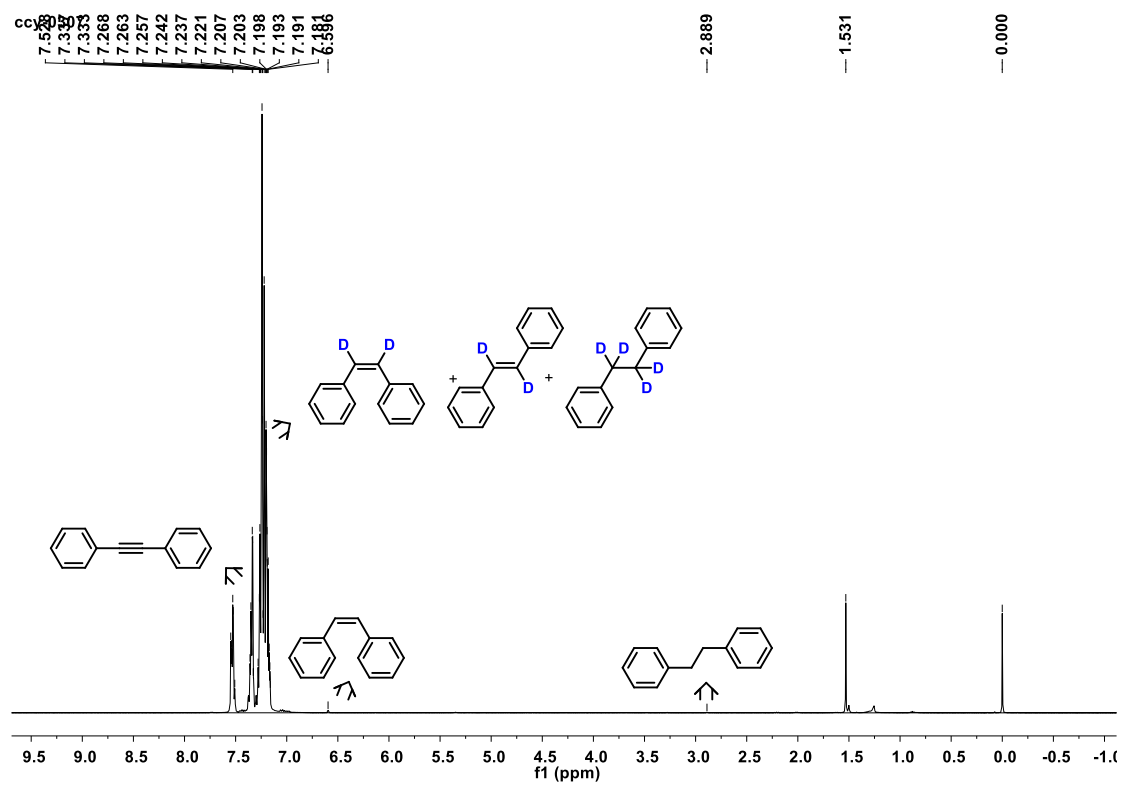



## References

1. Z. Zhang, Q. Wang, C. Chen, Z. Han, X.-Q. Dong, X. Zhang, *Org. Lett.*, **2016**, *18*, 3290–3293.
2. B. Prabagar, S. Nayak, R. Prasad, A. K. Sahoo, *Org. Lett.*, **2016**, *18*, 3066–3069.
3. Y.-F. Qiu, F. Yang, Z.-H. Qiu, M.-J. Zhong, L.-J. Wang, Y.-Y. Ye, B. Song, Y.-M. Liang, *J. Org. Chem.*, **2013**, *78*, 12018–12028.
